# 1 Furin cleaves SARS-CoV-2 spike-glycoprotein 2 at S1/S2 and S2' for viral fusion/entry: indirect 3 role of TMPRSS2

4 Rachid Essalmani<sup>1</sup>, Jaspreet Jain<sup>2</sup>, Delia Susan-Resiga<sup>1,7</sup>, Ursula Andréo<sup>1,2,7</sup>, Alexandra  
5 Evagelidis<sup>1,7</sup>, Rabeb Mouna Derbali<sup>1,7</sup>, David N. Huynh<sup>1</sup>, Frédéric Dallaire<sup>2</sup>, Mélanie Laporte<sup>2</sup>,  
6 Adrien Delpal<sup>3</sup>, Priscila Sutto-Ortiz<sup>3</sup>, Bruno Coutard<sup>4</sup>, Claudine Mapa<sup>5</sup>, Keith Wilcoxon<sup>5</sup>,  
7 Étienne Decroly<sup>3</sup>, Tram NQ Pham<sup>2</sup>, Éric A. Cohen<sup>2,6\*</sup> & Nabil G. Seidah<sup>1\*</sup>  
8

9 <sup>1</sup> **Laboratory of Biochemical Neuroendocrinology Montreal Clinical Research Institute**  
10 (IRCM, affiliated to the University of Montreal) 110 Pine Ave west, Montreal, QC, H2W1R7,  
11 Canada: Rachid Essalmani, Delia Susan-Resiga, Ursula Andréo, Alexandra Evagelidis, Rabeb  
12 Mouna Derbali, David Huynh, Nabil G. Seidah

13 <sup>2</sup> **Laboratory of Human Retrovirology Montreal Clinical Research Institute** (IRCM,  
14 affiliated to the University of Montreal) 110 Pine Ave west, Montreal, QC, H2W1R7, Canada:  
15 Jaspreet Jain, Ursula Andréo, Frédéric Dallaire, Mélanie Laporte, Tram Pham, Éric A. Cohen

16 <sup>3</sup> **AFMB, CNRS**, Université Aix-Marseille, UMR 7257, Case 925, 163 Avenue de Luminy,  
17 13288 Marseille Cedex 09, France, Marseille, France : Adrien Delpal, Priscila Sutto-Ortiz,  
18 Étienne Decroly

19 <sup>4</sup> **Unité des Virus Émergents** (UVE: Aix-Marseille Univ - IRD 190 - **Inserm** 1207 - IHU  
20 Méditerranée Infection), Marseille, France : Bruno Coutard

21 <sup>5</sup> **Boston Pharmaceuticals**, Translational Research, 55 Cambridge Parkway, Suite 400,  
22 Cambridge, MA 02142, USA: Claudine Mapa, Keith Wilcoxon

23 <sup>6</sup> These pairs of authors each contributed equally: Delia Susan-Resiga/Ursula Andreo; Alexandra  
24 Evagelidis/Rabeb Mouna Derbali.

25

26 \*Correspondence to: [seidahn@ircm.qc.ca](mailto:seidahn@ircm.qc.ca) and [eric.cohen@ircm.qc.ca](mailto:eric.cohen@ircm.qc.ca)

27

28

29

## 30 **Abstract**

31 

---

32 The Spike (S)-protein of SARS-CoV-2 binds host-cell receptor ACE2 and requires proteolytic  
33 “priming” (S1/S2) and “fusion-activation” (S2’) for viral entry. The S-protein furin-like motifs  
34 **PRRAR**<sub>685</sub>↓ and **KPSKR**<sub>815</sub>↓ indicated that proprotein convertases promote virus entry. We  
35 demonstrate that furin and PC5A induce cleavage at both sites, ACE2 enhances S2’ processing, and  
36 their pharmacological inhibition (BOS-inhibitors) block endogenous cleavages. S1/S2-mutations  
37 (μS1/S2) limit S-protein-mediated cell-to-cell fusion, similarly to BOS-inhibitors. Unexpectedly,  
38 TMPRSS2 does not cleave at S1/S2 or S2’, but it can: (i) cleave/inactivate S-protein into  
39 S2a/S2b; (ii) shed ACE2; (iii) cleave S1-subunit into secreted S1’, activities inhibited by  
40 Camostat. In lung-derived Calu-3 cells, BOS-inhibitors and μS1/S2 severely curtail “pH-  
41 independent” viral entry, and BOS-inhibitors alone/with Camostat potently reduce infectious  
42 viral titer and cytopathic effects. Overall, our results show that: furin plays a critical role in  
43 generating fusion-competent S-protein, and indirectly, TMPRSS2 promotes viral entry,  
44 supporting furin and TMPRSS2 inhibitors as potential antivirals against SARS-CoV-2.

45  
46

## 47 **Introduction**

48 

---

49 Epidemics date from prehistoric times but are exacerbated by overcrowding and human impact on  
50 the ecosystem<sup>1</sup>. The RNA coronaviruses (CoV) are zoonotic pathogens that spread in the human  
51 population, causing respiratory, enteric, renal and neurological diseases<sup>2</sup>. Electron microscopy of  
52 CoV revealed that the lipid envelope of each virion is surrounded by a “crown”-like structure<sup>3</sup>,  
53 composed of multiple copies of a viral surface glycoprotein known as “spike” (S), which is essential  
54 for receptor binding and virus entry. Severe acute respiratory syndrome coronavirus (SARS-CoV-1)

55 and Middle East respiratory syndrome coronavirus (MERS-CoV) are two highly transmissible and  
56 pathogenic viruses that appeared in humans at the beginning of the 21<sup>st</sup> century<sup>2, 4</sup>. At the end of  
57 2019, a third CoV, namely SARS-CoV-2, emerged causing widespread pandemic respiratory and  
58 vascular illnesses<sup>5</sup>, coined COVID-19<sup>6</sup>.

59 The secretory type-I membrane-bound S of SARS-CoV-2 is synthesized as a precursor  
60 glycoprotein (proS) that undergoes cleavage by host cell proteases at specific sites. During infection,  
61 the trimetric proS (monomer, 1,272 residues) is processed at an S1/S2 cleavage site by host cell  
62 proteases (Fig. 1A). This “priming” step divides the protein into two subunits S1 and S2 held  
63 together by non-covalent interactions. The N-terminal S1-ectodomain recognizes angiotensin  
64 converting enzyme-2 (ACE2) as its major entry receptor<sup>7</sup> *via* its receptor-binding-domain (RBD)<sup>8</sup>  
65 and the C-terminal membrane-anchored S2-subunit is involved in host-cell fusion and viral entry<sup>7</sup>.  
66 The S2-subunit contains a “fusion-activation” proteolytic site (S2’), followed by an  $\alpha$ -helical fusion  
67 peptide (FP) and two heptad-repeat domains preceding the transmembrane domain (TM) and  
68 cytosolic tail (CT) (Fig. 1A). Cleavage of proS at S1/S2 induces a conformation change  
69 unmasking the RBD<sup>8</sup>. It is likely that cleavage at S2’ triggers large-scale rearrangements, including  
70 a refolding step that is associated with the separation of S1- and S2-subunits and exposure of a  
71 hydrophobic  $\alpha$ -helix C-terminal to S2’, favoring fusion of viral and host cell membranes leading to  
72 virus entry<sup>9</sup>. Fusion with host cells can occur either at the cell surface (pH-independent) or  
73 following endocytosis of the virus (pH-dependent)<sup>10</sup>. However, the cognate host-cell proteases  
74 responsible for the S1/S2 and S2’ cleavages are not known with certainty, as they may vary between  
75 each coronavirus and cell-type infected<sup>7, 11-14</sup>.

76 The proprotein convertases (PCs; genes *PCSKs*) constitute a family of nine secretory serine  
77 proteases that regulate various processes in both health and disease states<sup>15</sup>. Through proteolysis,  
78 PCs are responsible for the activation and/or inactivation of many secretory precursor proteins,

79 including virus/pathogen surface glycoproteins<sup>15</sup>. Seven PCs, including the widely expressed  
80 furin, PC5A, PACE4 and PC7 cleave secretory substrates at specific single/paired basic amino  
81 acids (aa) within the motif (K/R)-X<sub>n</sub>-(K/R)↓, where X<sub>n</sub>= 0, 2, 4 or 6 spacer X residues<sup>15</sup>.  
82 Because of their critical functions, PCs, especially the ubiquitously expressed furin<sup>16</sup>, are  
83 implicated in many viral infections *via* specific cleavages of envelope glycoproteins, a condition  
84 that allows not only the fusion of the viral lipid envelop with host cell membranes<sup>15</sup>, but also for  
85 cell-to-cell fusion (syncytia) of certain viruses leading to important cytopathogenic effects<sup>17, 18</sup>.  
86 As the S1/S2 cleavage is thought to play a critical role for virus pH-independent entry, the  
87 efficacy and extent of this activation step by host proteases might be a key determinant  
88 regulating cellular tropism, viral pathogenesis and human-to-human transmission. In contrast to  
89 SARS-CoV-1, the proS of SARS-CoV-2 contains a structurally exposed **PRRAR**<sub>685</sub>↓**SV** motif<sup>7</sup>,  
90 <sup>19</sup> (Fig. 1A), which corresponds to a canonical furin-like cleavage site<sup>15, 19</sup>. This furin-like motif  
91 is presumably cleaved during *de novo* virus egress<sup>18</sup> for S-protein priming and may provide a key  
92 role for the efficient spread of SARS-CoV-2 to various human tissues compared to the more  
93 limited tropism of other lineage B β-coronaviruses<sup>19, 20</sup>. Furthermore, based on the S2' sequence  
94 of SARS-CoV-2, we proposed<sup>19</sup> that furin-like enzymes could also cleave the latter site at  
95 **KPSKR**<sub>815</sub>↓**SF**<sup>15</sup> (Fig. 1A). In addition, it was also suggested that the cell surface type-II  
96 transmembrane serine protease 2 (TMPRSS2) independently enhances fusion by cleavage at an  
97 S2'-like site, and that S1/S2 cleavage is mostly furin-dependent<sup>14</sup>. However, the ability of the  
98 Arg/Lys-specific TMPRSS2 to directly cleave at S2' has not been experimentally demonstrated,  
99 but was inferred from the viral entry blockade by the relatively non-specific TMPRSS2 inhibitor  
100 Camostat<sup>21, 22</sup>. Thus, it is possible that one or more proteases can regulate SARS-CoV-2 entry  
101 into human airway epithelial cells<sup>14, 20</sup>. Furthermore, since the tissue-expression of TMPRSS2 is

102 restricted to a limited set of cell types compared to that of the ubiquitously expressed furin, the  
103 activity of the latter was suggested to be critical to extend viral tropism<sup>23</sup>.

104 In the present study, we used various *in vitro* and *ex vivo* cell biology approaches to decipher the  
105 implication of furin-like convertases and TMPRSS2 in S-protein processing. This included the  
106 kinetic analysis of the furin-cleavage of peptides mimicking the S1/S2 and S2' sites, as well as  
107 cellular co-expression proS with the widely expressed PCs<sup>15</sup>. Furin and PC5A were shown to induce  
108 effective priming of proS at S1/S2 but were less efficient at cleaving S2', unless ACE2 was co-  
109 expressed. We also provide evidence that TMPRSS2 does not cleave proS at S1/S2 or S2' but it can:  
110 (i) cleave/inactivate proS into endoplasmic reticulum (ER)-resident S2a/S2b products; (ii) shed  
111 ACE2 into the medium as soluble sACE2; (iii) cleave the S1-subunit into a shorter secreted S1' that  
112 binds sACE2. Furthermore, we present for the first time the effectiveness of three non-toxic, cell-  
113 permeable small molecule furin-like inhibitors (BOS) that resulted in sustained intracellular  
114 inhibition of proS processing at S1/S2 and S2' by endogenous cellular furin-like proteases. All three  
115 BOS-inhibitors blocked cell-to-cell fusion and strongly impaired infection of the lung-derived  
116 epithelial cell line Calu-3 by pseudovirions or by replication-competent SARS-CoV-2, an antiviral  
117 effect potentiated by Camostat. This reveals a crucial role of furin at the portal of viral entry and  
118 highlights an indirect role of TMPRSS2 in promoting infectivity, thus supporting furin-inhibitors  
119 alone or in combination with TMPRSS2-blocking agents as potent antivirals against acute SARS-  
120 CoV-2 infection.

121  
122

## 123 **Results**

124 **ProS processing by furin-like convertases and TMPRSS2.** The susceptibility to furin-cleavages  
125 of SARS-CoV-2' S-glycoprotein was first assessed *in vitro*. Incubation of quenched fluorogenic  
126 peptides encompassing S1/S2 and S2' sites (Supplementary Table 1), demonstrated that the S1/S2

127 cleavage of SARS-CoV-2 is efficiently hydrolysed by furin at pH 7.5 and less at pH 6, whereas the  
128 SARS-CoV-1 S1/S2 and MERS-CoV are poorly cleaved (Fig. 1B). Furin less efficiently cleaved the  
129 SARS-CoV-2 and MERS-CoV at S2', requiring 50-fold higher enzyme concentrations to detect  
130 cleavage (inset Fig. 1B). The high specificity of the SARS-CoV-2 to cleavage at furin-like motifs  
131 was next confirmed by demonstrating that the substitution of basic residues at the S1/S2 cleavage site  
132 (RRA~~A~~<sub>685</sub>↓S, ~~A~~RA~~A~~<sub>685</sub>↓S, ~~A~~RAR<sub>685</sub>↓S) dramatically impaired the S1/S2 cleavage (Fig. 1C).  
133 Altogether these data showed that furin best cleaves at S1/S2 and less efficiently at S2'. Based on  
134 Camostat inhibition, TMPRSS2 was also proposed to participate in SARS-CoV-2 entry in some  
135 cells<sup>14, 20</sup>. Accordingly, we tested whether TMPRSS2 can cleave at S1/S2 or S2' *in vitro*.  
136 Unexpectedly, TMPRSS2 that cleaves a peptide mimicking SARS-CoV-1 at S1/S2, was unable to  
137 process SARS-CoV-2 at S1/S2 or S2' (Fig. 1D).

138 To further decipher the cellular role of furin-like enzymes, we expressed the S-protein in number of  
139 cell lines, whereby HeLa cells were selected as they showed evident endogenous processing of the S-  
140 protein. Thus, we co-transfected HeLa cells with a plasmid containing a codon-optimized cDNA  
141 coding for V5-tagged proS (Fig. 1A) with cDNAs encoding PC5A, furin, PC7 and PACE4<sup>15</sup>. Cell  
142 lysates were analyzed by Western blot (WB) after SDS-PAGE separation and probed with a V5-  
143 mAb<sup>24</sup>. We observed that endogenous protease(s) expressed in HeLa cells can process proS, likely at  
144 S1/S2, into a ~100 kDa S2'-like product (Fig. 1E). Furthermore, only overexpression of furin and  
145 PC5A enhanced the production of the less abundant ~75 kDa S2'-like fragment (Fig. 1E). The  
146 remaining ~200 kDa proS<sub>im</sub> corresponds to an immature precursor form that has not exited the ER, as  
147 attested by its sensitivity to endoglycosidase-F and endoglycosidase-H (Supplementary Fig. 1A), and  
148 insensitivity to furin-like convertases that are only active in the *trans* Golgi network (TGN) and/or  
149 cell surface/endosomes<sup>15</sup>.

150 The double Ala-mutant [R682A + R685A] (denoted  $\mu$ S1/S2) of the S1/S2 site **RRAR**<sub>685</sub>↓S  
151 eliminated the P4 and P1 Arg critical for recognition by furin-like enzymes<sup>15</sup>, and completely  
152 abrogated processing of proS at S1/S2 and putative S2' by endogenous enzymes or by overexpressed  
153 furin (Fig. 1F). These data support a role of furin in the S1/S2 cleavage and revealed that the latter  
154 may be a prerequisite for the subsequent S2' processing. The loss of furin-like cleavage at S1/S2  
155 resulted in the accumulation of a higher molecular sized proS<sub>m</sub> (~230 kDa), which likely represents a  
156 mature form of this precursor that exited the ER and became endoglycosidase-H-resistant but  
157 remained endoglycosidase-F-sensitive (Supplementary Fig. 1A)<sup>15,24</sup>. The cell-permeable PC-  
158 inhibitor decanoyl-RVKR-cmk (RVKR) effectively prevented the endogenous formation of S2, but  
159 not the cell-impermeable D6R inhibitor<sup>24</sup>, suggesting that proS cleavage by furin into S1 and S2  
160 occurs intracellularly and not at the cell surface (Supplementary Fig. 1B).

161 To better define the Arg-residues critical for processing at S1/S2, we expressed in HeLa cells the  
162 proS carrying single residue mutations: R682A, R685A and S686A in the absence or presence of  
163 overexpressed furin (Fig. 2A). The latter was based on the prediction that Ser<sub>686</sub> could be O-  
164 glycosylated<sup>25</sup>, which may hamper processing at S1/S2. However, like the WT, the S686A mutant  
165 was processed by furin into S2 and S2' (Fig. 2A). The data confirmed the critical importance of P4-  
166 Arg<sub>682</sub> or P1-Arg<sub>685</sub> for the generation of S2 by endogenous furin. However, in contrast to the  $\mu$ S1/S2  
167 double Ala mutant (Fig. 1F), these single mutants were partially cleaved under conditions of excess  
168 furin (Fig. 2A). This reflects the multi-basic nature of the S1/S2 recognition sequence **RRAR**<sub>685</sub>↓S,  
169 whereby **ARAR**<sub>685</sub> and **RRAA**<sub>685</sub> are cleavable, but not ARAA<sub>685</sub> ( $\mu$ S1/S2), suggesting the  
170 importance of the P3 site<sup>26</sup>. Finally, Ala-mutants of each underlined residue in S2':  
171 KPSKR<sub>815</sub>↓SFIE<sup>15</sup> resulted in an ER-retained S-protein (*not shown*).

172 We next examined the processing of proS by TMPRSS2 in HeLa cells (Fig. 1F). In accordance  
173 with our *in vitro* data (Fig. 1D), overexpressed TMPRSS2 did not cleave proS at S1/S2 or S2', but

174 rather generated two minor distinct C-terminal products, herein called S2a (~85 kDa) and S2b (~70  
175 kDa). These fragments were seen with both wild-type (WT)-S and its  $\mu$ S1/S2 mutant (Fig. 1F),  
176 revealing that they are S1/S2-independent. The S2 product generated by endogenous furin-like  
177 enzymes is absent when TMPRSS2 is co-expressed with WT proS (Fig. 1F), suggesting that  
178 TMPRSS2 generates S2a and S2b before proS encounters endogenous active furin, i.e., before the  
179 TGN<sup>27</sup>. Indeed, like proS<sub>im</sub>, both S2a and S2b are endoglycosidase-H-sensitive (Supplementary Fig.  
180 1C), indicating that they are generated in the ER and can no longer exit this compartment. Thus, high  
181 levels of TMPRSS2 would effectively inactivate S2 by preventing its ER-exit to reach the cell  
182 surface. As expected, single-Arg mutations in the S1/S2 site did not affect the ability of TMPRSS2 to  
183 generate S2a and S2b (Fig. 2A).

184 The implication of ACE2 in the processing of proS in HeLa cells was next assessed by co-  
185 expression of proS with furin or TMPRSS2 in the absence or presence of ACE2. While not  
186 significantly affecting S1/S2 cleavage, the expression of ACE2 strongly enhanced the generation of  
187 smaller-sized S2' by furin, and S2b by TMPRSS2 (Fig. 2B), likely reflecting a change in the proS  
188 conformation upon ACE2-binding<sup>8,28</sup>.

189

190 **Furin-inhibitors block S1/S2 cleavage, without affecting TMPRSS2 processing.** We next  
191 evaluated three novel non-toxic, cell-permeable furin-inhibitors developed by Boston  
192 Pharmaceuticals available as oral (BOS-981, BOS-318) or inhalable (BOS-857) formulations  
193 (chemical motif and a representative structure of BOS-318 are shown in Figs. 3A,B).  
194 Accordingly, we first tested *in vitro* the efficacy and selectivity of these inhibitors on purified  
195 soluble forms of furin, PC5A, PACE4 and PC7. The enzymatic activity was determined using a  
196 quenched fluorogenic substrate FAM-**QRVRR**AVGIDK-TAMRA, and compared to those  
197 obtained with the known PC-inhibitor RVKR-cmk<sup>24</sup>. The data showed that all three inhibitors



198 effectively blocked the processing of the above dibasic substrate by all convertases with an  $IC_{50}$   
199 of  $\sim 7-9$  nM compared to  $\sim 9-10$  nM for RVKR-cmk (Fig. 3C). The furin S1/S2 cleavage was also  
200 validated *in vitro* using a 12-residue quenched fluorogenic substrate DABSYL/Glu-  
201 TNSPRRAR↓SVAS-EDANS. The inhibition deduced after hill-plot curve fitting (Fig. 3D) gave  
202 an estimated  $IC_{50}$  of  $4 \pm 0.7$  nM (BOS-981),  $32 \pm 4$  nM (BOS-857) and  $35 \pm 5$  nM (BOS-318).

203 The inhibition of PC-activities by BOS-compounds was next assessed intracellularly using a  
204 cell-based Golgi imaging assay of U2OS cells (*see methods*). The data demonstrated that BOS-  
205 compounds inhibited endogenous furin processing of a dibasic BMP10-mimic<sup>24</sup> with an  $IC_{50}$  of  
206  $\sim 8$  nM *versus* 5 nM for RVKR-cmk (Fig. 3C). The above enzymatic assays showed that all 3  
207 inhibitors can inhibit furin, but may also inhibit other members of the PC-family such as PC5A,  
208 PACE4 and PC7<sup>15</sup>.

209 The effect of BOS-inhibitors was then evaluated on the processing of proS in HeLa cells stably  
210 expressing ACE2 (HeLa-ACE2; Fig. 3E). In agreement with the *in vitro* data (Fig. 3D), BOS-  
211 inhibitors blocked the S1/S2 and S2' processing by endogenous furin-like enzymes, with all  
212 three compounds showing almost complete inhibition at 300 nM (Fig. 3E), comparable to that  
213 obtained with a control 50  $\mu$ M decanoyl-RVKR-cmk. In contrast, in HeLa cells none of the  
214 BOS-inhibitors affected the generation of S2a and S2b by TMPRSS2 (Supplementary Fig. 2), in  
215 agreement with the distinct cleavage specificities of furin and TMPRSS2.

216

217 **TMPRSS2 sheds ACE2 and cleaves S1.** Our data do not support the direct implication of  
218 TMPRSS2 in the generation of S2 or S2', since they revealed that overexpression of TMPRSS2  
219 cleaves proS to generate ER-retained S2a and less so S2b (Fig. 1F, Supplementary Figs. 1B,C) and  
220 does not cleave proS at S2'. To verify that S2a and S2b are generated by TMPRSS2 activity in the  
221 ER, we incubated HeLa-ACE2 cells with 120  $\mu$ M Camostat, known to inhibit TMPRSS2<sup>21</sup>. The data

222 showed that this inhibitor can reach the ER as it blocked the autocatalytic activation of TMPRSS2 at  
223 RQSR<sub>255</sub>↓ (loss of mature ~25 kDa form in the media), prevented the formation of both S2a and S2b  
224 with increasing concentrations of TMPRSS2, and gradually allowed the resumption of the furin-like  
225 cleavage at S1/S2 (Supplementary Fig. 3A).

226 Accordingly, we sought to explore other functions that TMPRSS2 may exert to explain its reported  
227 enhancement of viral entry<sup>13, 14, 20</sup>. Hence, we expressed increasing amounts of TMPRSS2 in HeLa-  
228 ACE2 cells and followed processing and/or levels of the S1-subunit in the media by WB-analysis  
229 using an anti-S1 antibody. We showed that TMPRSS2 cleaved the furin-generated S1-subunit (~135  
230 kDa) into a shorter S1' fragment (~115 kDa) secreted into the medium (Supplementary Fig. 3A).  
231 This cleavage may enhance the efficacy of separation of the S1-ACE2 complex and S2-domain  
232 before membrane fusion by the S2-subunit<sup>28</sup>. It was previously reported that TMPRSS2 sheds ACE2  
233 into a soluble form (sACE2)<sup>29</sup>, and the latter activity was associated with enhanced kinetics of cell-  
234 to-cell fusion (syncytia) and SARS-CoV-1 uptake. In agreement, overexpression of TMPRSS2 in  
235 HeLa-ACE2 cells enhanced the shedding of ACE2 into ~120 and ~95 kDa sACE2 forms. The  
236 generation of sACE2 and in large part S1' are both inhibited by 120 μM Camostat (Supplementary  
237 Fig. 3A). Note that the small background shedding of ACE2 is not sensitive to Camostat, suggesting  
238 that another endogenous protease, possibly ADAM17<sup>29</sup>, is also implicated in ACE2 shedding. Co-  
239 immunoprecipitation experiments showed that sACE2 and S1' are found as a complex in the media  
240 (Supplementary Fig. 3B). Incubation of HeLa cells expressing S with media containing sACE2 and  
241 active mature ~25 kDa TMPRSS2m generated by co-expression of full length ACE2 with  
242 TMPRSS2 in HEK293 cells revealed that sACE2 enhanced the levels of S2' in cells and S1 in media  
243 (Supplementary Fig. 4A). Finally, co-expression of TMPRSS2 with WT proS or its μS1/S2 mutant  
244 in HeLa cells in the absence or presence of ACE2 resulted in the similar generation of: (i) secreted  
245 S1' only in the presence of ACE2 and (ii) secreted sACE2 (Supplementary Fig. 4B). Furthermore,

246 these data revealed that furin-processing at S1/S2 is not a prerequisite for these TMPRSS2-mediated  
247 cleavages.

248

249 **Effect of BOS-981 on S-protein trafficking and syncytia formation.** We next performed  
250 immunocytochemical analyses of HeLa cells co-expressing the WT-S-protein or its  $\mu$ S1/S2 mutant  
251 with ACE2 in the absence or presence of 1  $\mu$ M BOS-981 under non-permeabilized (NP; S2 and  
252 ACE2 antibodies) and permeabilized (P; V5 and ACE2 antibodies) conditions (Supplementary Fig.  
253 5). In the absence of BOS-981, the S-protein and ACE2 co-localized abundantly at the cell surface  
254 (Supplementary Fig. 5A-a). HeLa cells expressing both S-protein and ACE2 formed many syncytia,  
255 associated with reduced cell surface expression of the S-protein, and an even greater reduction of  
256 ACE2 (Supplementary Fig. 5A-b). Cells expressing both  $\mu$ S1/S2 and ACE2 showed an accumulation  
257 of both proS and ACE2 inside the cells and at the cell surface (Supplementary Fig. 5A-c). However,  
258 they barely induced the formation of syncytia, and when they did, the cell surface expression of S-  
259 protein and to a lesser extent ACE2 were decreased (Supplementary Fig. 5A-d). In the presence of 1  
260  $\mu$ M BOS-981, S-expressing HeLa cells (Supplementary Figs. 5B-a,b) phenocopy those expressing  
261  $\mu$ S1/S2 (Supplementary Figs. 5B-c,d).

262 Having established that S-protein and ACE2 co-localize at the cell surface, we next analyzed the  
263 impact of furin-cleavage at S1/S2 on the ability of S-protein to induce cell-to-cell fusion. Thus, we  
264 developed a luminescence-based assay using HeLa TZM-bl reporter cells stably transfected with an  
265 HIV-1-based vector expressing luciferase under the control of the HIV-1 long terminal repeat (LTR),  
266 which can be activated by HIV Tat protein. These cells endogenously express the HIV receptor CD4  
267 and its co-receptors CCR5 and CXCR4<sup>30</sup>. We postulated that fusion of donor WT HeLa cells  
268 (expressing Tat and the fusogenic S-protein) with acceptor TZM-bl cells expressing ACE2 would  
269 result in accrued luciferase activity (Fig. 4A). Indeed, as a proof-of-principle, when donor cells

270 expressing HIV gp160 and Tat fuse with TZM-bl acceptor cells, luciferase activity increases  
271 compared to that observed in TZM-bl control cells co-cultured with donor HeLa cells expressing only  
272 Tat. (Supplementary Fig. 6C). The expression of S-protein in HeLa cells did not induce fusion with  
273 TZM-bl control cells (Supplementary Figs. 6A,C). However, ACE2 expression in TZM-bl allowed  
274 fusion with HeLa-expressing SARS-CoV-2' S-protein in a dose-dependent manner (Supplementary  
275 Fig. 6B). The linearity of our assay (correlation coefficient of 0.87) validated the use of luminescence  
276 as an indicator of cell-to-cell fusion. Conversely, expression of  $\mu$ S1/S2 in donor cells did not  
277 enhance fusion with TZM-bl expressing ACE2 and >60% fusion-inhibition was observed upon  
278 incubation of cells with 300 nM of BOS-inhibitors or 10  $\mu$ M of the PC-inhibitor RVKR-cmk (Fig.  
279 4B), indicating that S1/S2 cleavage promotes ACE2-dependent cell-to-cell fusion.

280 To assess, the role of TMPRSS2 in cell-to-cell fusion, we first co-expressed TMPRSS2 with S-  
281 protein or with  $\mu$ S1/S2 in donor cells. In agreement with our cell-biology data (Figs. 1F,2),  
282 TMPRSS2 abolished the fusogenic activity of S, providing evidence that TMPRSS2-mediated  
283 retention of S-protein in the ER by the generation of S2a and S2b impaired the cell-to-cell fusion  
284 activity of S-protein at the plasma membrane (Fig. 4C). However, co-expression of TMPRSS2 and  
285 ACE2 in acceptor cells tended to enhance the fusion with donor S-containing cells, an effect much  
286 more evident with  $\mu$ S1/S2-containing donor cells, resulting in similar cell-to-cell fusion between  
287 donor cells expressing either WT-S or  $\mu$ S1/S2 and acceptor ACE2-TMPRSS2 cells (Fig. 4D). This  
288 phenotype suggests that in the absence of furin-cleavage ( $\mu$ S1/S2) the TMPRSS2-generated S1'  
289 (Supplementary Fig. 4B) releases the N-terminal part of S1, thereby favoring furin-cleavage at S2'  
290 and cell-cell-fusion. Indeed, co-expression of ACE2 with various doses of TMPRSS2 in acceptor  
291 cells gradually promoted the fusion of the  $\mu$ S1/S2 to similar levels as the WT-S-induced fusion  
292 (Supplementary Fig. 7, left panels). However, sACE2 alone had no effect on  $\mu$ S1/S2 (Supplementary  
293 Fig. 7, right panel), as the S2' site would still be capped by the un-cleaved S1-subunit. Thus, only

294 high levels of TMPRSS2 in ACE2-acceptor cells allow similar fusion with donor cells expressing  
295 WT-S and  $\mu$ S1/S2. Interestingly, overexpression of a soluble form of ACE2 (sACE2) in acceptor  
296 cells also significantly enhanced fusion with donor cells containing WT-S (Supplementary Fig. 7,  
297 right panel). This may possibly occur *via* binding of the sACE2-S1 complex to a receptor on acceptor  
298 cells to promote cell-to-cell fusion, e.g., to integrins *via* their RGD motifs<sup>31</sup> or S1-binding to  
299 neuropilin1,2<sup>32</sup>.

300

301 **Effects of furin inhibitors on entry of pseudoviruses.** To assess the importance of spike processing  
302 at the S1/S2 site in SARS-CoV-2 entry, we pseudotyped gp160-defective HIV with WT or  $\mu$ S1/S2  
303 S-protein and tested viral entry in different target cells. Using lung Calu-3 and kidney HEK293T-  
304 ACE2 as model target cells, we found that cell-entry of viruses expressing  $\mu$ S1/S2 were completely  
305 defective in Calu-3, but not in 293T-ACE2 that exhibited enhanced viral-entry (Fig. 5A), similar to  
306 Vero E6 cells<sup>33</sup>. Since SARS-CoV-2 can enter target cells *via* “pH-independent” or “pH-dependent”  
307 pathways and the virus reportedly uses the latter to infect Vero E6 cells<sup>34</sup>, we asked whether SARS-  
308 CoV-2 entered the 293T-ACE2 cells through the endocytic pathway. Indeed, the pH-raising  
309 chloroquine<sup>35</sup> efficiently blocked entry of pseudotyped SARS-CoV-2 and its  $\mu$ S1/S2 mutant  
310 (Supplementary Fig. 8), suggesting that in the 293T-ACE2 system, the S-protein that mediates viral  
311 entry is activated by endosomal pH-dependent proteases. This agrees with the fact that HEK293 cells  
312 allow endocytosis of pseudovirions carrying SARS-CoV-2 spike protein *via* clathrin-coated  
313 vesicles<sup>36</sup>.

314 Given the contrasting effects of  $\mu$ S1/S2 in 293T-ACE2 and Calu-3 cells, we hypothesized that  
315 inhibiting S processing by furin-like convertases would mainly block viral entry in Calu-3 but not in  
316 293T-ACE2 cells. Indeed, when 293T17 producing cells were treated with BOS-inhibitors during  
317 viral packaging, HIV particles expressing the WT proS-protein remained highly infectious in 293T-

318 ACE2 but were completely defective in Calu-3 (Fig. 5B; Supplementary Fig. 9). Thus, BOS-  
319 inhibitor treatment phenocopied the effect of the  $\mu$ S1/S2 in both target cells. Importantly, these  
320 phenotypes were not due to increased pseudoviral production/release since levels of HIV p24 were  
321 comparable in all cases (Fig. 5C). Similarly, in the presence of 1  $\mu$ M BOS-inhibitor, processing of  
322 WT-S was clearly impaired, while the overall  $\mu$ S1/S2 expression profile was not affected (Fig. 5C).  
323 Collectively, our data indicate that processing of S-protein by furin-like convertases is essential for  
324 the pH-independent viral entry in Calu-3 cells but not in HEK293 cells stably expressing ACE2  
325 where the virus enters by the endocytic pathway.

326

327 **Furin-like inhibitors reduce virus production in SARS-CoV-2-infected cells.** The possible  
328 antiviral effects of these furin-like inhibitors on SARS-CoV-2 replication was evaluated in Calu-  
329 3 cells pretreated with 1  $\mu$ M BOS-inhibitors 24h before infection with laboratory isolated SARS-  
330 CoV-2 virus (MOI: 0.01) and harvested at 12, 24 and 48h post infection for plaque assay  
331 analysis. BOS-inhibitors significantly decreased viral titers at 12, 24 and 48h post-infection (Fig.  
332 6A). We further evaluated the inhibitory effect of various doses of these inhibitors on the yield of  
333 infectious virus produced 24h post-infection and found that the titer of progeny viruses was  
334 reduced by more than 30-fold with 1  $\mu$ M BOS-318, although the inhibitory effect could be  
335 observed starting at 0.25  $\mu$ M (Fig. 6B; left panel). As well, the  $IC_{50}$  and selectivity index (SI)<sup>37</sup>  
336 of BOS-318 were found to be 0.2  $\mu$ M and 475, respectively, underlining the inhibitor's *bona fide*  
337 efficacy (Fig. 6B; right panel). A similar analysis with BOS-857 and BOS-981 revealed  
338 comparable antiviral effects and selectivity index (Supplementary Figs. 10A,B). Importantly, the  
339 levels of viral spike (full length and cleaved S) and nucleocapsid proteins in Calu-3 cells treated  
340 with different doses of BOS-318 and the corresponding progeny virus levels were similarly  
341 decreased (Fig. 6C), underscoring the crucial role played by furin-like convertases in the

342 production of infectious SARS-CoV-2 during infection of lung epithelial cells. In addition, the  
343 antiviral effect of these inhibitors for SARS-CoV-2 infection was also evaluated in Vero E6, a  
344 cell target that is reported to be primarily infected *via* the endocytic pathway<sup>7, 20</sup>. In this system,  
345 the best inhibitory effect with 1  $\mu$ M BOS-318 demonstrated a modest ~5.7-fold decrease in virus  
346 production sustained over a 12-48h infection period (Supplementary Fig. 11), possibly reflecting  
347 some furin-activity in endosomes<sup>27</sup>.

348 Based on the SI of BOS-inhibitors in Vero E6 and Calu-3 cells, BOS-981 was further used in  
349 combination with Camostat to explore a potential synergistic effect of these inhibitors on viral  
350 replication in Calu-3 cells. To this end, it was observed that the two inhibitors could individually  
351 and meaningfully reduce viral replication, but their co-treatment (1  $\mu$ M BOS-981 + 100  $\mu$ M  
352 Camostat) inhibited >99% of progeny viruses (Fig. 6D). This highlights a synergistic effect of  
353 these drugs and the importance of endogenous furin-like proteases, and presumably TMPRSS2,  
354 in the efficient infection of Calu-3 cells by SARS-CoV-2.

355

## 356 Discussion

---

357 Herein, we analyzed the implication of furin<sup>12, 14, 19, 20</sup> and TMPRSS2<sup>14, 20</sup> in proS-processing, S-  
358 induced cell-to-cell fusion, SARS-CoV-2 entry and infectivity of various cell lines. *In vitro* furin  
359 cleaves at S1/S2 and S2' sites, S1/S2-cleavage activity is blocked by BOS-inhibitors (Fig. 3D), but  
360 TMPRSS2 does not cleave at either site (Figs. 1B-D). In cells furin and less so PC5A can induce an  
361 additional cleavage at S2', which is likely essential to release the fusion peptide (Fig. 1E), and S2'-  
362 processing was strongly enhanced in the presence of ACE2 (Fig. 2B). It is possible that the  
363 interaction of the S1-subunit that contains the RBD with ACE2 induces a conformational change  
364 favoring S2'-processing by cognate convertases<sup>28</sup>. We propose that furin first processes proS at



365 S1/S2, generating the cleaved S1- and S2-subunits that remain non-covalently bound<sup>12,38</sup>. Separation  
366 of these subunits in the presence of ACE2 would then favor furin-cleavage at S2' and cellular fusion.  
367 BOS-inhibitors effectively blocked the generation of S2 and S2' by endogenous furin-like enzymes  
368 in HeLa-ACE2 cells (Fig. 3E). Immunocytochemical data confirmed that ACE2 co-localized at the  
369 cell surface of HeLa cells with WT-S and its  $\mu$ S1/S2 mutant in the presence/absence of BOS-  
370 inhibitors, suggesting that cleavage at S1/S2 does not affect the cell-surface co-localization of S-  
371 protein and ACE2 (Supplementary Fig. 5). Notably, expression of  $\mu$ S1/S2 or treatment with BOS-  
372 inhibitors prevented cell-to-cell fusion at the plasma membrane (Fig. 4), indicating that furin-  
373 cleavage may favor fusion at the plasma membrane and therefore allow the pH-independent entry of  
374 the virus. Thus, S-processing by furin is essential for pseudoviral entry in Calu-3 cells and abrogating  
375 this process with BOS-inhibitors effectively renders the pseudovirions defective. Finally, our data  
376 support a critical role of these furin-inhibitors to meaningfully reduce viral infection and production  
377 of infectious progeny virus in human lung cells (Fig. 6).

378 Unexpectedly, we showed that in HeLa and HeLa-ACE2 cells TMPRSS2 induces the cleavage of  
379 proS into S2a and S2b products in the ER (Figs. 1F, 2B). Accordingly, high levels of TMPRSS2 in  
380 donor cells expressing S-protein abolishes cell-to-cell fusion (Fig. 4C). Conversely, overexpression  
381 of cell-surface localized TMPRSS2 with ACE2 in acceptor cells slightly enhances S-induced fusion  
382 of donor cells, possibly *via* TMPRSS2 cleavage of S1 into S1' and the secretion of sACE2 that  
383 associates with S1' (Supplementary Fig. 3). The generation of S1' by TMPRSS2 likely facilitates the  
384 exposure of the S2' cleavage site<sup>7,33</sup>, which would then lead to more effective furin-cleavage at S2'  
385 thereby allowing membrane fusion. In agreement, donor cells synthesizing  $\mu$ S1/S2 only fuse with  
386 acceptor cells expressing both TMPRSS2 and ACE2 (Fig. 4D). However, our data show that virions  
387 emanating from Calu-3 cells are infectious. It is possible that the endogenous levels of TMPRSS2 in  
388 acceptor Calu-3 cells are insufficient to inactivate proS in the ER (Supplementary Fig. 3A), and that



389 at physiological levels this enzyme exerts its effects primarily at the cell surface. In addition, the  
390 membrane (M)-protein and/or envelope (E)-protein of SARS-CoV-2 may shield the proS-protein  
391 from early TMPRSS2-induced inactivation in the ER<sup>39</sup>.

392 The human airway epithelium is an important site of SARS-CoV-2 infection<sup>14, 20, 40</sup>. The virus can  
393 then disseminate to other tissues/cells such as gut, liver, endothelial cells and macrophages where  
394 ACE2, furin and TMPRSS2 are co-expressed<sup>41</sup> and cause multi-organ dysfunction in COVID-19  
395 patients<sup>42</sup>. The complementarity and interchangeability of these different proteases in allowing  
396 SARS-CoV-2 entry into cells might explain the wider tropism of this virus compared to SARS-CoV-  
397 1<sup>43</sup>. Our data support the presence of two different pathways of SARS-CoV-2 entry<sup>34</sup>, and that only  
398 the pH-independent pathway is efficiently inhibited by BOS ± Camostat (Figs. 5,6; model Fig. 7).  
399 However, the fact that hydroxy-chloroquine therapy failed to show significant improvement in  
400 COVID-19 patients<sup>44</sup> or in two animal models<sup>45</sup>, suggests that the pH-independent pathway is  
401 important for pathogenesis and virus propagation. This is also supported by the fact that the furin-  
402 cleavage at S1/S2 has been conserved in SARS-CoV-2 isolated from human COVID-19 patients, but  
403 that this site is negatively selected for after a few passages in Vero cells<sup>46</sup>.

404 It has been proposed that injection of large amounts of recombinant human sACE2 to individuals  
405 may act as an antiviral by competing with ACE2 for viral entry during the early stages of SARS-  
406 CoV-2 infection<sup>47</sup>. Our data adds complexity to this notion, whereby only large amounts of sACE2  
407 may do so. However, at physiological levels, sACE2 released by TMPRSS2 may also facilitate viral  
408 entry by favoring the separation of the S1- and S2-subunits and S2' processing.

409 BOS-inhibitors represent non-toxic, small molecule inhibitors, that can be delivered orally or  
410 by inhalation, and thus deserve to be rapidly tested to assess their antiviral effect against acute  
411 SARS-CoV-2 infection. As observed in adult animal models, short-term inhibition of furin  
412 would not cause severe side effects, despite the many physiological functions of furin<sup>15</sup>. The

413 combination of BOS- and selective TMPRSS2-inhibitors may thus offer a synergistic and  
414 effective blockade of SARS-CoV-2 entry in the lung (Figs. 6D,7) and a broad spectrum of  
415 tissues, representing a powerful antiviral strategy that deserves *in vivo* validation requiring  
416 studies in animal models.

417 The availability for worldwide distribution of various SARS-CoV-2 vaccines that inhibit the  
418 accessibility of the RBD of S-protein to ACE2 (<https://www.raps.org/news-and-articles/news-articles/2020/3/covid-19-vaccine-tracker>) represent a major therapy to block SARS-CoV-2  
419 infections. However, it is unknown whether they will be effective in patients with impaired  
420 immune systems, and whether they will confer a persistent protection. While the protective effect  
421 of the vaccination on the whole world population remains incomplete, additional effective  
422 antiviral drugs that block viral entry in multiple organs are still needed and could help in early  
423 diagnosis of the disease. Ultimately, in case of new emerging coronavirus pandemics<sup>48</sup>, the  
424 availability of such treatments would constitute a powerful anti-viral arsenal.  
425

426  
427

## 428 **Methods**

---

### 429 **Enzymatic PC-inhibition by BOS-inhibitors**

430 Biochemical assay: The proprotein convertases furin (108-574-Tev-Flag-6His), PC5A (PCSK5;  
431 115-63-Tev-Flag-6His), PACE4 (PCSK6; 150-693-Tev-Flag-6His), and PC7 (PCSK7; 142-634-  
432 Tev-Flag-6His) enzymes were purified from BacMam transduced CHO cells. Reactions were  
433 performed in black 384-well polystyrene low volume plates (Greiner) at a final volume of 10  $\mu$ L.  
434 BOS-inhibitors (BOS-318, BOS-857 and BOS-981) were dissolved in DMSO (1 mM) and  
435 serially diluted 1 to 3 with DMSO through eleven dilutions to provide a final compound  
436 concentration range from 0.00017 to 10  $\mu$ M. 0.05  $\mu$ l of each concentration was transferred to the  
437 corresponding well of an assay plate, and then 5  $\mu$ l of enzyme (furin, PCSK5, PCSK6, and  
438 PCSK7) in assay buffer (100 mM HEPES pH7.5, 1 mM  $\text{CaCl}_2$  and 0.005% Triton X-100) was  
439 added using a Multidrop Combi (Thermo) to the compound plates to give a final protein  
440 concentration of 0.02, 0.5, 2.5, and 1.0 nM respectively. The plates were mixed by inversion,  
441 and following a 30 min preincubation of enzyme with compound at room temperature ( $\sim 22^\circ\text{C}$ ),  
442 the substrate FAM-QRVRRAVGIDK-TAMRA (AnaSpec # 808143, 5  $\mu$ l of a 1, 0.25, 0.20, and  
443 0.5  $\mu$ M solution in assay buffer for furin, PCSK5, PCSK6, and PCSK7 respectively) was added  
444 using a Multidrop Combi to the entire assay plate. The plates were centrifuged at 500Xg for 1  
445 minute and incubated at room temperature for two hours. Enzyme inhibition was then quantified  
446 using an Envision instrument (PerkinElmer). Data were normalized to maximal inhibition  
447 determined by 1  $\mu$ M Decanoyl-Arg-Val-Lys-Arg-Chloromethylketone (Calbiochem #344930).  
448 Golgi imaging assay: This assay uses an image-based platform to evaluate the intracellular  
449 activity of furin inhibitors. Reactions were performed in black 384-well, tissue culture-treated,  
450 clear bottom plates (Greiner). Compounds under analysis were dissolved in DMSO (1.0 mM)

451 and serially diluted 1 to 3 with DMSO through eleven dilutions. This creates a final compound  
452 concentration range from 0.00017 to 10  $\mu$ M, and 0.1  $\mu$ L of each concentration was transferred to  
453 the corresponding well of the assay plate.

454 Cellular assay: Analyses were initiated by the addition of U2OS cells simultaneously transduced  
455 with a BacMam-delivered construct containing a Golgi-targeting sequence followed by a 12-  
456 amino acid furin/PCSK cleavage site from Bone Morphogenic Protein 10 (BMP10) and then  
457 GFP at the C terminus. The dibasic furin cleavage site sequence was flanked by glycine rich  
458 linkers (GalNAc-T2-GGGGS-DSTARIRRNAKG-GGGGS-GFP). Briefly, frozen cells are  
459 thawed in assay media (Dulbecco's Modified Eagles Medium Nutritional Mixture F-12 (Ham)  
460 without phenol red containing 5% FBS) and diluted to deliver 6000 cells/well (50  $\mu$ l) to the plate  
461 using a Multidrop Combi (Thermo). After a 24-hour incubation period at 37°C, the cells are  
462 stained with Cell Mask Deep Red, fixed in paraformaldehyde and the nuclei stained using  
463 Ho333342. The Golgi-targeted GFP forms bright punctate clusters within the cell. In the absence  
464 of a furin/PCSK inhibitor, the endogenous protease cleaves GFP from its N-  
465 acetylgalactosaminyltransferase-2 Golgi tether, releasing GFP into the Golgi lumen where  
466 fluorescence is diluted below the threshold of assay sensitivity. In the presence of a cell  
467 permeable furin/PCSK inhibitor, GFP fluorescence increases as intra-Golgi protease activity is  
468 reduced. Cellular GFP intensity is determined by image-based acquisition (Incell 2200, Perkin  
469 Elmer) at 40x magnification with 4 fields measured per well. Multi-scale top hat segmentation is  
470 used to identify the GFP-tagged puncta and to quantitate the average fluorescence of all puncta  
471 on a per cell basis. Cellular toxicity is determined in parallel.

472 Furin and TMPRSS2 fluorogenic assays: Recombinant furin was purchased from BioLegend  
473 (#719406), TRMPSS2 from Cusabio and the DABCYLGlu-EDANS labelled peptides

474 encompassing the different cleavage sites (Supplementary Table 1) were purchased from  
475 Genscript. Reactions were performed at room temperature in black 384-well polystyrene low  
476 volume plates (CELLSTAR-Greiner Bio-One # 784476) at a final volume of 15  $\mu$ L. The  
477 fluorescent peptides were used at 5  $\mu$ M and the reactions were performed in 50 mM Tris  
478 buffer (pH 6.5 or 7.5), 0.2% Triton X-100, 1mM CaCl<sub>2</sub> and furin was added at a final  
479 concentration of 2-100 nM. BOS-inhibitors (BOS-318, BOS-857 and BOS-981) were dissolved  
480 in DMSO (1 mM) and serially diluted 1 to 2 with DMSO to provide a final compound  
481 concentration range from 50  $\mu$ M to 0.01 nM with 5% DMSO in the enzymatic assay. For  
482 TMPRSS2, the fluorescent peptides were used at 5  $\mu$ M and the reactions were performed in 50  
483 mM Tris buffer (pH 6.5 or 7.5), 0.2% Triton X-100, 50 mM NaCl and TMPRSS2 was added at  
484 final concentrations of 25-100 nM. Cleavage of the synthetic peptides was quantitated by  
485 determining the increase of EDANS (493 nM) fluorescence following release of the DABCYL  
486 quencher, which is excited at 335 nM using a Safire 2 Tecan fluorimeter. The fluorescence was  
487 followed during 90 min, and the enzymatic activity was deduced by measurement of the increase  
488 of fluorescence during the linear phase of the reaction. Each reaction was performed in triplicate  
489 and the standard deviation was calculated using Excel-ecart type function ( $\sqrt{\frac{\sum(x-\bar{x})^2}{(n-1)}}$ ).

## 490 **Plasmids**

491 C-terminal V5 tagged Spike glycoprotein of SARS-CoV-2 (optimized sequence) and its mutants  
492 were cloned into the pIRES2-EGFP vector. Site-directed mutagenesis was achieved using a  
493 Quick-Change kit (Stratagene, CA) according to the manufacturer's instructions. The plasmids  
494 pCI-NEO-hACE2 received from DW Lambert (University of Leeds) and pIRES-NEO3-  
495 hTMPRSS2 from P Jolicoeur (IRCM). The  $\Delta$ Env Vpr Luciferase Reporter Vector (pNL4-  
496 3.Luc.R-E-) was obtained from Dr. Nathaniel Landau through the NIH AIDS Reagent Program

497 whereas the pHIV-1NL4-3  $\Delta$ Env-NanoLuc construct was a kind gift from Dr. P Bieniasz.

498 Plasmids encoding VSV-G, as HIV-1 Env and tat were previously described<sup>49, 50</sup>.

#### 499 **Cell culture and transfection**

500 Monolayers of HeLa, HEK293T, HEK293T17, Vero E6 and Calu-3 cells were cultured in 5%

501 CO<sub>2</sub> at 37°C in Dulbecco's modified Eagle's medium (DMEM; Wisent) supplemented with 10%

502 (v/v) fetal bovine serum (FBS; Wisent). HEK293T-ACE2<sup>51</sup>, a generous gift from Dr. Paul

503 Bieniasz, were maintained in DMEM containing 10% FBS, 1% nonessential amino acids

504 (NEAA) and 50  $\mu$ g/ml blasticidin (Invivogen). The cells were transfected with JetPrime

505 transfection reagent according to the manufacturer's instructions (Polyplus transfection, New

506 York, USA). At 24h post transfection the culture media were changed to serum-free DMEM and

507 incubated for an additional 24h. To establish the stable HeLa cells over-expressing human

508 ACE2, transfected cells were selected using media containing 500  $\mu$ g/ml of neomycin (G418,

509 Wisent).

510 To generate HIV particles pseudotyped with SARS-CoV-2 S, 293T17 cells (600,000 cells

511 plated in a 6-well vessel) were transfected with 1  $\mu$ g pNL4-3.Luc.R-E- (or pHIV-1NL $\Delta$ Env-

512 NanoLuc) in the presence or absence of 0.3  $\mu$ g pIR-2019-nCoV-S V5 plasmids using

513 Lipofectamine-3000 (Life Technologies). In certain experiments, 293T17 cells were treated with

514 BOS inhibitors at 6 h post transfection. Pseudovirions expressing the nano- or firefly-luciferase

515 were collected at 24 h or 48 h post transfection, respectively. Viral supernatants were clarified by

516 centrifugation at 300 x g, passed through a 0.45- $\mu$ m pore-size polyvinylidene fluoride (PVDF;

517 Millipore) syringe filter (Millipore; SLGVR33RS), and aliquots frozen at -80°C. For WB

518 analysis of purified pseudovirions, viral supernatants were concentrated by ultracentrifugation on

519 a 20% sucrose cushion for 3h at 35,000 RPM; Beckman Coulter OPTIMA XE; Ti70.1 rotor).

520 HIV particles lacking the SARS-CoV-2 S glycoprotein served as a negative control in all  
521 experiments.

### 522 **Cell viability assay using MTT**

523 Cells, seeded in a 96-well plate, the day before, at 10,000 (HEK-293T and Vero E6) or 50,000  
524 (Calu-3) cells, were treated with serial 10-fold dilutions of BOS inhibitors for up to 48h. Cells  
525 treated with vehicle alone were used as negative control. MTT was subsequently added to the  
526 medium (final concentration: 2.5 mg/ml) and cells were further incubated for 4h at 37 °C. After  
527 removal of the culture media, DMSO was added and absorbance read at 595 nm using a  
528 microplate spectrophotometer. The data from two independent experiments done in triplicates  
529 was used to calculate the CC50 by nonlinear regression using GraphPad Prism V5.0 software.

### 530 **Western blots**

531 The cells were washed with PBS and then lysed using RIPA buffer (1% Triton X-100, 150 mM  
532 NaCl, 5 mM EDTA, and 50 mM Tris, pH 7.5) for 30 min at 4°C. The cell lysates were collected  
533 after centrifugation at 14,000 × g for 10 min. The proteins were separated on 7% tris-glycine or  
534 8% tricine gels by SDS-PAGE and transferred to a PVDF membrane (Perkin Elmer). When  
535 specified, media from cultured and transfected cells were collected and concentrated 10x using  
536 Amicon Ultra 2 ml devices with a 10 kDa cut-off (Millipore; UFC 201024), as specified by the  
537 manufacturer, and analyzed by SDS-PAGE followed by Western blotting. The proteins were  
538 revealed using a V5-monoclonal antibody (V5-mAb V2660; 1:5000; Invitrogen), ACE2 antibody  
539 (rabbit monoclonal ab108252; 1:3,000; Abcam), TMPRSS2 antibody (rabbit polyclonal; 14427-  
540 1-AP; 1:1,000; Proteintech), Actin antibody (rabbit polyclonal A2066; 1:5,000; Sigma), or  
541 SARS-CoV-2 spike antibody (rabbit polyclonal GenTex GTX135356; 1:2,000; GenTex). The  
542 antigen-antibody complexes were visualized using appropriate HRP conjugated secondary

543 antibodies and enhanced chemiluminescence kit (ECL; Amersham or Bio-Rad) and  
544 normalization was reported to  $\beta$ -actin. The quantification of the bands was performed using  
545 Image Lab software (Bio-Rad).

546 For analysis of SARS-CoV-2 S virions or pseudovirions, protein extracts of purified viral  
547 particles and corresponding producing cells (Calu-3 or 293T17, respectively) were resolved on  
548 10% tris-glycine gels and immunoblotted for spike, nucleocapsid, HIV-1 Gag p24 or actin using  
549 anti-V5 (for pseudovirion detection; V2660)/anti-S2 (for virion detection; Sino Biologicals;  
550 40590-T62), anti-N (Sino Biologicals; 40143-MM05), anti-p24 (MBS Hybridoma line 31-90-25)  
551 or anti-actin (MP Biomedicals, SKU 08691001), respectively.

#### 552 **Glycosidase treatment**

553 30 to 50  $\mu$ g proteins were digested for 90 min at 37°C with endoglycosidase-H (Endo-H;  
554 P0702L) or endoglycosidase-F (Endo-F; P0705S) as recommended by the manufacturer (New  
555 England Biolabs).

#### 556 **Inhibitor treatment**

557 At 24h post transfection, cells were incubated for 6h with two pan-PC inhibitors: the cell  
558 permeable decanoyl-RVKR-chloromethylketone (cmk; 50 mM; 4026850.001; Bachem) , or with  
559 the cell surface PC-inhibitor hexa-D-arginine (D6R; 20  $\mu$ M; 344931; EMD). Culture media were  
560 then replaced with fresh ones containing the inhibitors for an additional 24h. For the selective  
561 cell-permeable furin-like inhibitors (BOS; Boston Pharmaceuticals), the cells were treated with  
562 the inhibitors at the specified concentration starting at 5h pre-transfection and throughout the  
563 duration of the experiment.

564

565



## 566 **Cell-to-cell fusion assay**

567 HeLa or HeLa TzM-bl cells were plated at 200,000 cells in 12-well plates. HeLa cells were  
568 transiently transfected with different constructs of SARS-CoV-2 Spike or NL4.3-HIV Env, or an  
569 empty vector and 0.2 µg of CMV-Tat plasmid. HeLa TzM-bl cells were transfected with human  
570 ACE2, TMPRSS2 or a combination of both. At 6h post-transfection, media were replaced with  
571 fresh ones containing furin-inhibitors, and 24h later the cells were detached with PBS-EDTA (1  
572 µM). Different combinations of HeLa and HeLa-TzM-bl cells were placed in co-culture plate at  
573 a ratio of 1:1 for a total of 60,000 cells/well of a 96 well plate. After 18-24h the media were  
574 removed and 50 µl of cell lysis reagent was added in each well. 20 µl of the cell lysate was used  
575 for luciferase reading using 50 µl of Renilla luciferase reagent (Promega, Madison, WI, USA).  
576 The relative light units (RLU) were measured using a Promega GLOMAX plate reader  
577 (Promega, Madison, WI, USA) and values were reported as fold increase over the RLU  
578 measured in co-culture of HeLa cells transfected EV with respective TzM-bl cells.

## 579 **Microscopy**

580 To establish the luciferase assay, cell co-cultures were plated on glass coverslips. After 18-24h,  
581 the cells were incubated with 488 CellMask™ to stain the membrane and then fixed with 4%  
582 PFA for 15 min at 4°C. The glass coverslips were mounted on glass slides using ProLong™ Gold  
583 Antifade containing DAPI (Invitrogen). The number of syncytia were counted over 10 fields.

## 584 **Immunofluorescence**

585 Cell culture and transfection were performed on glass coverslips. Cells were washed twice with  
586 PBS and fixed with fresh 4% paraformaldehyde for 10 min at room temperature. Following  
587 washes, cells were either non-permeabilized or permeabilized with 0.2% Triton X-100 in PBS  
588 containing 2% BSA for 5 min, washed, and then blocking was performed with PBS containing

589 2% BSA for 1h. Cells were incubated with primary antibodies overnight at 4°C using an  
590 antibody against V5 (mouse monoclonal R960-25; 1:1000; Invitrogen), Spike (mouse  
591 monoclonal GTX632604; 1:500; GeneTex) and ACE2 (goat polyclonal AF933; 1:500;  
592 RnDsystems). Following wash, corresponding species-specific Alexa-Fluor (488 or 555)-tagged  
593 antibodies (Molecular Probes) were incubated for 1h at room temperature. Coverslips were  
594 mounted on a glass slide using ProLong Gold Reagent with DAPI (P36935, Life Technologies).  
595 Samples were visualized using a confocal laser-scanning microscope (LSM710, Carl Zeiss) with  
596 Plan-Apochromat 63x/1.40 Oil DIC M27 objective on ZEN software.

#### 597 **Pseudovirus entry**

598 293T-ACE2 or Calu-3 (10,000 cells/well plated in a 96-well dish the day before) were incubated  
599 with up to 200 µl filtered pseudovirions for overnight. Viral inoculum was removed, then fresh  
600 media were added, and the cells cultured for up to 72h. Upon removal of spent media, 293T-  
601 ACE2 and Calu-3 cells were gently washed twice with PBS and analyzed for firefly- or nano-  
602 luciferase activity, respectively using Promega luciferase assay (Cat # E1501) or Nano-Glo  
603 luciferase system (Cat # N1110), respectively.

#### 604 **Replication competent SARS-CoV-2 Viruses**

605 SARS-CoV-2, which served as the viral source, was originally isolated from a COVID-19  
606 patient in Quebec, Canada and was designated as LSPQ1. The clinical isolate was amplified,  
607 tittered in Vero E6 using a plaque assay as detailed below, and the integrity of the S-protein  
608 multi-basic protein convertase site validated by sequencing. All experiments involving infectious  
609 SARS-CoV-2 virus were performed in the designated areas of the Biosafety level 3 laboratory  
610 (IRCM) previously approved for SARS-CoV-2 work.

611

## 612 **Plaque assay in Vero E6**

613 Vero E6 cells ( $1.2 \times 10^5$  cells/well) were seeded in quadruplicate in 24-well tissue culture plates  
614 in DMEM supplemented with 10% FBS two days before infection. Cells were infected with up  
615 to six ten-fold serial dilutions ( $10^{-2}$ - $10^{-6}$ ) of viral supernatant containing SARS-CoV-2 for 1h at  
616  $37^\circ\text{C}$  (200  $\mu\text{l}$  infection volume). The plates were manually rocked every 15 min during the 1-  
617 hour period. Subsequently, virus was removed, cells were washed and overlaying media  
618 (containing 0.6% low melt agarose in DMEM with 10% FBS) was added and incubated  
619 undisturbed for 60-65h at  $37^\circ\text{C}$ . Post incubation, cells were fixed with 4% formaldehyde and  
620 stained with 0.25% crystal violet (prepared in 30% methanol). High quality plaque pictures were  
621 taken using a high resolution DSLR camera (Nikon model: D80, objective: “AF Micro-Nikkor  
622 60mm f/2.8D”). Plaques were counted manually and in parallel, imaged plaque plates were  
623 processed and plaques enumerated using an automated algorithm based Matlab software. Virus  
624 titer is expressed as plaque-forming units per ml (PFU/ml): (number of plaques x dilution factor  
625 of the virus) x 1000 / volume of virus dilution used for infection (in  $\mu\text{l}$ ). Multiplicity of infection  
626 (MOI) expressed as:  $\text{MOI} = \text{PFU of virus used for infection} / \text{number of cells}$ .

## 627 **Cell infections with fully replicative SARS-CoV-2**

628 Vero E.6 and Calu-3 cells were seeded in duplicates in 12-well plates ( $2.3 \times 10^5$  cells/well) the  
629 day before. Cells were pre-treated with various concentrations (0.1-1 $\mu\text{M}$ ) of BOS inhibitors and  
630 vehicle alone (DMSO) for up to 24h. In certain experiments, Calu-3 were also pre-treated with  
631 Camostat for 1h. Thereafter, the cells were infected with SARS-CoV-2 virus at MOI of 0.001 for  
632 1h (Vero E6) or 0.01 for 3h (Calu-3 cells) in 350  $\mu\text{l}$  of serum-free DMEM at  $37^\circ\text{C}$  with  
633 occasional manual rocking of plates. Cells plus media only were used as a control. After  
634 incubation, virus was removed, and the cell monolayer was washed twice successively with PBS  
635 and serum-free DMEM. New media (total 1ml) containing the concentrations of BOS-inhibitors

636 was subsequently added to cells. Cell-free supernatant (250  $\mu$ l) was removed at 12, 24 and 48h  
637 post infection. The drugs were replenished for 1 ml media at 24h post-infection. The virus  
638 supernatants were stored at -80°C until further use. Viral production in the supernatant was  
639 quantified using a plaque assay on Vero E6.1 cells as described above. In certain experiments,  
640 viral supernatants were harvested at the end of infection and purified on a 20% sucrose cushion  
641 using ultracentrifugation as described above. The resulting concentrated virus and corresponding  
642 infected cells were analyzed by Western blotting as appropriate.

643 Quantification and statistical analysis: Virus titers quantified by plaque assay in triplicate were  
644 shown as mean  $\pm$  standard deviation. The results from experiments done in triplicates were used  
645 to calculate the IC<sub>50</sub> by nonlinear regression using GraphPad Prism V5.0 software. The  
646 difference between the control cells (virus with 0.001% DMSO) and the cells treated with BOS-  
647 inhibitors were evaluated by Student's t test. The P values of 0.05 or lower were considered  
648 statistically significant (\*,  $p < 0.05$ ; \*\*,  $p < 0.01$ ; \*\*\*,  $p < 0.001$ ).

649

650

## 651 **Acknowledgments**

---

652 This work was supported in part by CIHR Foundation grants (NGS: # 148363) and (ÉAC: #  
653 154324), a Canada Research Chairs in Precursor Proteolysis (NGS: # 950-231335), a CIHR  
654 Team Grant # HAL 157986 (NGS and ÉAC), Réseau SIDA maladies infectieuses COVID-19  
655 initiative (ÉAC and NGS) and , ANR Reacting COVID-19 (ED and BC). The authors thank the  
656 Quebec public health laboratory for providing the infectious isolate LSPQ1 SARS-CoV-2. We  
657 thank Paul Bieniasz for the 293T-ACE2 cell line and the pHIV-1NL4-3ΔEnv-NanoLuc  
658 construct. The following reagents were obtained from the NIH AIDS Reagent Program, Division  
659 of AIDS, NIAID, NIH: TZM-bl cells, from John C. Kappes, Xiaoyun Wu, and Tranzyme, Inc.  
660 and HIV-1 pNL4-3 ΔEnv Vpr Luciferase Reporter Vector (pNL4-3.Luc.R-E-) obtained from  
661 Nathaniel Landau. We are thankful to Dominic Filion for developing the algorithm for image-  
662 assisted plaque quantification. JJ is supported by the CIHR Postdoctoral Fellowship (HIV-  
663 435243-73284). We also thank Dr Annik Prat (IRCM) for the design of the summary model  
664 shown in Fig. 7. Finally, we would like to thank Mrs. Brigitte Mary for her excellent editorial  
665 help and organization of the manuscript.

## 666 **Data availability**

---

667 Source data are provided with this paper. The data that support the findings of this study are  
668 preserved at repositories of the Montreal Clinical Research Institute (IRCM), Montreal, QC,  
669 Canada and available from the corresponding authors upon reasonable request.

670

## 671 **Author contributions**

---

672 RE made all the original critical experiments of the implication of the PCs in Spike processing  
673 and the effect of their inhibitors. JJ performed all the cell assays with infectious SARS-CoV-2.  
674 DSR participated in the biochemical characterizations of TMPRSS2 processing of ACE2 and S1.  
675 UA performed all cell-cell fusion assays. AE made all the mutants used in the work. RMD  
676 generated the HeLa-ACE2 cells and prepared all the cells for *ex vivo* analyses. DNH performed  
677 all the immunocytochemical experiments. DF performed the proteomics mass spectral analysis  
678 of S2 and S2'. FD and ML performed the experiments related to SARS-CoV-2 pseudovirions.  
679 AD and PSO performed all the furin and TMPRSS2 *in vitro* kinetic cleavage analyses of  
680 peptides mimicking the S1/S2 and S2' sites. CM and KW provided the BOS-inhibitors and their  
681 characterization. ED made seminal contributions to the possible role of furin-like enzymes in the  
682 processing of the spike glycoprotein and actively contributed to the conceptualization and  
683 writing of the manuscript. TNQP designed most of the viral experiments and data analyses. EAC  
684 (virology) and NGS (biochemistry and cell biology) conceptualized the research program and  
685 provided the intellectual contributions and funding for the whole project. All authors actively  
686 contributed to the final version of the manuscript.

687

688

689

## References

690

- 691 1. Dobson AP, Carper ER. Infectious Diseases and Human Population History: Throughout  
692 history the establishment of disease has been a side effect of the growth of civilization.  
693 *Bioscience* **46**, 115-126 (1996).
- 694 2. Cui J, Li F, Shi ZL. Origin and evolution of pathogenic coronaviruses. *Nat Rev Microbiol*  
695 **17**, 181-192 (2019).
- 696 3. Almeida JD, Tyrrell DA. The morphology of three previously uncharacterized human  
697 respiratory viruses that grow in organ culture. *J Gen Virol* **1**, 175-178 (1967).
- 698 4. Belouzard S, Millet JK, Licitra BN, Whittaker GR. Mechanisms of coronavirus cell entry  
699 mediated by the viral spike protein. *Viruses* **4**, 1011-1033 (2012).
- 700 5. Liu PP, Blet A, Smyth D, Li H. The Science Underlying COVID-19: Implications for the  
701 Cardiovascular System. *Circulation* **142**, 68-78 (2020).
- 702 6. The species Severe acute respiratory syndrome-related coronavirus: classifying 2019-  
703 nCoV and naming it SARS-CoV-2. *Nat Microbiol* **5**, 536-544 (2020).
- 704 7. Tang T, Bidon M, Jaimes JA, Whittaker GR, Daniel S. Coronavirus membrane fusion  
705 mechanism offers as a potential target for antiviral development. *Antiviral Res*, 104792  
706 (2020).
- 707 8. Lan J, *et al.* Structure of the SARS-CoV-2 spike receptor-binding domain bound to the  
708 ACE2 receptor. *Nature* **581**, 215-220 (2020).
- 709 9. Lu G, Wang Q, Gao GF. Bat-to-human: spike features determining 'host jump' of  
710 coronaviruses SARS-CoV, MERS-CoV, and beyond. *Trends Microbiol* **23**, 468-478  
711 (2015).
- 712 10. Millet JK, Whittaker GR. Physiological and molecular triggers for SARS-CoV membrane  
713 fusion and entry into host cells. *Virology* **517**, 3-8 (2018).
- 714 11. Ou X, *et al.* Characterization of spike glycoprotein of SARS-CoV-2 on virus entry and its  
715 immune cross-reactivity with SARS-CoV. *Nat Commun* **11**, 1620 (2020).
- 716 12. Hoffmann M, Kleine-Weber H, Pöhlmann S. A Multibasic Cleavage Site in the Spike  
717 Protein of SARS-CoV-2 Is Essential for Infection of Human Lung Cells. *Mol Cell* **78**,  
718 779-784.e775 (2020).
- 719 13. Shang J, *et al.* Cell entry mechanisms of SARS-CoV-2. *Proc Natl Acad Sci U S A* **117**,  
720 11727-11734 (2020).
- 721 14. Bestle D, *et al.* TMPRSS2 and furin are both essential for proteolytic activation of SARS-  
722 CoV-2 in human airway cells. *Life Sci Alliance* **3**, (2020).
- 723 15. Seidah NG, Prat A. The biology and therapeutic targeting of the proprotein convertases.  
724 *Nat Rev Drug Discov* **11**, 367-383 (2012).
- 725 16. Van de Ven WJ, Creemers JW, Roebroek AJ. Furin: the prototype mammalian subtilisin-  
726 like proprotein-processing enzyme. Endoproteolytic cleavage at paired basic residues of  
727 proproteins of the eukaryotic secretory pathway. *Enzyme* **45**, 257-270 (1991).
- 728 17. Moulard M, Decroly E. Maturation of HIV envelope glycoprotein precursors by cellular  
729 endoproteases. *Biochim Biophys Acta* **1469**, 121-132 (2000).
- 730 18. Millet JK, Whittaker GR. Host cell proteases: Critical determinants of coronavirus  
731 tropism and pathogenesis. *Virus Res* **202**, 120-134 (2015).



- 732 19. Coutard B, Valle C, de Lamballerie X, Canard B, Seidah NG, Decroly E. The spike  
733 glycoprotein of the new coronavirus 2019-nCoV contains a furin-like cleavage site absent  
734 in CoV of the same clade. *Antiviral Res* **176**, 104742 (2020).
- 735 20. Hoffmann M, *et al.* SARS-CoV-2 Cell Entry Depends on ACE2 and TMPRSS2 and Is  
736 Blocked by a Clinically Proven Protease Inhibitor. *Cell* **181**, 271-280.e278 (2020).
- 737 21. Kawase M, Shirato K, van der Hoek L, Taguchi F, Matsuyama S. Simultaneous treatment  
738 of human bronchial epithelial cells with serine and cysteine protease inhibitors prevents  
739 severe acute respiratory syndrome coronavirus entry. *J Virol* **86**, 6537-6545 (2012).
- 740 22. Nimishakavi S, Raymond WW, Gruenert DC, Caughey GH. Divergent Inhibitor  
741 Susceptibility among Airway Lumen-Accessible Tryptic Proteases. *PLoS One* **10**,  
742 e0141169 (2015).
- 743 23. Cyranoski D. Profile of a killer: the complex biology powering the coronavirus  
744 pandemic. *Nature* **581**, 22-26 (2020).
- 745 24. Susan-Resiga D, *et al.* Furin Is the Major Processing Enzyme of the Cardiac-specific  
746 Growth Factor Bone Morphogenetic Protein 10. *J Biol Chem* **286**, 22785-22794 (2011).
- 747 25. Andersen KG, Rambaut A, Lipkin WI, Holmes EC, Garry RF. The proximal origin of  
748 SARS-CoV-2. *Nat Med* **26**, 450-452 (2020).
- 749 26. Örd M, Faustova I, Loog M. Biochemical evidence of furin specificity and potential for  
750 phospho-regulation at Spike protein S1/S2 cleavage site in SARS-CoV2 but not in  
751 SARS-CoV1 or MERS-CoV. *bioRxiv*, 2020.2006.2023.166900 (2020).
- 752 27. Thomas G. Furin at the cutting edge: from protein traffic to embryogenesis and disease.  
753 *Nature Reviews Molecular Cell Biology* **3**, 753-766 (2002).
- 754 28. Benton DJ, *et al.* Receptor binding and priming of the spike protein of SARS-CoV-2 for  
755 membrane fusion. *Nature* **588**, 327-330 (2020).
- 756 29. Heurich A, Hofmann-Winkler H, Gierer S, Liepold T, Jahn O, Pöhlmann S. TMPRSS2  
757 and ADAM17 cleave ACE2 differentially and only proteolysis by TMPRSS2 augments  
758 entry driven by the severe acute respiratory syndrome coronavirus spike protein. *J Virol*  
759 **88**, 1293-1307 (2014).
- 760 30. Platt EJ, Wehrly K, Kuhmann SE, Chesebro B, Kabat D. Effects of CCR5 and CD4 cell  
761 surface concentrations on infections by macrophagetropic isolates of human  
762 immunodeficiency virus type 1. *J Virol* **72**, 2855-2864 (1998).
- 763 31. Sigrist CJ, Bridge A, Le Mercier P. A potential role for integrins in host cell entry by  
764 SARS-CoV-2. *Antiviral Res* **177**, 104759 (2020).
- 765 32. Daly JL, *et al.* Neuropilin-1 is a host factor for SARS-CoV-2 infection. *Science* **370**, 861-  
766 865 (2020).
- 767 33. Walls AC, Park YJ, Tortorici MA, Wall A, McGuire AT, Veerler D. Structure, Function,  
768 and Antigenicity of the SARS-CoV-2 Spike Glycoprotein. *Cell* **181**, 281-292.e286  
769 (2020).
- 770 34. Hoffmann M, *et al.* Chloroquine does not inhibit infection of human lung cells with  
771 SARS-CoV-2. *Nature* **585**, 588-590 (2020).
- 772 35. Vincent MJ, *et al.* Chloroquine is a potent inhibitor of SARS coronavirus infection and  
773 spread. *Virol J* **2**, 69 (2005).
- 774 36. Bayati A, Kumar R, Francis V, McPherson P. SARS-CoV-2 infects cells following viral  
775 entry via clathrin-mediated endocytosis. *bioRxiv* (2020).
- 776 37. Cheng YW, *et al.* Furin Inhibitors Block SARS-CoV-2 Spike Protein Cleavage to  
777 Suppress Virus Production and Cytopathic Effects. *Cell Rep* **33**, 108254 (2020).



- 778 38. Cai Y, *et al.* Distinct conformational states of SARS-CoV-2 spike protein. *Science* **369**,  
779 1586-1592 (2020).
- 780 39. Malik YA. Properties of Coronavirus and SARS-CoV-2. *Malays J Pathol* **42**, 3-11  
781 (2020).
- 782 40. Wölfel R, *et al.* Virological assessment of hospitalized patients with COVID-2019.  
783 *Nature* **581**, 465-469 (2020).
- 784 41. Zhou L, *et al.* The SARS-CoV-2 targets by the pscRNA profiling of ACE2, TMPRSS2  
785 and Furin proteases. *iScience*, 101744 (2020).
- 786 42. Mokhtari T, Hassani F, Ghaffari N, Ebrahimi B, Yarahmadi A, Hassanzadeh G. COVID-  
787 19 and multiorgan failure: A narrative review on potential mechanisms. *J Mol Histol* **51**,  
788 613-628 (2020).
- 789 43. Chu H, *et al.* Comparative tropism, replication kinetics, and cell damage profiling of  
790 SARS-CoV-2 and SARS-CoV with implications for clinical manifestations,  
791 transmissibility, and laboratory studies of COVID-19: an observational study. *Lancet*  
792 *Microbe* **1**, e14-e23 (2020).
- 793 44. Self WH, *et al.* Effect of Hydroxychloroquine on Clinical Status at 14 Days in  
794 Hospitalized Patients With COVID-19: A Randomized Clinical Trial. *JAMA* **324**, 2165-  
795 2176 (2020).
- 796 45. Rosenke K, *et al.* Hydroxychloroquine prophylaxis and treatment is ineffective in  
797 macaque and hamster SARS-CoV-2 disease models. *JCI Insight* **5**, (2020).
- 798 46. Peacock TP, *et al.* The furin cleavage site of SARS-CoV-2 spike protein is a key  
799 determinant for transmission due to enhanced replication in airway cells. *bioRxiv*,  
800 2020.2009.2030.318311 (2020).
- 801 47. Monteil V, *et al.* Human soluble ACE2 improves the effect of remdesivir in SARS-CoV-  
802 2 infection. *EMBO Mol Med*, e13426 (2020).
- 803 48. Morens DM, Fauci AS. Emerging Pandemic Diseases: How We Got to COVID-19. *Cell*  
804 **183**, 837 (2020).
- 805 49. Lodge R, Lalonde JP, Lemay G, Cohen EA. The membrane-proximal intracytoplasmic  
806 tyrosine residue of HIV-1 envelope glycoprotein is critical for basolateral targeting of  
807 viral budding in MDCK cells. *EMBO J* **16**, 695-705 (1997).
- 808 50. Forget J, Yao XJ, Mercier J, Cohen EA. Human immunodeficiency virus type 1 vpr  
809 protein transactivation function: mechanism and identification of domains involved. *J*  
810 *Mol Biol* **284**, 915-923 (1998).
- 811 51. Schmidt F, *et al.* Measuring SARS-CoV-2 neutralizing antibody activity using  
812 pseudotyped and chimeric viruses. *J Exp Med* **217**, (2020).

813

814

## 815 **Figure legends**

---

816 **Figure 1: Processing of S-peptides and S-protein.** (A) Schematic representation of the primary  
817 structure of preproS and its domains and the predicted furin-like S1/S2 site generating the S1-  
818 and S2-subunits, as well as the S2' site preceding the fusion peptide (FP). The signal peptide  
819 (SP), N-terminal domain (NTD), receptor binding domain (RBD) to ACE2, the two heptad  
820 repeats HR1 and HR2, the transmembrane domain (TM), the cytosolic tail (CT) and the C-  
821 terminal V5-tag are indicated. (B-D) *In vitro* furin and TMPRSS2 cleavage activity against the  
822 synthetic peptides described in Table 1. Each substrate was tested at a final protease  
823 concentration of 2 and 100 nM (furin, enlarged box) and 50 nM (TMPRSS2) at pH 6 and 7.5  
824 respectively. (B) *In vitro* furin activity against the peptides mimicking the S1/S2 and S2'  
825 cleavage site sequence of the spike protein from SARS-CoV-1, SARS-CoV-2 and MERS-CoV.  
826 (C) *In vitro* furin activity against WT and mutated peptides carrying substitutions in the furin-  
827 like cleavage site mimicking the S1/S2 SARS-CoV-2 cleavage site. (D) TMPRSS2 does not  
828 cleave at either S1/S2 or S2'. (E) Western blot analyses of the processing of WT proS into V5-  
829 tagged S2 and S2' by the proprotein convertases furin, PC5A, PACE4 and PC7 following co-  
830 transfection of their cDNAs in HeLa cells. The migration positions of immature proS<sub>im</sub>, S2 and  
831 S2', as well as the actin loading control are emphasized. V = empty pIRES-EGFP-V5 vector.  
832 (F) Western blot analyses of HeLa cells following co-transfection with cDNAs coding for either  
833 WT S-protein or its double Ala-mutant [R685A + R682A] ( $\mu$ S1/S2) in the absence or presence of  
834 cDNAs coding for furin or TMPRSS2 at an S:protease ratio of 1:2. \*Inconsistently observed  
835 oligomeric forms of proS. (E, F) The estimated % cleavages into S1/S2 and S2' are shown,  
836 based on the ratio of the V5-immunoreactivity of the cleaved form to the sum of all forms. The  
837 data are representative of at least three independent experiments.

838 **Figure 2: Comparative processing of proS and its S1/S2 mutants by endogenous proteases**  
839 **in HeLa cells and upon co-expression of furin or TMPRSS2.** (A) HeLa cells were transiently  
840 co-transfected with cDNAs coding for an empty vector (V), vectors encoding furin, TMPRSS2  
841 and WT spike glycoprotein or its PC-cleavage sites mutants at positions P4 (R682A), P1  
842 (R685A) and P1' (S686A). At 24h post-transfection cell lysates were subjected to Western  
843 blotting using a V5-mAb. \*Inconsistently observed oligomeric forms of proS. (B) Western blot  
844 showing the impact of ACE2 on the processing of spike glycoprotein by furin and TMPRSS2. The  
845 ratio of cDNAs used was S:ACE2:TMPRSS2 = 1:1:2. The percent processing shown under each  
846 lane was calculated from the ratio of the V5-immunoreactivity of each protein relative to the total  
847 V5-immunoreactivity. The data are representative of at least three independent experiments.

848 **Figure 3: Inhibition of PCs by BOS compounds.** (A) Chemical motif of BOS-inhibitors. (B)  
849 Representative structure of BOS-318. (C) *In vitro* BOS-inhibition of the cleavage of the  
850 fluorogenic dibasic substrate FAM-QRVRRAVGIDK-TAMRA by each of the proprotein  
851 convertases furin, PC5A (PCSK5), PACE4 (PCSK6) and PC7 (PCSK7). All experiments were  
852 performed in 10 different wells and the average pIC<sub>50</sub> (in nM) was calculated. For comparison  
853 we present the inhibitory pIC<sub>50</sub> of the furin-like inhibitor RVKR-cmk performed >100 times.

854 Golgi assay: Last column represents the effects of BOS-inhibitors on U2OS cells expressing  
855 each of furin, PC5A, PACE4 and PC7 simultaneously transduced with a BacMam-delivered  
856 construct containing a Golgi-targeting sequence followed by a 12-amino acid furin/PCSK  
857 cleavage site from Bone Morphogenic Protein 10 (BMP10) and then GFP at the C terminus  
858 (GalNAc-T2-GGGGS-DSTARIRR↓NAKG-GGGGS-GFP). Dibasic cleavage releases NAKG-  
859 GGGGS-GFP thereby reducing the Golgi-associated fluorescence estimated by imaging. (D) *In*  
860 *vitro* inhibition of Furin by the BOS compounds. Furin (2 nM) was incubated with increasing  
861 concentration of BOS-inhibitors, and its enzymatic activity against the synthetic peptides

862 DABSYL/Glu-TNSPRRAR↓SVAS-EDANS (5  $\mu$ M) was determined at pH 7.5 (n=3). **(E)** Furin-  
863 inhibitors (BOS) abrogate endogenous processing of the spike glycoprotein. HeLa cells were  
864 transiently transfected with a cDNA encoding an empty vector (V) or with one expressing the V5-  
865 tagged spike (S) glycoprotein (Spike-V5). At 5h pre-transfection, cells were treated with vehicle  
866 DMSO (NT, duplicate) or with the furin-inhibitors at indicated concentrations, or RVKR-cmk at  
867 50  $\mu$ M. At 24h post-transfection media were replaced with fresh ones lacking (NT) or containing  
868 the inhibitors for an additional 24h. Cell extracts were analyzed by Western blotting using a mAb-  
869 V5. All data are representative of at least three independent experiments.

870 **Figure 4: Spike-induced cell-to-cell fusion relies on furin cleavage at S1/S2.** **(A)** Cell-to-cell  
871 fusion between donor cells (HeLa) expressing the fusogenic SARS-CoV-2 Spike protein along  
872 with the HIV trans-activator Tat, and acceptor cells (TZM-bl) that express ACE2. Upon fusion,  
873 Tat is transferred from donor to acceptor cells, thereby inducing luciferase expression. **(B)**  
874 Donor cells were transfected with vectors expressing either no protein (empty vector, EV),  
875  $\mu$ S1/S2, or WT Spike (S) in the absence (S) or presence of vehicle (S-DMSO) and the furin-  
876 inhibitors RVKR (10  $\mu$ M), BOS-318, BOS-981, BOS-857 (300 nM). Acceptor cells were  
877 transfected with a vector expressing ACE2. After 48h, donor and acceptor cells were co-cultured  
878 for 18h. Relative luminescence units (RLU) were normalized to the EV value arbitrarily set to 1.  
879 Data are presented as mean values  $\pm$  SD (n=3), One-Way ANOVA, Dunn-Sidak multiple  
880 comparison test. **(C)** Donor HeLa cells were co-transfected with vectors (1:1 ratio) expressing  
881 WT Spike,  $\mu$ S1/S2 with EV or TMPRSS2. Acceptor TZM-bl cells were transfected with ACE2.  
882 After 48h, HeLa and TZM-bl were co-cultured for 18h and luciferase activity measured. The  
883 fusion is represented as ratio between the RLU measured for each condition and the RLU  
884 measured in the co-culture between donor cells transfected with EV and ACE2 acceptor cells.

885 Data are presented as mean values  $\pm$  SD (n=3), One-Way ANOVA, Bonferroni multiple  
886 comparison test. **(D)** Donor HeLa cells expressing WT S or  $\mu$ S1/S2 were co-cultured with  
887 acceptor TZM-bl cells expressing (ratio of 1:1): EV + EV, ACE2 + EV, ACE2 + TMPRSS2 or  
888 TMPRSS2 + EV. The extent of fusion is represented as a ratio between the RLU measured for  
889 each condition and that of donor cells expressing EV. The bar graph represents the average of 3  
890 experiments performed in triplicates. Data are presented as mean values  $\pm$  SEM (n=3), Two-Way  
891 ANOVA.

892 **Figure 5: Processing of SARS-CoV-2 S by furin-like convertases is essential for viral entry**  
893 **in human lung epithelial cells but not in model HEK 293 cells stably expressing ACE2.** **(A)**  
894 Furin cleavage of proS at the S1/S2 site is required for SARS-CoV-2 pseudoviral entry in Calu-3  
895 but not 293T-ACE2. Cells were inoculated with luciferase-expressing HIV particles pseudotyped  
896 with SARS-CoV-2 wild-type Spike (WT S) or mutated S ( $\mu$ S1/S2). Each dot represents a  
897 different experiment with median luciferase activity calculated from three biological replicates.  
898 Three or four experiments were performed for each cell type. Error bars indicate standard  
899 deviation (SD) **(B)** Inhibiting proS processing at S1/S2 by a novel furin-like inhibitor (BOS-318)  
900 during pseudovirion packaging prevents viral entry in Calu-3 but not in 293T-ACE2 Each dot  
901 color depicts a different experiment and shown is mean  $\pm$  SD of two to three experiments (three  
902 biological replicates per experiment). **(C)** Western blot analysis show BOS-318 inhibits  
903 processing of proS at the S1/S2 site. Purified pseudovirions and cellular extracts of producing  
904 293T17 cells treated or not with BOS-318 inhibitor were separated on SDS-PAGE gel and  
905 analyzed for HIV-1 p24 and V5-tagged S-protein (proSm or cleaved, S2) as indicated.

906 **Figure 6: Furin-like inhibitors and Camostat Treatment decrease SARS-CoV-2 infection in**  
907 **Calu-3 Cells.** **(A)** Replication kinetics was studied at 12, 24 and 48h post-infection by plaque

908 assay to determine PFUs of SARS-CoV-2 virus in the supernatant of infected Calu-3 cells treated  
909 or not with 1 $\mu$ M BOS-318, BOS-857 and BOS-981. A line graph represents results of the  
910 triplicate plaque assay results (mean  $\pm$  SD). **(B)** The virus titers (PFU per milliliter) released in  
911 the supernatant (24h post-infection) of infected Calu-3 cells treated with indicated concentrations  
912 of BOS-318 were determined by plaque assay (mean  $\pm$  SD of triplicates, \*,  $p < 0.05$ ; \*\*,  $p <$   
913  $0.01$ ; \*\*\*,  $p < 0.001$ ) (left panel). The selectivity index (SI) of BOS-318 in Calu-3 cells as shown  
914 in top right panel was determined by  $CC_{50}/IC_{50}$ . The left y axis indicates the inhibition of virus  
915 titer (percent) relative to that of the untreated control group (red). The right y axis indicates the  
916 cell viability (percent) relative to that of the untreated control group (green). The  $CC_{50}$  (50%  
917 cytotoxic concentration),  $IC_{50}$  (half maximal inhibitory concentration), and SI (selectivity index)  
918 values for each inhibitor are as shown. Representative plaque images of infected Calu-3 cells  
919 treated with indicated doses of BOS-inhibitors are shown in the bottom right panel. **(C)**  
920 Immunoblots for the infected Calu-3 cells (right panel) and viral particles secreted in the  
921 supernatant (left panel) with and without treatment with BOS-inhibitors indicate reduced viral  
922 protein levels. Immunoblots were probed for the full-length (proSm) and cleaved (S2) fragments  
923 of viral S protein and nucleocapsid (N) protein as indicated;  $\beta$ -Actin was included as the loading  
924 control for the cells. **(D)** The virus titers (PFU per milliliter) released in the supernatant (24h  
925 post-infection) of infected Calu-3 cells treated with BOS-981 and/or Camostat (Camo) were  
926 determined by plaque assay (mean  $\pm$  SD of duplicates, \*,  $p < 0.05$ ; \*\*,  $p < 0.01$ ; \*\*\*,  $p < 0.001$ )  
927 (top panel). Representative plaque images of infected Calu-3 cells are shown in the bottom panel.

928 **Figure 7: Proposed model for the processing of S-protein and its blockade by furin and**  
929 **TMPRSS2 inhibitors.** Boxed left panel: schematic representation of the S-glycoprotein domains  
930 of SARS-CoV-2, including the N-terminal (NTD) and C-terminal (CTD) domains of S1, the

931 furin-S1/S2 and S2' and the TMPRSS2 S1' processing sites and the fusogenic  $\alpha$ -helix that  
932 follows S2'. Binding of the RBD domain of S1 to the membrane associated ACE2 in target cells,  
933 and the cell surface expression of TMPRSS2 and furin are also schematized. Right panels: (1)  
934 Viral infection is favored by the presence of a furin-like sites at S1/S2 and S2'. TMPRSS2 in  
935 acceptor cells enhances infection by shedding ACE2 into soluble sACE2 (in bold) and is further  
936 enhanced by cleavage of S1 into S1' which forms a secreted complex with sACE2. Optimal  
937 blockade of viral infection is achieved by a combination of furin and TMPRSS2 inhibitors. (2) In  
938 absence of a furin-like site at S1/S2 ( $\mu$ S1/S2), high levels of TMPRSS2 in acceptor cells can  
939 favor infection by cleaving S1 into S1' and shedding ACE2 into soluble sACE2 complexed with  
940 S1'.

941



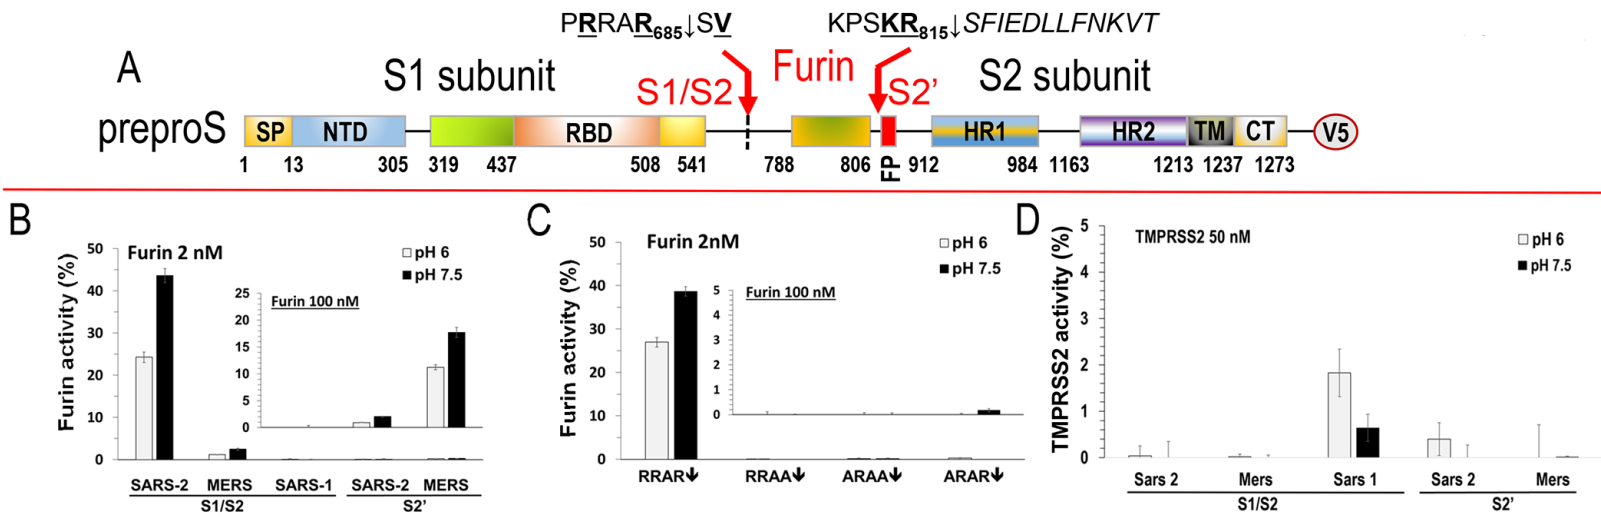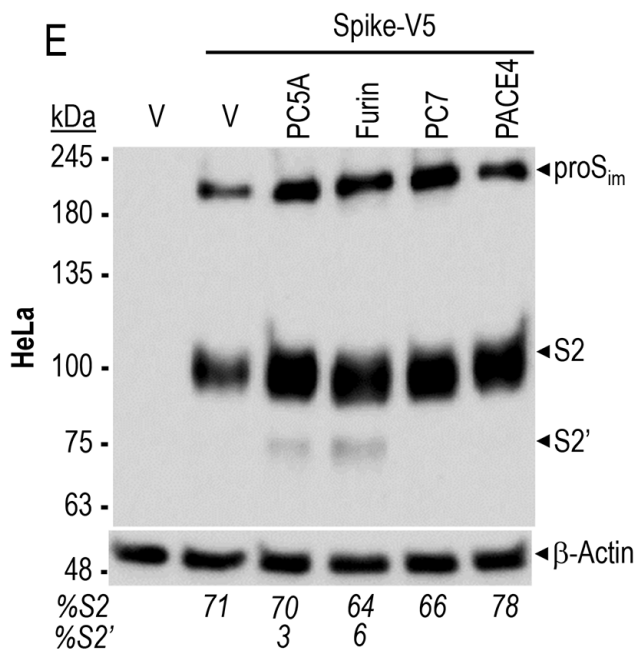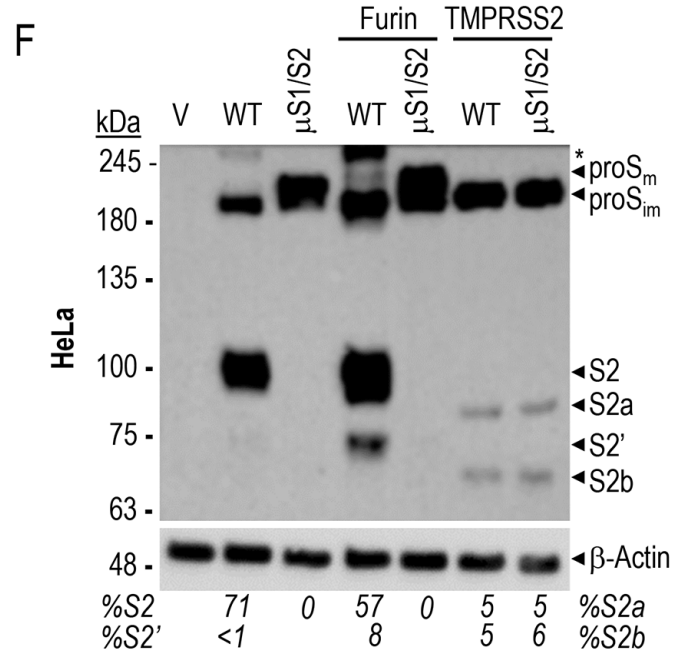



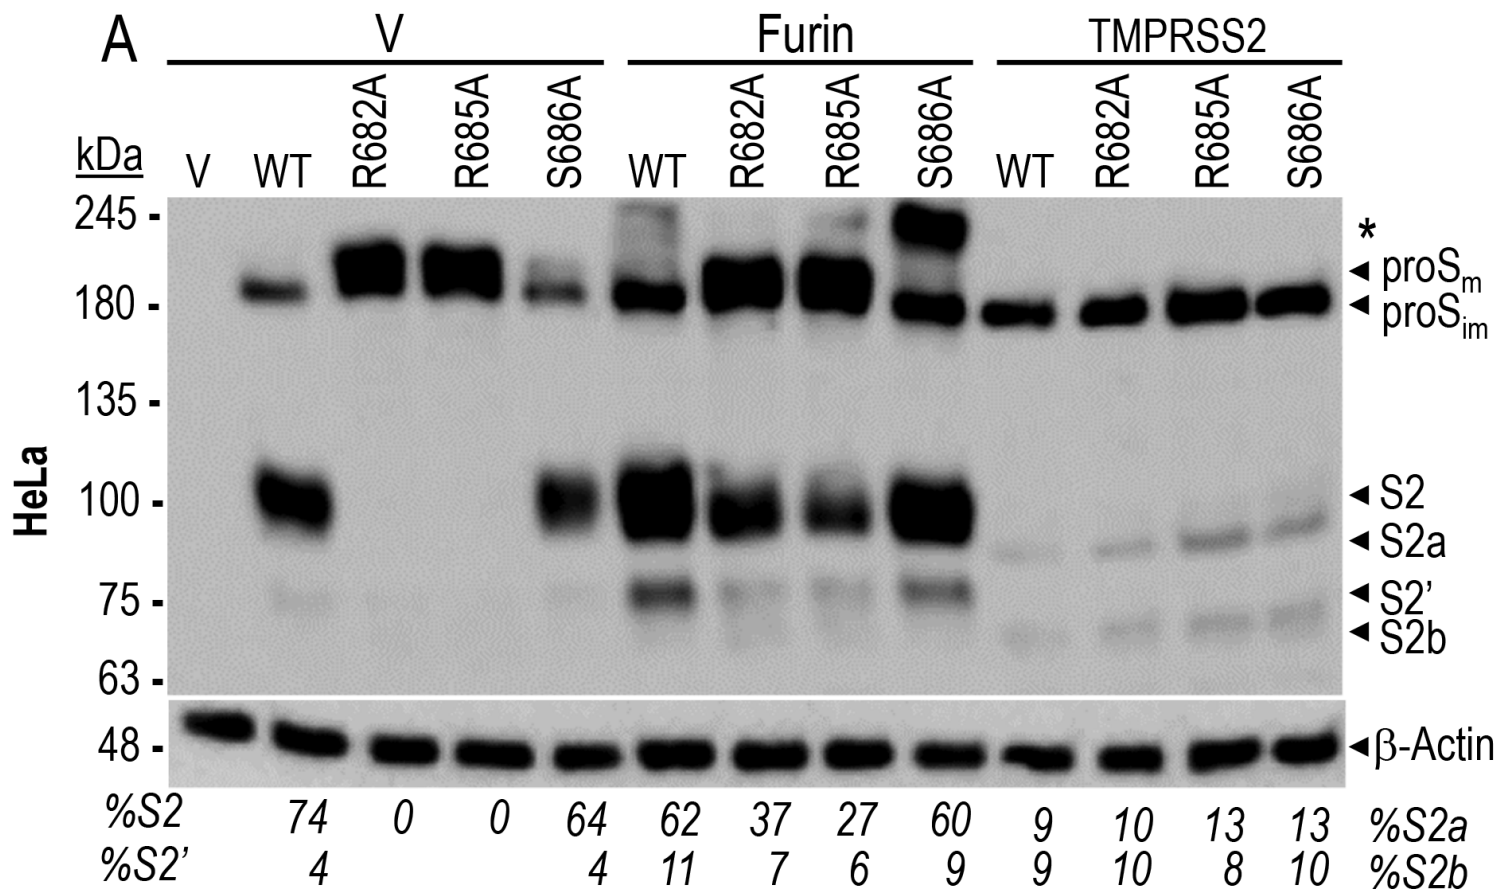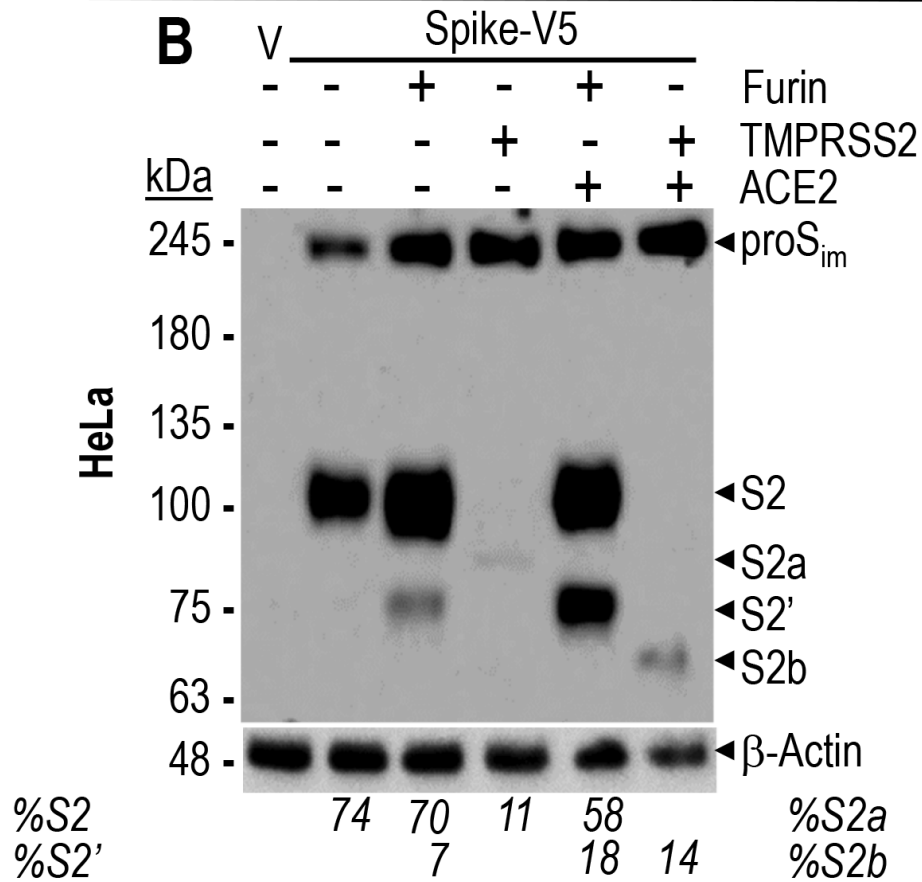

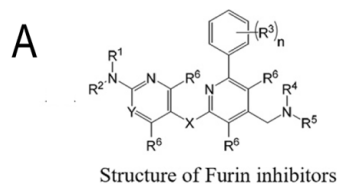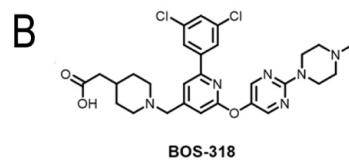

**C**

|                                                  | Furin pIC50             | PCSK5 pIC50             | PCSK6 pIC50             | PCSK7 pIC50             | Golgi pIC50 (U2OS)     |
|--------------------------------------------------|-------------------------|-------------------------|-------------------------|-------------------------|------------------------|
| <b>BOS-318</b>                                   | 8.8 ± 0.4<br>(n = 10)   | 7.6 ± 0.09<br>(n = 8)   | 6.7 ± 0.15<br>(n = 6)   | 7.4 ± 0.22<br>(n = 8)   | 7.7 ± 0.24<br>(n = 22) |
| <b>BOS-981</b>                                   | 9.3 ± 0.5<br>(n = 10)   | 7.5 ± 0.22<br>(n = 10)  | 6.9 ± 0.1<br>(n = 4)    | 6.9 ± 0.2<br>(n = 8)    | 8.3 ± 0.25<br>(n = 12) |
| <b>BOS-857</b>                                   | 9.4 ± 0.3<br>(n = 10)   | 7.6 ± 0.1<br>(n = 10)   | 6.7 ± 0.24<br>(n = 5)   | 6.9 ± 0.3<br>(n = 8)    | 7.6 ± 0.2<br>(n = 12)  |
| <b>Decanoyl-RVKR-CMK<br/>"Furin Inhibitor I"</b> | 9.1 ± 0.43<br>(n = 447) | 9.9 ± 0.38<br>(n = 162) | 9.2 ± 0.24<br>(n = 214) | 9.6 ± 0.63<br>(n = 198) | 5.1 ± 0.33<br>(n = 8)  |

**D**

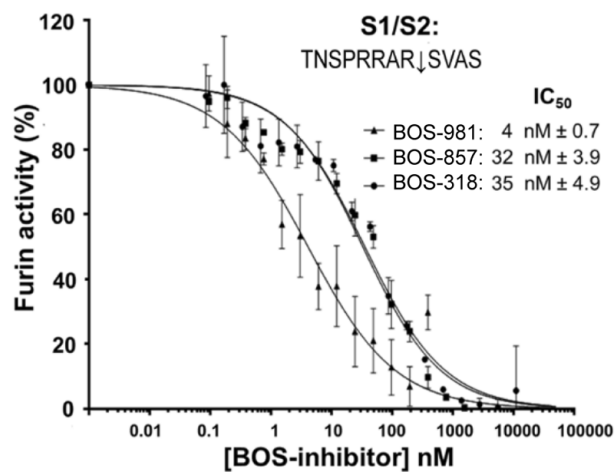

**E**

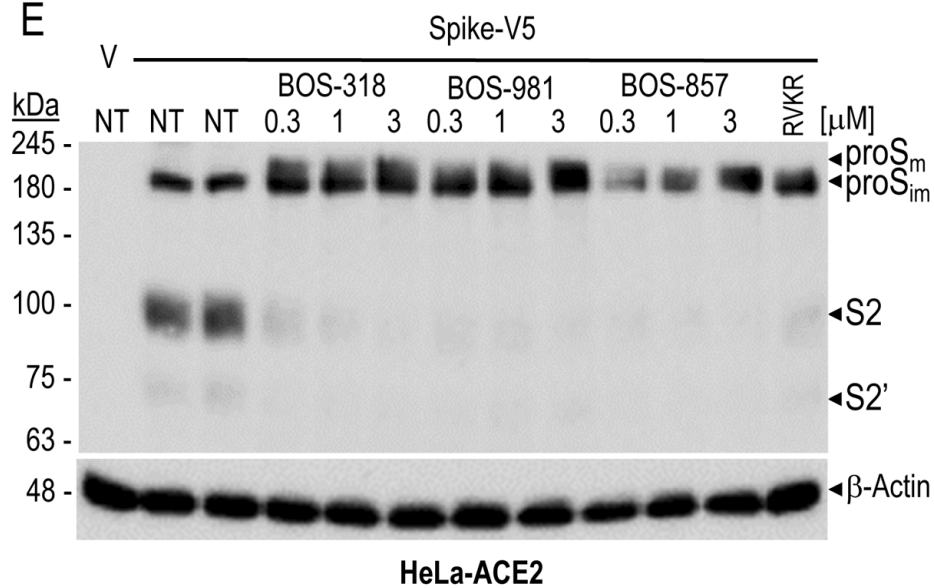

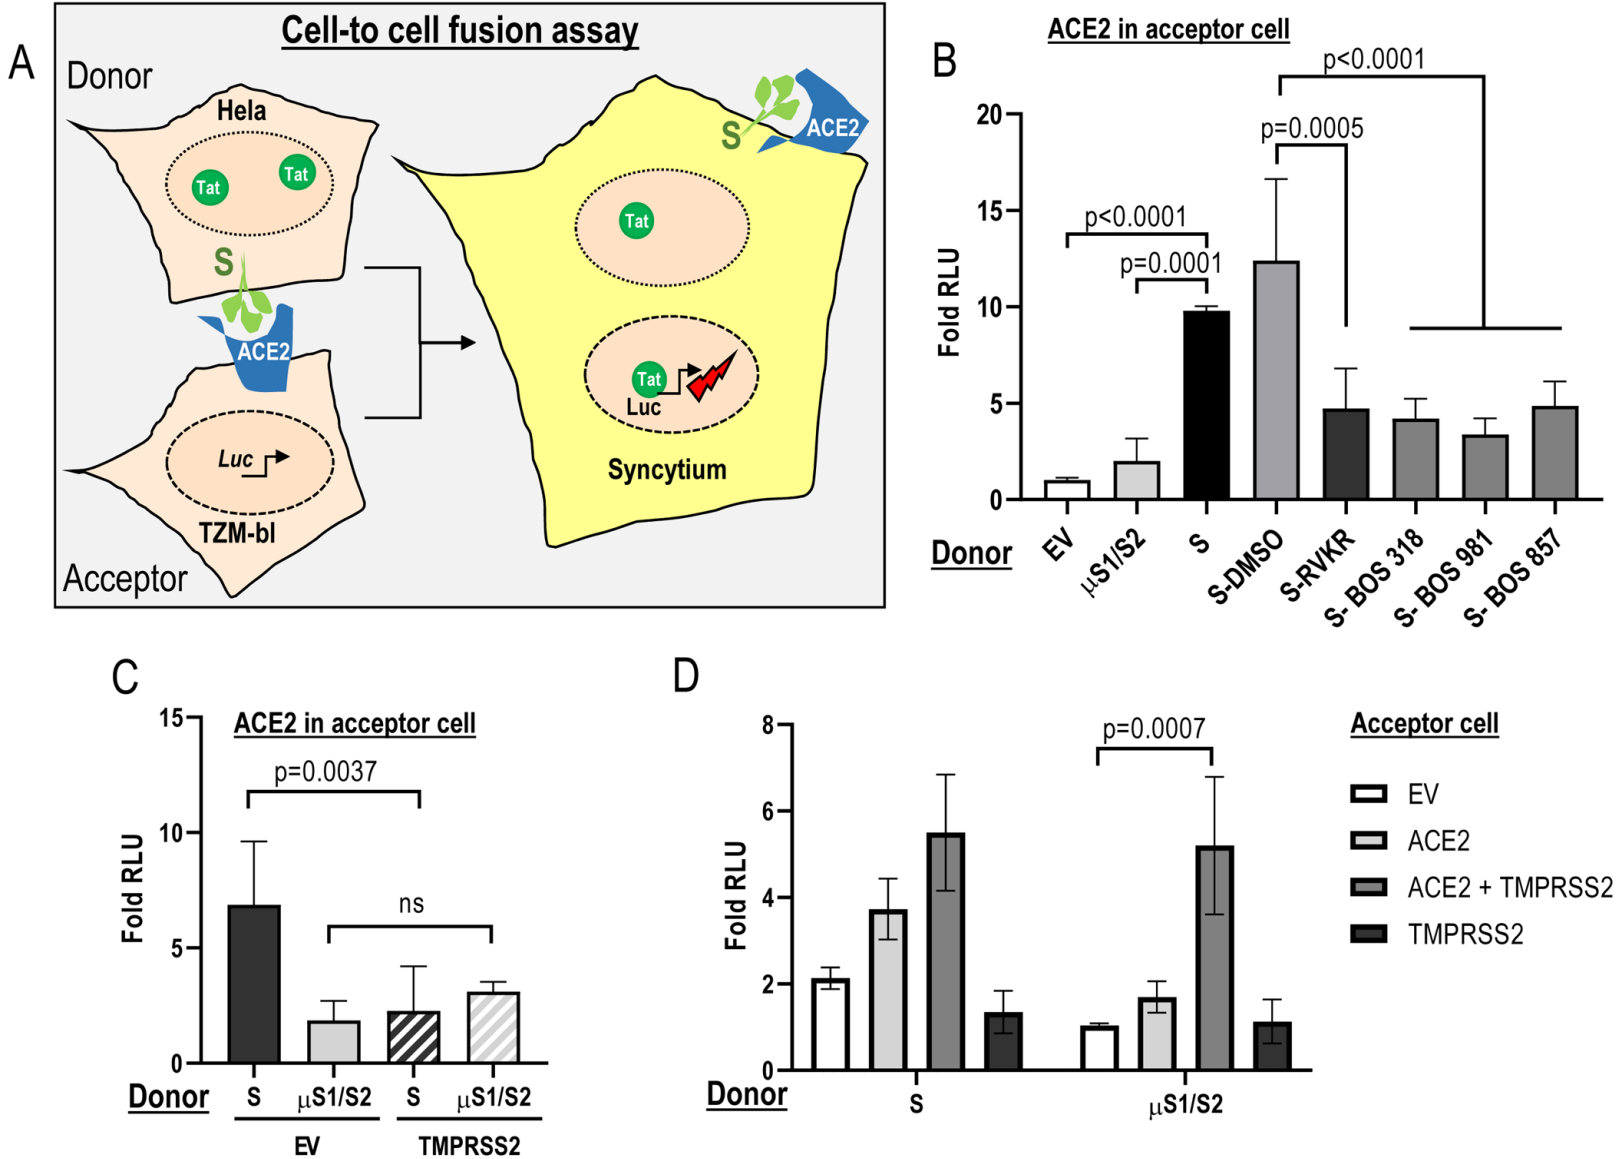

**A**

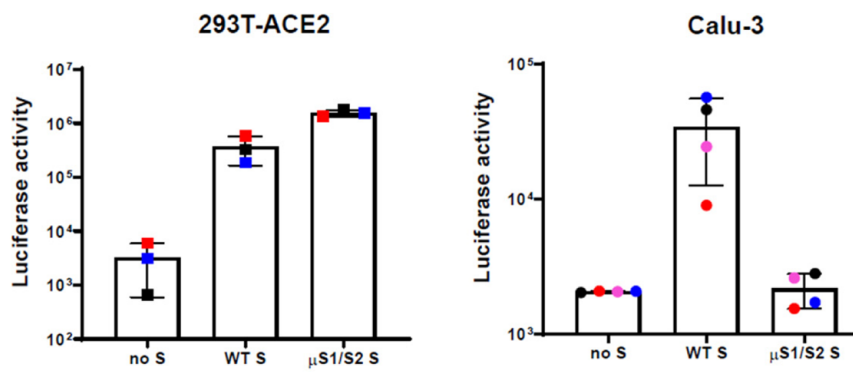

**B**

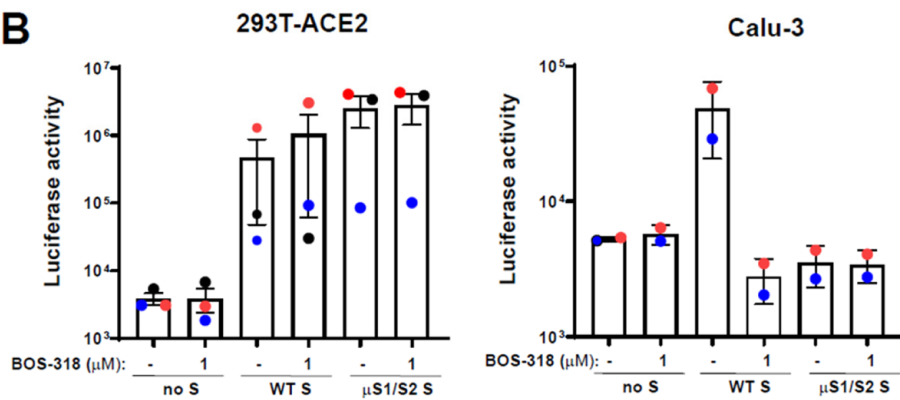

**C**

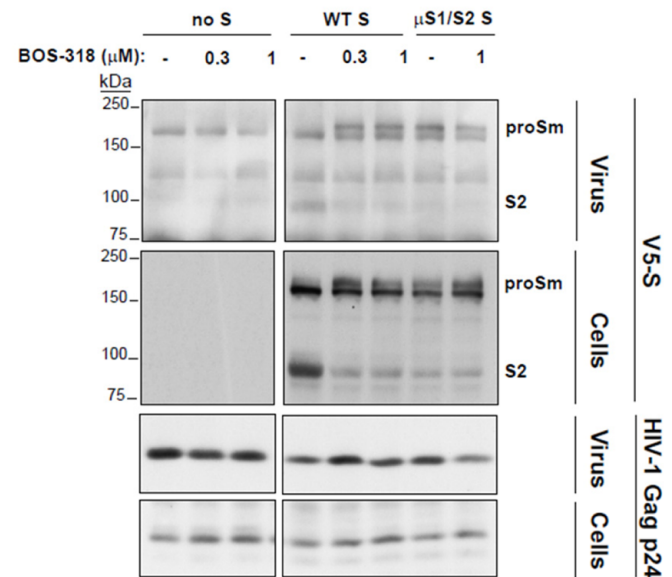

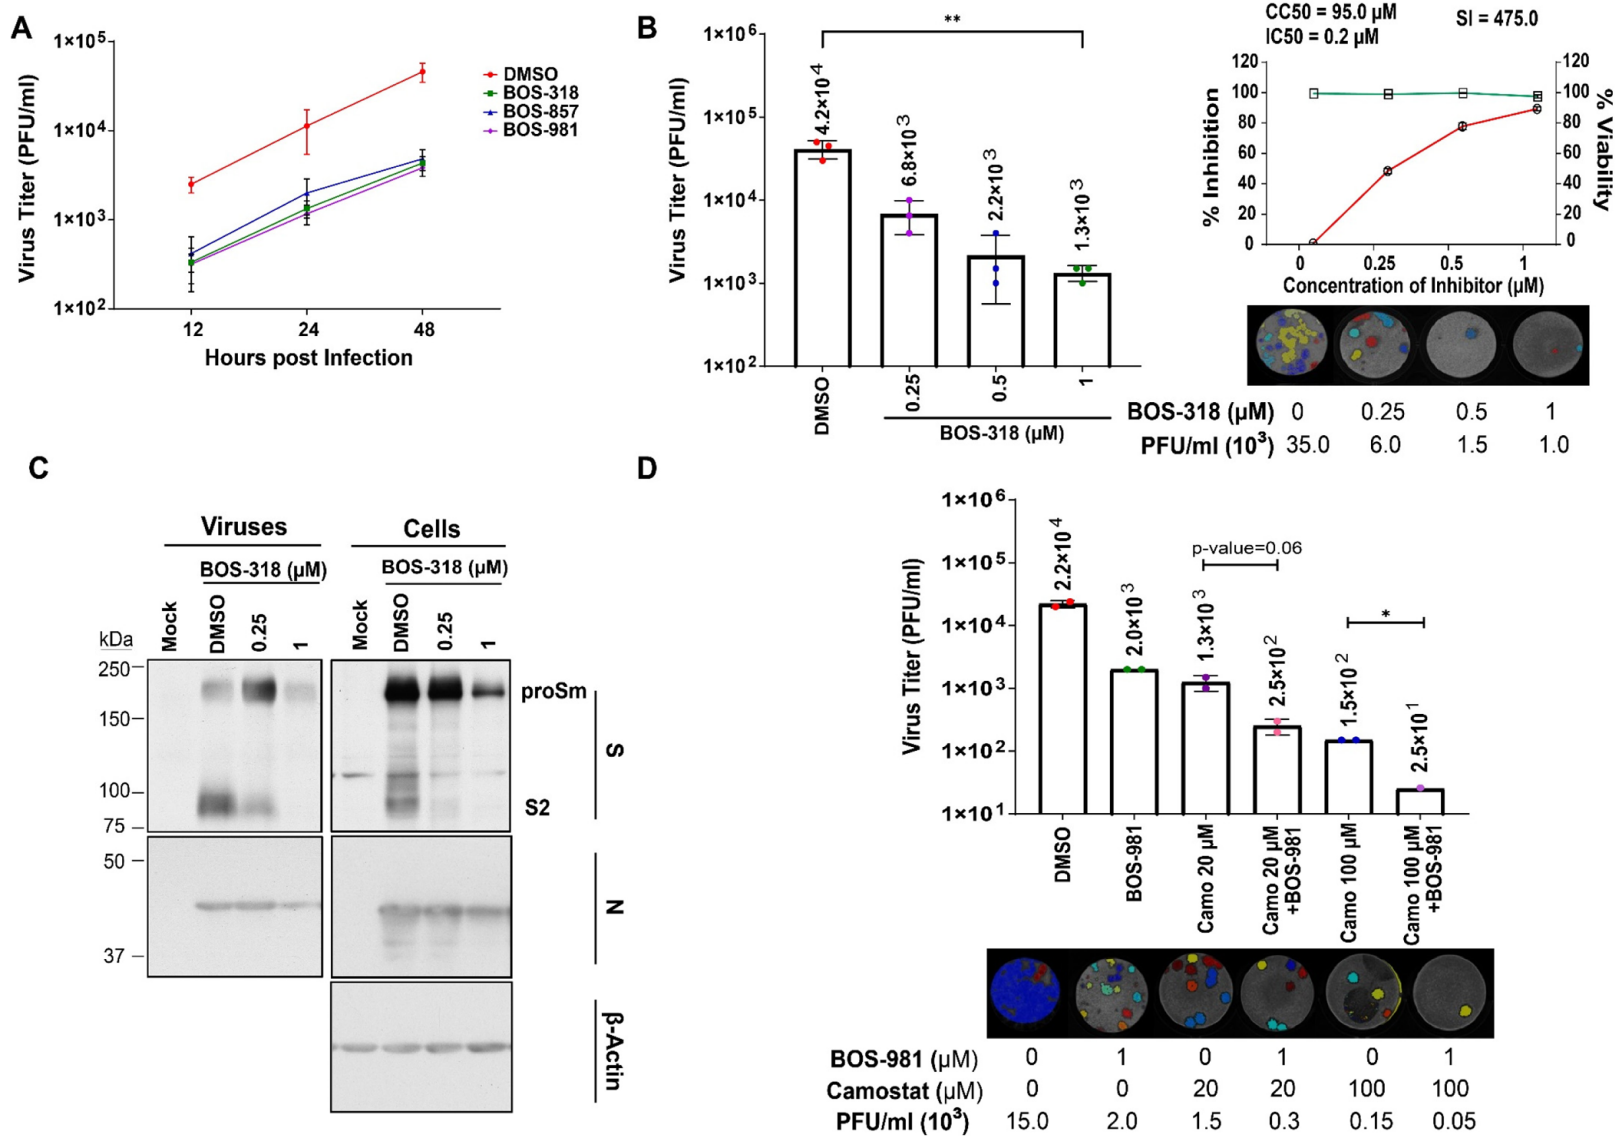

# Role of furin & TMPRSS2 in SARS-CoV-2 infections and tropism

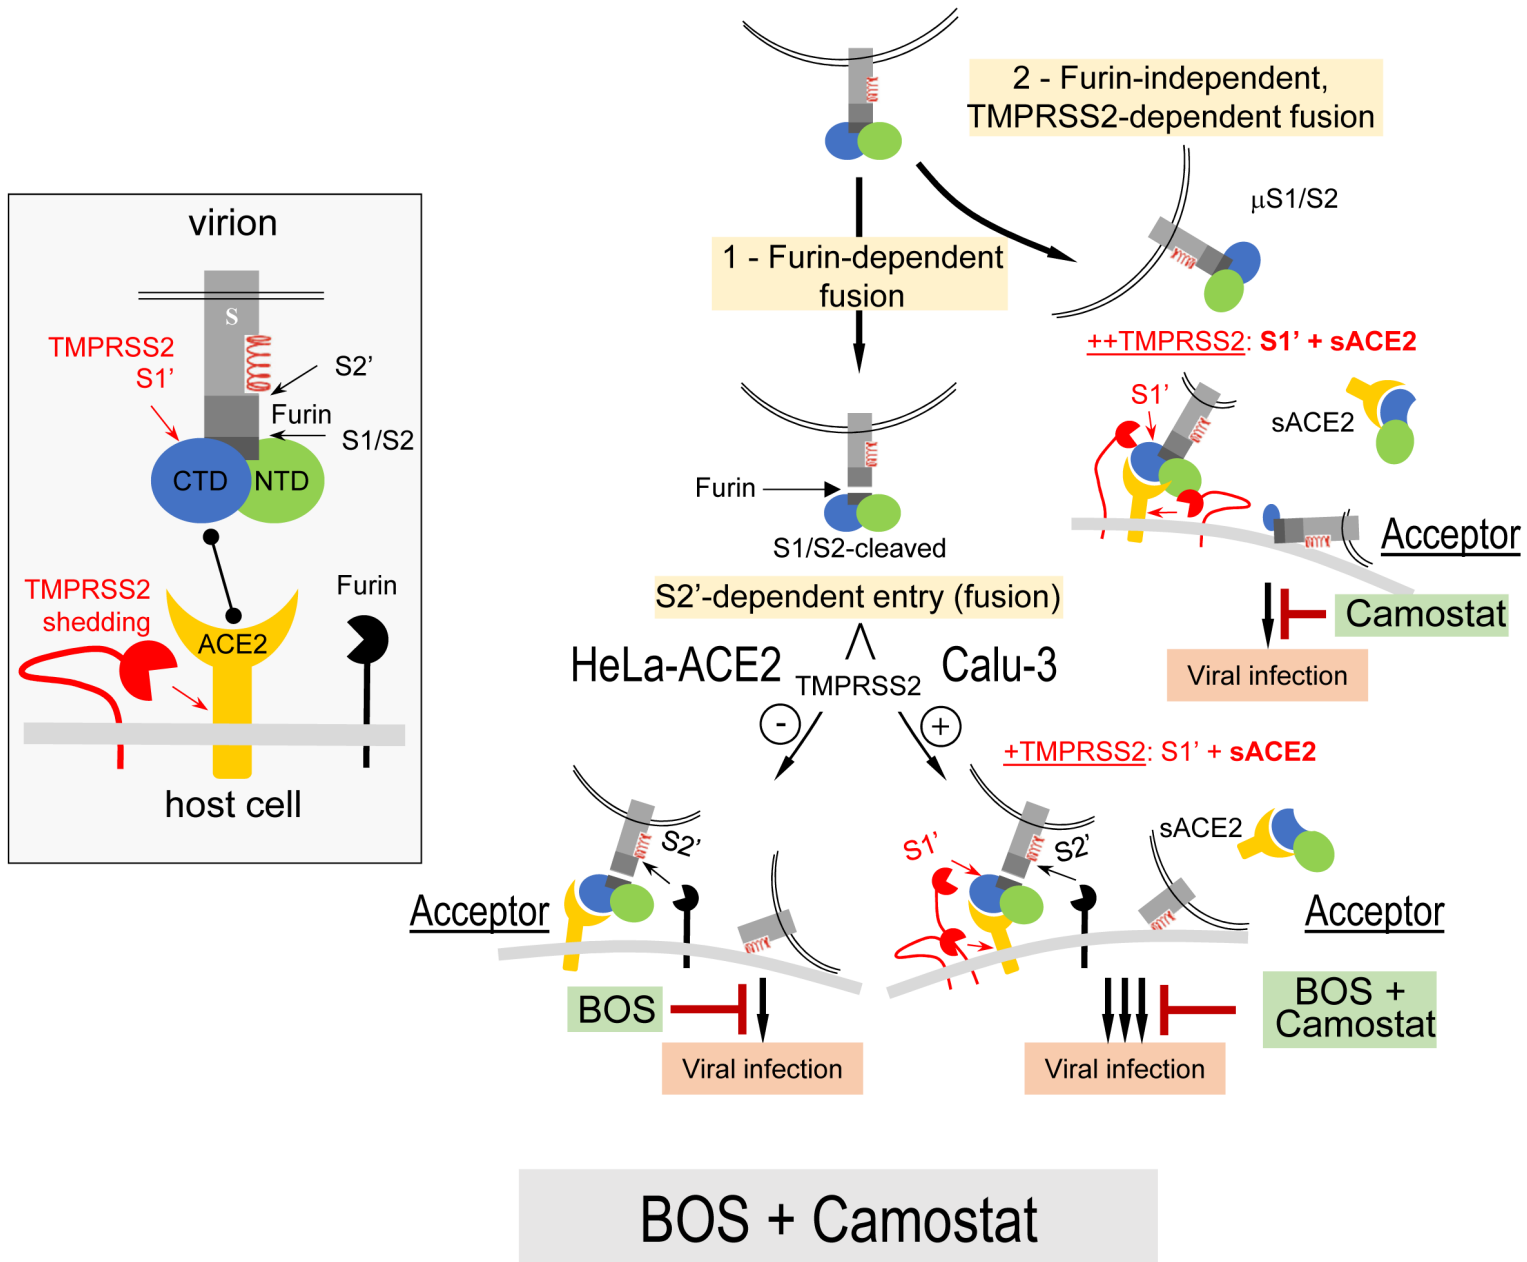

Source: https://www.biorxiv.org/content/10.1101/2020.12.18.423106v1.full.pdf
