1 **SARS-CoV-2 spike-glycoprotein processing at S1/S2 and S2' and shedding of the ACE2 viral**  
2 **receptor: roles of Furin and TMPRSS2 and implications for viral infectivity and cell-to-cell**  
3 **fusion**

4 Rachid Essalmani<sup>1</sup>, Jaspreet Jain<sup>2,7</sup>, Delia Susan-Resiga<sup>1,7</sup>, Ursula Andréo<sup>1,2,7</sup>, Alexandra  
5 Evagelidis<sup>1</sup>, Rabeb Mouna Derbali<sup>1</sup>, David N. Huynh<sup>1</sup>, Frédéric Dallaire<sup>2</sup>, Mélanie Laporte<sup>2</sup>,  
6 Adrien Delpal<sup>3</sup>, Priscila Sutto-Ortiz<sup>3</sup>, Bruno Coutard<sup>4</sup>, Claudine Mapa<sup>5</sup>, Keith Wilcoxon<sup>5</sup>, Etienne  
7 Decroly<sup>3</sup>, Tram NQ Pham<sup>2</sup>, Éric A. Cohen<sup>2,6\*</sup> & Nabil G. Seidah<sup>1\*</sup>

8 <sup>1</sup> **Laboratory of Biochemical Neuroendocrinology Montreal Clinical Research Institute**  
9 (IRCM, affiliated to the Univ. of Montreal) 110 Pine Ave west, Montreal, QC, H2W1R7, Canada

10 <sup>2</sup> **Laboratory of Human Retrovirology Montreal Clinical Research Institute** (IRCM, affiliated  
11 to the University of Montreal) 110 Pine Ave west, Montreal, QC, H2W1R7, Canada

12 <sup>3</sup> **AFMB, CNRS, Université Aix-Marseille, CNRS, UMR 7257, Case 925, 163 Avenue de Luminy,**  
13 13288 Marseille Cedex 09, France, Marseille, France

14 <sup>4</sup> **Unité des Virus Émergents (UVE: Aix-Marseille Univ - IRD 190 - Inserm 1207 - IHU**  
15 Méditerranée Infection), Marseille, France

16 <sup>5</sup> **Boston Pharmaceuticals, Translational Research, 55 Cambridge Parkway, Suite 400,**  
17 Cambridge, MA 02142, USA

18 <sup>6</sup> **Department of Microbiology, Infectiology and Immunology, Université de Montréal,**  
19 Montréal, Québec, Canada

20 <sup>7</sup> Each of these authors contributed equally: Jaspreet Jain, Delia Susan-Resiga and Ursula Andreo

21 \*Corresponding authors: [seidahn@ircm.qc.ca](mailto:seidahn@ircm.qc.ca); [eric.cohen@ircm.qc.ca](mailto:eric.cohen@ircm.qc.ca)

22 Short title: **Furin & TMPRSS2: spike cleavage & SARS-CoV-2 infection**

24 **ABSTRACT**

25 The spike (S)-protein of SARS-CoV-2 binds ACE2 and requires proteolytic “priming” at **PRRAR**<sub>685</sub>↓  
26 into S1 and S2 (cleavage at S1/S2), and “fusion-activation” at a S2’ site for viral entry. *In vitro*, Furin  
27 cleaved peptides mimicking the S1/S2 cleavage site more efficiently than at the putative S2’, whereas  
28 TMPRSS2 inefficiently cleaved both sites. In HeLa cells Furin-like enzymes mainly cleaved at S1/S2  
29 during intracellular protein trafficking, and S2’ processing by Furin at **KPSKR**<sub>815</sub>↓ was strongly  
30 enhanced by ACE2, but not for the optimized S2’ **KRRKR**<sub>815</sub>↓ mutant (μS2’), whereas  
31 individual/double KR815AA mutants were retained in the endoplasmic reticulum. Pharmacological  
32 Furin-inhibitors (Boston Pharmaceuticals, BOS-inhibitors) effectively blocked endogenous S-protein  
33 processing in HeLa cells. Furthermore, we show using pseudotyped viruses that while entry by a “pH-  
34 dependent” endocytosis pathway in HEK293 cells did not require Furin processing at S1/S2, a “pH-  
35 independent” viral entry in lung-derived Calu-3 cells was sensitive to inhibitors of Furin (BOS) and  
36 TMPRSS2 (Camostat). Consistently, these inhibitors potently reduce infectious viral titer and  
37 cytopathic effects, an outcome enhanced when both compounds were combined. Quantitative analyses  
38 of cell-to-cell fusion and spike processing revealed the key importance of the Furin sites for syncytia  
39 formation. Our assays showed that TMPRSS2 enhances fusion and proteolysis at S2’ in the absence  
40 of cleavage at S1/S2, an effect that is linked to ACE2 shedding by TMPRSS2. Overall, our results  
41 indicate that Furin and TMPRSS2 play synergistic roles in generating fusion-competent S-protein, and  
42 in promoting viral entry, supporting the combination of Furin and TMPRSS2 inhibitors as potent  
43 antivirals against SARS-CoV-2.

44

45 **IMPORTANCE**

46 SARS-CoV-2 is the etiological agent of COVID-19 that resulted in >5 million deaths. The spike  
47 protein (S) of the virus directs infection of the lungs and other tissues by binding the angiotensin-

48 converting enzyme 2 (ACE2) receptor. For effective infection, the S-protein is cleaved at two sites:  
49 S1/S2 and S2'. Cleavage at S1/S2, induces a conformational change favoring the recognition of  
50 ACE2. The S2' cleavage is critical for cell-to-cell fusion and virus entry into host cells. Our study  
51 contributes to a better understanding of the dynamics of interaction between Furin and TMPRSS2  
52 during SARS-CoV-2 entry and suggests that the combination of a non-toxic Furin inhibitor with a  
53 TMPRSS2 inhibitor could significantly reduce viral entry in lung cells, as evidenced by an average  
54 synergistic ~95% reduction of viral infection. This represents a powerful novel antiviral approach  
55 to reduce viral spread in individuals infected by SARS-CoV-2 or future related coronaviruses.

## 56 57 **INTRODUCTION**

58 Epidemics date from prehistoric times but are exacerbated by overcrowding and human impact on the  
59 ecosystem (1). The RNA coronaviruses (CoV) are zoonotic pathogens that occasionally spread in the  
60 human population, causing respiratory, enteric, renal, and neurological diseases (2). Electron  
61 microscopy of CoV revealed that the lipid envelope of each virion is surrounded by a “crown”-like  
62 structure (3), composed of multiple copies of a viral surface glycoprotein known as “spike” (S), which  
63 is essential for receptor binding and virus entry. Severe Acute Respiratory Syndrome coronavirus  
64 (SARS-CoV-1) and Middle East Respiratory Syndrome coronavirus (MERS-CoV) are infectious  
65 pathogenic viruses that appeared in humans at the beginning of the 21<sup>st</sup> century (2, 4). At the end of  
66 2019, a third CoV, namely SARS-CoV-2, emerged causing widespread respiratory and vascular  
67 illnesses (5), coined COVID-19 (6).

68 Like envelope glycoproteins of many infectious viruses (7-9), the secretory type-I membrane-bound  
69 S of SARS-CoV-2 is synthesized as a precursor (proS) that undergoes post-transcriptional cleavages  
70 by host cell proteases at specific sites to allow viral entry. During infection, the trimeric proS  
71 (monomer, 1,272 residues) is first processed at an S1/S2 cleavage site (Fig. 1A). Unlike SARS-CoV-

72 1, the S-protein of SARS-CoV-2 exhibits an insertion of four critical amino acids (PRRA) at the S1/S2  
73 junction (10-12), forming a canonical **PRRAR**<sub>685</sub>↓ Furin-like cleavage site (FCS). Such “priming”  
74 step divides the protein into two subunits S1 and S2 held together by non-covalent interactions.  
75 Following S-protein priming, the N-terminal S1-ectodomain undergoes a conformational change that  
76 exposes its receptor-binding-domain (RBD) (13), which recognizes the ACE2 entry receptor (11). The  
77 S2-subunit, which is responsible for the fusogenic activity of the spike-S glycoprotein, contains an  
78 additional “fusion-activation” proteolytic site (S2’) followed by an  $\alpha$ -helical fusion peptide (FP) and  
79 two heptad-repeat domains (HR1 and HR2) preceding the transmembrane domain (TM) and cytosolic  
80 tail (CT) (Fig. 1A). It is thought that cleavage at S2’ triggers large-scale rearrangements, including a  
81 refolding step that is associated with the separation of S1- and S2-subunits and exposure of the  
82 hydrophobic  $\alpha$ -helix FP, favoring fusion of viral and host cell membranes leading to virus entry (14).  
83 Fusion with host cells can occur either at the cell surface (pH-independent) or with internal  
84 membranes following endocytosis (pH-dependent) (15). However, the cognate host-cell proteases  
85 responsible for the S1/S2 and S2’ cleavages vary between coronaviruses and cell types (11, 12, 16-  
86 19).

87 The proprotein convertases (PCs; genes *PCSKs*) constitute a family of nine secretory serine  
88 proteases that regulate various processes in both health and disease states (20). Through  
89 proteolysis, PCs are responsible for the activation and/or inactivation of many secretory precursor  
90 proteins, including virus/pathogen surface glycoproteins (9, 20). Seven PCs, including the widely  
91 expressed Furin, PC5A, PACE4 and PC7, cleave secretory substrates at specific single/paired basic  
92 amino acids (aa) within the motif (K/R)-X<sub>n</sub>-(K/R)↓, where X<sub>n</sub>= 0, 2, 4 or 6 spacer X residues (20).  
93 Because of their critical functions, PCs, especially Furin (21), are implicated in many viral  
94 infections by inducing specific cleavages of envelope glycoproteins, a condition that allows not

95 only the fusion of the viral lipid envelope with host cell membranes (9, 20), but can also lead to  
96 cell-to-cell fusion (syncytia), especially for viruses that undergo pH-independent fusion (22, 23).

97 As the S1/S2 cleavage of SARS-CoV-2 is thought to play a critical role for cellular receptor  
98 recognition and virus entry, the efficacy and extent of this activation step by host proteases might  
99 be a key determinant regulating cellular tropism, viral pathogenesis, and human-to-human  
100 transmission. In contrast to SARS-CoV-1, the proS of SARS-CoV-2 contains a structurally  
101 exposed **PRRAR**<sub>685</sub>↓**SV** motif (10, 11) (Fig. 1A), which corresponds to a canonical FCS (9, 10,  
102 20). This Furin-like motif is presumably cleaved during *de novo* virus egress (23) for S-protein  
103 priming and may play a key role for the efficient spread of SARS-CoV-2 to various human tissues  
104 compared to the more limited tropism of other lineage B β-coronaviruses (10, 24). Furthermore,  
105 based on the predicted S2' **KPSKR**<sub>815</sub>↓**SF** sequence of SARS-CoV-2, we proposed (10) that Furin-  
106 like enzymes could also cleave at this S2' site (Fig. 1A). Indeed, various reports have since  
107 supported the implication of Furin in the S1/S2 priming of the S-protein in human cell culture  
108 models (12, 25, 26) and *in vivo* in mice, hamsters and ferrets (27, 28). In addition, it was also  
109 suggested that the cell surface type-II transmembrane serine protease 2 (TMPRSS2) can enhance  
110 fusion by cleavage at S2', but that S1/S2 cleavage is mostly Furin-dependent (18). The ability of  
111 the Arg/Lys-specific TMPRSS2 (29, 30) to directly cleave at S2' was suggested based on the viral  
112 entry blockade by the TMPRSS2 inhibitor Camostat (31-33), and through silencing of TMPRSS2  
113 expression using a morpholino oligomer (18), but direct evidence of its involvement in such spike  
114 protein processing at S2' is still lacking. Thus, it is likely that one or more proteases regulate  
115 SARS-CoV-2 entry into human airway epithelial cells (18, 24). Furthermore, since the tissue-  
116 expression of TMPRSS2 is restricted to a limited set of cell types compared to that of the  
117 ubiquitously expressed Furin, the activity of the latter may widen viral tropism (34).

118 Thus, the major goals of the present study were to precisely define the respective roles of Furin and  
119 TMPRSS2 in the fusion activation, and to test the consequences of their inhibition on SARS-CoV-2  
120 infectivity and S-mediated cell-to-cell fusion. Herein, using a multi-disciplinary approach, we provide  
121 mechanistic evidence supporting a critical role of the proprotein convertase Furin in the processing of  
122 SARS-CoV-2 spike protein. Specifically, we map the exact S2' processing site by proteomics and  
123 highlight by mutagenesis the functional importance of S1/S2 and S2' regions in viral entry and cell-  
124 to-cell fusion. For the first time, we demonstrate that three novel cell-permeable small molecules  
125 inhibitors of proprotein convertases developed by Boston Pharmaceuticals, referred hereafter as BOS-  
126 inhibitors, can potently inhibit proS processing at S1/S2 and S2' by endogenous Furin-like proteases  
127 leading to efficient inhibition of viral entry, viral replication, and cell-to-cell fusion. Finally, our work  
128 sheds a new light on the role of TMPRSS2 in promoting ACE2 shedding and enabling S2' processing,  
129 thereby leading to enhanced cell-to-cell fusion.

130

## 131 **RESULTS**

132 **Comparative analysis of cleavage of SARS-CoV-2 peptides mimicking S1/S2 and S2'**  
133 **processing sites by Furin and TMPRSS2.** Furin is thought to be important in the processing of  
134 SARS-CoV-2 spike-glycoprotein (S) at the S1/S2 site (10, 24) while TMPRSS2 has been proposed to  
135 have an important role in activating S at S2' (18, 31-33) (Fig. 1A). Nevertheless, the relative  
136 contributions of Furin and TMPRSS2 towards cleavage of SARS-CoV-2 S glycoprotein at both sites  
137 remain poorly defined. Thus, the susceptibility of SARS-CoV-2 S glycoprotein to Furin-cleavage  
138 was first assessed *in vitro*. Incubation of quenched fluorogenic peptides encompassing S1/S2 and  
139 S2' sites (Supporting Information SI-Table 1) demonstrated that the S1/S2 site of SARS-CoV-2 S  
140 was efficiently cleaved by 2 nM Furin at pH 7.5 (Fig. 1B), whereas the S1/S2 site of SARS-CoV-1,  
141 which lacks an FCS, was not cleaved (Fig. 1B). Furin less efficiently cleaved the SARS-CoV-2-mimic

142 peptide at S2', requiring 50-fold higher enzyme concentrations (100 nM) to detect cleavage (inset Fig.  
143 1B). The high specificity of the SARS-CoV-2 for processing at Furin-like motifs was next confirmed  
144 by demonstrating that substitutions of basic residues at the S1/S2 cleavage site (RRAA<sub>685</sub>↓S,  
145 ARAA<sub>685</sub>↓S, ARAR<sub>685</sub>↓S) dramatically impaired S1/S2 cleavage (Fig. 1B). Altogether, these data  
146 demonstrate that *in vitro* Furin best cleaves at S1/S2 and less efficiently at S2'. In contrast, TMPRSS2  
147 did not efficiently cleave the S1/S2 and S2' peptides (Fig 1C). The cleavage at S1/S2 became  
148 detectable only when TMPRSS2 was present at high concentration (50 nM). However, different from  
149 Furin, under this condition TMPRSS2 cleavage of peptides mimicking the S1/S2 Ala-mutants RRAA,  
150 ARAA and ARAR and S2' was also evident (Fig. 1C). Taken together, these data emphasize the  
151 critical importance of the P1 and P4 Arg for Furin-mediated cleavage at S1/S2 and suggest that the  
152 likely Arg-motif recognized by TMPRSS2 is either (Ala/Arg)-Arg↓Ala or Ala-Arg↓Ser with a  
153 preference for Ala at P2 over Arg, and Ala or Ser at P1'.

154

155 **Furin and Furin-like proteases can process proS at S1/S2 and S2' sites.** To examine the ability  
156 of Furin and Furin-like enzymes to process the precursor proS of SARS-CoV-2 *in cellulo*, we used a  
157 HeLa cells model, which endogenously express Furin but not TMPRSS2 or ACE2 (*not shown*), as  
158 reported earlier (35). Here, we found that endogenous enzymes efficiently processed a V5-tagged proS  
159 (Fig. 1A), likely at the S1/S2 junction to generate a ~100 kDa S2-like fragment (Fig. 2A). Interestingly,  
160 when the proprotein convertases PC5A, Furin, PC7 or PACE4 were transiently overexpressed,  
161 cleavage at this site became more prominent. Of note, a partial knockdown of Furin decreased S2  
162 levels by more than 60% (SI-Fig. 1A). Furthermore, it was only when Furin or PC5A were  
163 overexpressed that cleavage at a potentially S2' site was noticeable, yielding a ~75 kDa fragment (Fig.  
164 2A). The remaining ~200 kDa proS<sub>im</sub> corresponded to an immature precursor form that had not exited  
165 the ER, as attested by its sensitivity to both endoglycosidase-F and endoglycosidase-H (SI-Fig. 1B)

166 and insensitivity to Furin-like convertases, which are only active in the TGN and/or cell  
167 surface/endosomes (20, 36).

168 To precisely define the ~100-kDa fragment, we mutated the S1/S2 site **RRAR**<sub>685</sub>↓S and found that  
169 the double Ala-mutant [**ARA**<sub>685</sub>] (denoted μS1/S2) abrogated processing at S1/S2 and putative S2'  
170 (Fig. 2B), highlighting once again the importance of the P4- and P1-Arg for recognition by Furin-like  
171 enzymes (20). The loss of Furin-like cleavage at S1/S2 resulted in accumulation of a higher molecular  
172 size band (~230 kDa), representing mature proS, that exited the endoplasmic reticulum (ER), as  
173 confirmed by its resistance to endoglycosidase-H, while still sensitive to endoglycosidase-F digestion  
174 (SI-Fig. 1B).

175 To further define the Arg-residues critical for processing at S1/S2, we assessed the effect of single  
176 residue mutations: R682A, R685A and S686A and confirmed the critical importance of P1-Arg<sub>685</sub> or  
177 P4-Arg<sub>682</sub> for the generation of S2 by endogenous Furin (SI-Fig. 1C). However, unlike μS1/S2 (Fig.  
178 2B), these single mutants were partially cleaved by overexpressed Furin (SI-Fig. 1C), reflecting the  
179 multi-basic nature of the S1/S2 recognition sequence and suggesting the importance of the P3 Arg<sub>683</sub>  
180 (37). The S686A mutant was based on the prediction that Ser<sub>686</sub> could be O-glycosylated (38), which  
181 may hamper processing at S1/S2 (39). However, like the WT-S, the S686A mutant was efficiently  
182 processed by Furin into S2 and S2' (SI-Fig. 1C), suggesting the lack of O-glycosylation at Ser<sub>686</sub> in  
183 HeLa cells.

184 We next used site-directed mutagenesis to identify the exact S2' site cleaved by Furin. However,  
185 K814A, R815A and K814R815A mutants at P1 and P2 residues (20) of the predicted S2' site  
186 (**KPSKR**<sub>815</sub>↓SF) altered S-protein trafficking resulting in a predominantly ER-retained proS<sub>im</sub>  
187 protein, especially for the R815A and the double mutant (SI-Fig. 1D). Therefore, we resorted to  
188 mass spectrometry analysis of proteins migrating at the S2' position to unambiguously identify  
189 this site. The peptides generated by a Lys-specific protease (**K**<sub>814</sub>↓) allowed for the discrimination



190 between SFIEDLLFNK<sub>825</sub> that would be generated if Furin cleaved at Arg<sub>815</sub>, and  
191 R<sub>815</sub>SFIEDLLFNK<sub>825</sub> that would be derived from N-terminally extended proteins, e.g., S2.  
192 Proteomic data (Fig. 2C) revealed a >50-fold higher ratio of SFIEDLLFNK<sub>825</sub> to  
193 RSFIEDLLFNK<sub>825</sub> for the S2' product, demonstrating that the N-terminus of S2' starts at Ser<sub>816</sub>  
194 and that Furin cleaves after Arg<sub>815</sub>↓ in the sequence KPSKR<sub>815</sub>↓SFIEDLLFNKVT (Fig. 1A). To  
195 further demonstrate the role of Furin in S2' cleavage we generated a Furin-optimized S2' site  
196 (called μS2') with a polybasic sequence KRRKR<sub>815</sub>↓SF in proS and found that this derivative was  
197 very efficiently cleaved by endogenous and especially by overexpressed Furin, yielding a similar  
198 ~75 kDa fragment (Fig. 2D). Altogether, these data demonstrate that the S2' cleavage occurs at  
199 Arg<sub>815</sub>↓ and further reveal that this site can be partially processed by overexpressed Furin and/or  
200 PC5A.

201

202 **Processing at S2' by Furin is enhanced in the presence of ACE2.** Immunocytochemical  
203 analyses of HeLa cells co-expressing S or μS1/S2-S and ACE2 showed that both S-proteins and ACE2  
204 co-localized at the cell surface independent of the state of proS processing (SI-Fig. 2). Given that  
205 binding of SARS-CoV-2 S-trimer to the dimeric ACE2 receptor has been proposed to trigger a  
206 conformational change in S1, promoting cleavage at S2' (13, 40), we next examined whether this  
207 phenomenon would effectively increase/promote S2' processing by Furin. To this end, we expressed  
208 the V5-tagged proS spike protein together with ACE2 and Furin in HeLa cells. We found that while  
209 not significantly affecting S1/S2 cleavage, ACE2 expression seemed to stabilize the S2 subunit and to  
210 strongly enhance the generation of S2' by endogenous and overexpressed Furin (Fig. 3A). Amazingly,  
211 in the presence of ACE2, the μS1/S2-S, which is otherwise resistant to cleavage at S1/S2 by  
212 endogenous or overexpressed Furin (Fig. 2B), can be partially cleaved directly into S2' by

213 overexpressed Furin (Fig. 3B, last lane). Taken together, we conclude that binding of S-protein to  
214 ACE2 likely facilitates exposure of the S2' site (41), thereby enhancing Furin processing at S2'.

215

216 **Furin-inhibitors block S1/S2 and S2' cleavages.** Given the importance of Furin in proS  
217 processing at the S1/S2 and S2' sites, we next evaluated the activity of three novel non-toxic, cell-  
218 permeable Furin-like inhibitors developed by Boston Pharmaceuticals available as oral (BOS-981,  
219 BOS-318) or inhalable (BOS-857) formulations (Fig. 4A). Accordingly, we first tested *in vitro* the  
220 efficacy and selectivity of these inhibitors on purified soluble forms of Furin, PC5A, PACE4 and  
221 PC7 using a quenched fluorogenic substrate FAM-QRVRRAVGIDK-TAMRA. As shown, the  
222 inhibitors effectively blocked substrate processing by all convertases with an IC<sub>50</sub> of ~7-9 nM  
223 compared to ~9-10 nM for the known cell-permeable PC-inhibitor decanoyl-RVKR-  
224 chloromethylketone (dec-RVKR-cmk) (42, 43) (Fig. 4B). The Furin S1/S2 cleavage was also  
225 validated using a 12-residue quenched fluorogenic substrate DABSYL/Glu-TNSPRRAR↓SVAS-  
226 EDANS mimicking the S1/S2 priming site. The inhibition deduced after hill-plot curve fitting (Fig.  
227 4C) gave an estimated IC<sub>50</sub> of 4 ± 0.7 nM for BOS-981, 32 ± 4 nM for BOS-857 and 35 ± 5 nM  
228 for BOS-318. As well, BOS-inhibitors inhibited endogenous Furin-like processing of a dibasic  
229 bone morphogenic protein 10 (BMP10)-mimic (43) with an IC<sub>50</sub> of ~8 nM *versus* 5 nM for the  
230 dec-RVKR-cmk as determined by a cell-based Golgi imaging assay with U2OS cells (Fig. 4D).  
231 We further showed that BOS-inhibitors efficiently blocked S1/S2 and S2' processing by  
232 endogenous Furin-like enzymes, resulting in a near complete inhibition at 0.3 μM, also obtained  
233 with 50 μM of dec-RVKR-cmk (RVKR; Fig. 4E). Overall, our data clearly demonstrate a role of  
234 Furin in the processing of proS at the S1/S2 and S2' sites.

235

236 **Furin-like inhibitors reduce virus production in SARS-CoV-2-infected cells.** We next  
237 examined whether blocking the processing of proS by BOS-inhibitors modulates SARS-CoV-2  
238 infection. Indeed, in lung derived Calu-3 cells pretreated with 1  $\mu$ M BOS-inhibitors for 24h before  
239 infection, we observed significantly decreased viral titers at 12, 24 and 48h post-infection (Fig.  
240 5A). Importantly, the inhibitory effect was dose-dependent, reducing viral burden up to >30-fold  
241 with 1  $\mu$ M BOS-318 (Fig. 5B; left panel). As well, the IC<sub>50</sub> and selectivity index (44) of BOS-318  
242 were 0.2  $\mu$ M and 475, respectively (Fig. 5B; right panel). Importantly, the levels of spike (full  
243 length and cleaved S) and nucleocapsid proteins in the supernatant and cells were decreased in a  
244 dose-dependent manner (Fig. 5C), underscoring the crucial role played by Furin-like convertases  
245 in SARS-CoV-2 infection in this lung epithelial cell model. A similar analysis with BOS-857 and  
246 BOS-981 revealed comparable antiviral effects and selectivity index (SI-Figs. 3A, B). In addition,  
247 BOS-inhibitors were also evaluated in Vero E6 cells where SARS-CoV-2 entry and infection is  
248 established primarily *via* the endocytic pathway (11, 24). In this system and as expected, treatment  
249 with BOS-inhibitors led to weaker effect since we observed a decreased virus production by only  
250 ~2.6-5.7-fold (SI-Fig. 4), possibly reflecting a role of Furin-like activity in early endosomes (36)  
251 for pH-dependent virus entry in Vero cells.

252 Since TMPRSS2 has been proposed to be important for viral entry at the plasma membrane, we  
253 next determined whether combining BOS-inhibitors and the TMPRSS2-inhibitor Camostat would  
254 have a synergistic effect, leading to a more pronounced antiviral effect in Calu-3. As shown,  
255 although these compounds could reduce viral replication individually, their co-treatment resulted  
256 in a synergistic inhibition of  $\sim 95 \pm 2.5\%$  (>70-fold) of progeny infectious viruses (Fig. 5D and SI-  
257 Fig. 5), reinforcing the importance of both Furin-like proteases and TMPRSS2 in promoting  
258 efficient SARS-CoV-2 infection of Calu-3 cells.

259        **Furin-like inhibitors reduce viral entry by blocking processing of proS during biosynthesis**  
260        **and at the viral entry site.** The more dramatic impact observed with Furin-like inhibitors on virus  
261        infection of Calu-3 cells *versus* Vero cells suggests that these inhibitors affect mainly the pH-  
262        independent entry mechanism. Thus, we next assessed the effect of BOS-inhibitors on viral entry.  
263        Using nanoluciferase-expressing HIV particles pseudotyped with WT,  $\mu$ S1/S2 or  $\mu$ S2' S-proteins, we  
264        observed that the viral entry of  $\mu$ S1/S2-S pseudovirions is  $\sim$ 10-fold reduced in Calu-3 cells (Fig. 6A).  
265        In contrast, all three pseudotyped viruses were at least 10-fold more infectious in HEK293T-ACE2  
266        cells, suggesting that S-priming at S1/S2 is required for optimal viral entry in Calu-3 cells, but  
267        dispensable or perhaps even less desirable in HEK293T-ACE2 cells (Fig. 6A). Since these findings  
268        were similar to those in Vero E6 cells (45), we surmise that viral entry in HEK293T-ACE2 cells was  
269        through the same pH-dependent, endocytic route as reported for Vero cells (46, 47). This agrees with  
270        the fact that HEK293 cells allow endocytosis of SARS-CoV-2 pseudovirions *via* clathrin-coated  
271        vesicles (48). In the case of  $\mu$ S2'-S-expressing viral particles, entry was more efficient in both cell  
272        types (compare the same-coloured dots between WT-S and  $\mu$ S2'-S in absence of BOS, Fig. 6A),  
273        implying that S cleavage at the S2' optimized Furin-like site could enhance viral entry. When BOS-  
274        318 was present during biosynthesis of pseudovirions, processing of WT-S and  $\mu$ S2'-S was blocked  
275        (Fig. 6B), leading to reduced viral entry in Calu-3 by  $\sim$ 3.6- to  $\sim$ 12.5-fold, respectively (Fig. 6A). Thus,  
276        BOS-318 treatment phenocopied the effect of the  $\mu$ S1/S2 in both cell types. Nevertheless, under this  
277        condition viral entry in HEK293T-ACE2 cells was enhanced by  $\sim$ 10-fold for WT-S and  $\sim$ 2-fold for  
278         $\mu$ S2'-S (Fig. 6A), suggesting that viral entry by the pH-dependent pathway does not require FCS  
279        processing.

280        Having observed the negative effect of BOS-318 on S processing by particle-producing cells, we  
281        asked whether pre-treating target cells with BOS-318 would also affect entry of SARS-CoV-2  
282        pseudoparticles. In Calu-3 cells, where viral entry occurs primarily through fusion at the plasma

283 membrane (46), we observed reduced viral entry by ~3.8-fold for WT-S and ~14-fold for  $\mu$ S2'-S (Fig.  
284 6C). This emphasizes a significant contribution of Furin to the processing and priming of S at the  
285 plasma membrane of Calu-3 cells after ACE2 recognition. The fact that BOS-318 had a more  
286 pronounced effect on entry by  $\mu$ S2'-S-containing viral particles was not surprising given the very  
287 efficient S2' processing of this mutant by Furin (Fig. 2D). Of note, viral entry by WT-S pseudoparticles  
288 was more affected by 100  $\mu$ M Camostat compared to that by  $\mu$ S2'-S viral particles (Fig. 6C). Here,  
289 entry was reduced by ~8.6-fold for WT-S and ~3.2-fold for  $\mu$ S2'-S, suggesting that Furin plays a more  
290 prominent role in the entry of  $\mu$ S2'-S *versus* WT-S viral particles. Lastly, the combined pre-treatment  
291 of both BOS-318 and Camostat led to a complete block of viral entry, highlighting the importance of  
292 both Furin and TMPRSS2 in mediating viral fusion at the plasma membrane.

293  
294 **Furin-like inhibitors decrease cell-to-cell fusion and syncytia formation.** To assess whether  
295 BOS-inhibitors also affect cell-to-cell fusion, we developed a co-culture assay in which donor HeLa  
296 cells express HIV Tat and the fusogenic S-protein, while acceptor HeLa TZM-bl cells express ACE2  
297 and Tat-driven luciferase (49) (Figs. 7A). As a proof-of-principle, we showed that when donor HeLa  
298 cells expressing HIV gp160 and Tat fused with acceptor cells expressing CD4 (SI-Fig. 6A, panel b),  
299 luciferase activity was increased compared to that observed in TZM-bl control cells co-cultured with  
300 donor HeLa cells expressing only Tat (SI-Fig. 6B). The expression of S-protein alone in donor HeLa  
301 cells did not induce fusion with acceptor TZM-bl control cells (SI-Fig. 6B). However, ACE2  
302 expression in TZM-bl allowed fusion with HeLa-expressing S-protein (SI-Fig. 6A, panel c; 6B) in a  
303 dose-dependent manner (SI-Fig. 6C), but no fusion was observed with  $\mu$ S1/S2-S (SI-Fig. 6A, panel  
304 d). Indeed, the linearity of our assay (correlation coefficient of 0.87) validated the use of luminescence  
305 as an indicator of cell-to-cell fusion (SI-Fig. 6C). Using this assay, we found that while donor cells  
306 expressing WT-S led to syncytia formation (Fig. 6B) and a >10-fold increased cell-to-cell fusion

307 compared to control (empty vector V, no S) cells (Fig. 6C), donor cells expressing  $\mu$ S1/S2-S did not  
308 promote any cell fusion even in the presence of ACE2 (Figs. 6C, D). Thus, the  $\mu$ S1/S2-S phenocopies  
309 the effect of BOS-inhibitors on cell-to-cell-fusion (Fig. 6C), whereby absence of Furin-activity would  
310 not allow fusion and demonstrates a key role of S1/S2 cleavage in S-mediated cell-to-cell fusion.  
311 Consistent with this finding, we observed an almost complete loss of cell fusion when donor cells were  
312 treated with BOS-inhibitors or the PC-inhibitor decanoyl-RVKR-cmk (RVKR; Fig. 6C) (43),  
313 emphasizing the critical role of Furin-cleavage in promoting ACE2-dependent cell-to-cell fusion in the  
314 context of acceptor cells that do not endogenously express TMPRSS2, such as HeLa cells. This fusion  
315 assay also enabled the assessment of the effects of some worldwide-spreading S-protein variants of  
316 SARS-CoV-2, which seem to affect viral traits such as transmissibility, pathogenicity, host range, and  
317 antigenicity of the virus (50, 51). Among these, we selected mutants that modify the Pro at the P5  
318 position of the S1/S2 site (Fig. 1A), i.e., the P681H and P681R associated with the  $\alpha$ - and  $\delta$ - variants,  
319 respectively (9). Our data showed that while the  $\mu$ S2' mutant did not affect cell-to-cell fusion, the  
320 P681H and P681R mutants significantly enhanced it by  $\sim$ 2-fold (Fig. 7D), in line with the higher  
321 transmissibility of the associated  $\alpha$ - and  $\delta$ - SARS-CoV-2 variants (50, 51) and increased cell-to-cell  
322 fusion (52).

323

#### 324 **TMPRSS2 promotes cell-to-cell fusion in the absence of Furin-mediated cleavage at S1/S2.**

325 Having shown the critical role of Furin-cleavage in promoting ACE2-dependent cell-to-cell fusion in  
326 HeLa cells that do not express TMPRSS2, we next examined the importance of TMPRSS2 in cell-to-  
327 cell fusion given its significant role in viral entry and replication (Figs. 5D and 6C). Thus, we analyzed  
328 fusion between donor cells expressing WT-S or  $\mu$ S1/S2-S (double tagged S-protein: HA at the N-  
329 terminus and V5 at the C-terminus) and acceptor cells expressing ACE2 in the absence or the presence  
330 of TMPRSS2 (Fig. 8). As shown, in the presence of ACE2, TMPRSS2 reduced fusion by  $\sim$ 2.1-fold in

331 the case of WT-S but increased it by ~2.4-fold in the case of  $\mu$ S1/S2-S (Fig. 8A). Under the same  
332 conditions, WB analyses showed that for WT-S, the TMPRSS2 expression decreased by ~4-fold (3.8  
333 *versus* 0.9) the relative levels of S2 and modestly increased by ~1.5-fold (0.6 *versus* 0.9) the relative  
334 levels of S2'. In contrast, for  $\mu$ S1/S2-S, expression of TMPRSS2 increased S2' levels by ~7-fold (0.1  
335 *versus* 0.7) without any detectable change in S2 (0.6 *versus* 0.5) (Fig. 8B). Therefore, in the presence  
336 of ACE2, the levels of S2 correlate with cell-to-cell fusion in the case of WT-S that is well cleaved at  
337 S1/S2 by Furin. In contrast, fusion correlates best with S2' levels, when cleavage at S1/S2 is limited  
338 ( $\mu$ S1/S2-S). Interestingly, secretion of the HA-tagged, N-terminal S1 subunit (aa 14-685; Fig. 1A) was  
339 more pronounced for WT-S compared to  $\mu$ S1/S2-S (Fig. 8B). Yet, in both cases, the extent of S1  
340 release was not modulated by the presence of TMPRSS2, suggesting that TMPRSS2-mediated  
341 enhanced fusion of  $\mu$ S1/S2 was not a consequence of altered S1/S2 cleavage (Fig. 8B).

342

343 **Mechanism by which TMPRSS2 promotes cell-to-cell fusion.** To assess whether TMPRSS2  
344 promoted cell-to-cell fusion by enhancing S2' cleavage in the complete absence of S1/S2 priming, we  
345 generated a new S-derivative lacking all Arg at S1/S2 (Fig. 1), namely  $\mu$ AS1/S2 (AAAA<sub>685</sub>)-S, and  
346 hence different from  $\mu$ S1/S2 (Fig. 1C; ARAA mutant), it would not be cleaved by TMPRSS2 or Furin.  
347 Cell-to cell fusion was assessed following incubation of cells expressing WT-S or  $\mu$ AS1/S2-S with  
348 acceptor cells expressing ACE2 and/or TMPRSS2. In this context, TMPRSS2 reduced fusion of WT-  
349 S by ~2.6-fold and enhanced that of  $\mu$ AS1/S2-S by ~3.1-fold (Fig. 9A), as previously observed with  
350 the  $\mu$ S1/S2 mutant (Fig. 8A). Camostat completely restored TMPRSS2-reduced fusion with WT-S and  
351 largely attenuated the TMPRSS2-enhanced fusion with  $\mu$ AS1/S2 (Fig. 9A). This revealed that in the  
352 presence of ACE2, TMPRSS2 could enhance fusion in absence of S1/S2 priming. We next assessed  
353 whether this effect could be related to the differential processing of the S protein and/or to ACE2

354 receptor shedding by TMPRSS2. The WB of cell lysates shows that treatment of acceptor cells with  
355 Camostat eliminated the TMPRSS2-induced reduction in S2 observed with WT-S (Fig. 9B), yet it did  
356 not significantly alter S2' levels either with WT-S or  $\mu$ AS1/S2 (Figs. 9B, C). In contrast, the WB of  
357 ACE2 reveal that TMPRSS2 strongly reduced the levels of mature membrane-bound ACE2 migrating  
358 at ~120 KDa, without affecting the lower molecular weight protein which correspond to an immature  
359 ER-retained form of ACE2 (ACE2<sub>im</sub>, Figs. 9B, C) that is sensitive to endoH digestion (*not shown*).  
360 These results show that ACE2 is shed by TMPRSS2, as proposed in earlier studies (33). As expected,  
361 we observed that ACE2 shedding by TMPRSS2 is almost completely blocked by Camostat (compare  
362 ACE2+TMP lanes DMSO to CAM) (Figs. 9B and C).

363 In contrast, the WB anti ACE2 reveal that TMPRSS2 strongly reduced the levels of mature  
364 membrane-bound ACE2 migrating at ~120 KDa, without affecting the lower molecular weight protein  
365 which correspond to an immature ER-retained form of ACE2 (ACE2<sub>im</sub>, Figs. 9B, C) that is sensitive  
366 to endoH digestion (*not shown*). These results suggest that ACE2 is shed due to TMPRSS2 cleavage  
367 as proposed in earlier studies (33). As expected, we observed that this effect of TMPRSS2 on ACE2  
368 processing is almost completely blocked by Camostat (compare ACE2+TMP lanes DMSO to CAM)  
369 (Figs. 9B and C). Finally, by analysing the release of S1 in the cell culture media we observed that  
370 TMPRSS2-induced release into the media of a longer ~175 kDa fragment from  $\mu$ AS1/S2, referred  
371 hereafter as S1<sub>L</sub> (Fig. 9C), which is not detected in presence of Camostat. The molecular weight of the  
372 S1<sub>L</sub> indicates that it corresponds to a TMPRSS2 cleavage of  $\mu$ AS1/S2-S at S2' (Fig. 9B).

373 These results suggest that TMPRSS2 modulation of fusion is complex, as TMPRSS2 alters both  
374 the integrity of ACE2 receptor, but also participates in S-processing as attested by the release of S1<sub>L</sub>  
375 which corresponds to the N-terminal cleavage product of  $\mu$ AS1/S2-S at S2'. Interestingly, we did not  
376 detect an associated increase in S2' levels, suggesting that after cleavage the fusion process occurs and  
377 the S2 protein is subsequently degraded, as suggested by a small degradation product seen on WB



378 (arrow in Figs. 9B, C). We surmise that in the presence of ACE2, TMPRSS2 facilitates the secretion  
379 of the N-terminal fragment S<sub>1L</sub> generated by cleavage at S2’.

380 Our next goal was to further decipher the contribution of ACE2 cleavage by TMPRSS2 and the  
381 seemingly opposite effects of TMPRSS2 on fusion activity with WT-S and  $\mu$ AS1/S2-S (and  $\mu$ S1/S2-  
382 S). Hence, since TMPRSS2 cleaves at single Arg and Lys residues (53), we tested the effect of multiple  
383 Arg/Lys to Ala mutants in segments close to the transmembrane domain of ACE2 (C0 + C4 in Fig.  
384 10A), which were previously proposed to limit the TMPRSS2-induced shedding (54). Accordingly,  
385 WB analyses (Fig. 10B) revealed that TMPRSS2, but not its Ser\* active site S441A mutant ( $\mu$ TMPR,  
386 Fig. 10B; SI-Fig. 7) sheds the membrane-bound ~120 kDa WT ACE2, releasing a major ~95 kDa and  
387 a minor ~80 kDa form into the media. In contrast, TMPRSS2 primarily generated the ~80 kDa  
388 fragment from the ACE2 (C0+C4) mutant. It should be mentioned that in the absence of TMPRSS2  
389 the extent of fusion for both WT-S and  $\mu$ AS1/S2-S was comparable between ACE2 (WT) and ACE2  
390 (C0+C4). Interestingly, in the context of the ACE2 (C0+C4) receptor mutant, we found that TMPRSS2  
391 no longer modulates the fusion of both WT-S and  $\mu$ AS1/S2-S (Fig. 10C). Importantly, and different  
392 from WT ACE2 (Figs. 8, 9), TMPRSS2 did not reduce the levels of S2 when ACE2 (C0+C4) was  
393 used (Fig. 10D), nor did it reduce fusion (Fig. 10C). Additionally, the TMPRSS2-enhanced secretion  
394 of the ~ 175 kDa S<sub>1L</sub> fragment in the absence of S1/S2 cleavage (Fig. 9C; SI-Fig. 7), was no longer  
395 detected in the media when ACE2 (C0+C4) was expressed on acceptor cells (Fig. 10D), correlating  
396 with the lack of fusion of  $\mu$ AS1/S2-S (Fig. 10C). Altogether, these results suggest for the first time that  
397 in the absence of Furin-mediated priming of S, TMPRSS2 promotes cell-to-cell fusion by generating  
398 a ~95 kDa sACE2 that likely binds the S<sub>1L</sub> cap (55) and favors its release.

399

400

401

## 402 DISCUSSION

403 Furin and TMPRSS2 have both been proposed to process the SARS-CoV-2 spike protein and  
404 promote viral entry and infection. In this study, we functionally characterize the role of Furin and  
405 TMPRSS2 and show their complementary role in SARS-CoV-2 mechanism of entry and infection.

406 Consistent with previous data (18, 33, 56, 57), processing at S1/S2 is required for optimal viral entry  
407 in Calu-3 lung epithelial cells. Indeed, mutation of the arginines of the FCS or blocking S1/S2 cleavage  
408 by a series of novel Furin-inhibitors effectively reduced SARS-CoV-2 entry in Calu-3 cells. In the  
409 context of cell-to-cell fusion, mutations of the FCS impaired syncytia formation in HeLa cells in the  
410 absence of TMPRSS2 in acceptor cells, and Furin-inhibitors phenocopied the effect of these S1/S2  
411 mutations. These results highlight the importance of Furin in promoting S-mediated cell-to-cell  
412 fusion. In contrast, in HEK293T cells, where SARS-CoV-2 likely enters *via* endocytosis in acidic  
413 endosomes, mutations of the FCS enhanced entry (Fig. 6), suggesting that cleavage at S1/S2 by Furin  
414 was not required for efficient S-processing by endosomal proteases (e.g., cathepsins) (58, 59). The pH-  
415 dependent entry pathway is sensitive to drugs increasing the pH of endosomal compartments, e.g.,  
416 hydroxy-chloroquine (47). Nevertheless, this drug failed to show significant improvement in COVID-  
417 19 patients (60, 61) or infected animals (62), supporting the notion that the virus can effectively utilize  
418 alternative entry pathways that are critical for virus entry, transmission and pathogenicity. The fact that  
419 Furin-cleavage at S1/S2 is conserved in SARS-CoV-2 isolated from COVID-19 patients and that  
420  $\Delta$ PRRA viruses are poorly infectious in hamsters (60), suggest that blocking viral entry through the  
421 pH-independent pathway is a viable approach towards thwarting SARS-CoV-2 dissemination. In this  
422 context, the non-toxic, small molecules BOS-inhibitors that were analyzed in this study, which can  
423 be delivered orally or by inhalation, deserve consideration as potential antivirals against acute  
424 SARS-CoV-2 infection. As observed in adult animal models, short-term inhibition of Furin would  
425 not cause severe side effects, despite the many physiological functions of this enzyme (20).

426 Our results also demonstrate that Furin can also process S at S2', a site that we map by proteomics  
427 to be at **KR**<sub>815</sub>↓SF. The latter S2' cleavage site was confirmed by introducing an optimized S2' site  
428 ( $\mu$ S2', KRRKR<sub>815</sub>↓SF) that was efficiently cleaved by Furin, yielding a protein fully competent  
429 for fusion in pseudotyped experiments. Importantly, we showed that the S2' processing is strongly  
430 increased when ACE2 receptor is expressed. Our results suggest that the recognition of the ACE2  
431 receptor by the spike protein induces a conformational change of the S2 domain and enhances  
432 cleavage of S2' site by cellular proteases such as Furin.

433 In contrast TMPRSS2 appears to cleave synthetic peptides encompassing the S1/S2 and S2'  
434 cleavage sites and proS protein in Hela cells less efficiently compared to Furin. TMPRSS2 has been  
435 reported to enhance the infectivity of SARS-CoV-1 and MERS-CoV *via* cleavages of the S-protein  
436 (53, 63), as reviewed in (4, 15, 23). The S1/S2 site VSLLR<sub>667</sub>↓ST of SARS-CoV-1 contains an  
437 Arg↓Ser cleavage motif that is propitious to cleavage by TMPRSS2 (53) but not by Furin. However,  
438 S1 production was minimal and fusion was observed only when donor cells expressing S-protein were  
439 co-cultured with acceptor cells expressing ACE2 and TMPRSS2 (53). In SARS-CoV-2 the S1  
440 released, presumably following cleavage of S at S1/S2 and ACE2 binding, is much reduced with  
441  $\mu$ S1/S2-S compared to WT-S, indicating that Furin-mediated cleavage at S1/S2 promotes a more  
442 efficient release of S1 (Fig. 8B). Additionally, in a co-culture system the relative levels of soluble S1  
443 fragment were not affected by the presence or absence of TMPRSS2 for WT and  $\mu$ S1/S2 (Fig. 8B).  
444 This suggests that the differential effect of TMPRSS2 on cell-to-cell fusion could not be attributed to  
445 its direct cleavage activity on S. Rather, we assert that TMPRSS2 primarily modulates cell-to-cell  
446 fusion in part *via* shedding of ACE2. In the presence of TMPRSS2 the extent of fusion would depend  
447 on a combination of reduced levels of full-length cell surface ACE2 and increased levels of sACE2  
448 that could act as a decoy to inhibit fusion (64). In that context, a human recombinant sACE2 that  
449 includes the collectrin domain but lacks the TM domain (hrsACE2, aa 1-740) (see Fig. 10A) effectively

450 blocked SARS-CoV-2 infection of Vero E6 cells (55). Indeed, our cell-to-cell fusion assay tested in  
451 co-culture revealed that the ~95 kDa sACE2 primarily produced by TMPRSS2 cleavage of ACE2  
452 resulted in lower levels of cellular ACE2 (Figs. 9B, 10B) and in impaired WT-S induced fusion (Figs.  
453 9A, 10C). In contrast, the mutant ACE2 (C0+ C4) was no longer sensitive to TMPRSS2 impairment  
454 of WT-S-induced fusion, suggesting that the ~80 kDa form of sACE2 primarily produced by  
455 TMPRSS2 cleavage of ACE2 (C0+C4), likely upstream of Lys<sub>619</sub>, may no longer be able to inhibit  
456 WT-S-fusion (Fig. 10C), but may still bind S1 as shown by cryoEM studies that used a short ACE2  
457 ectodomain (aa 19-615) (40). Altogether, these results suggest that the C-terminal collectrin-like  
458 domain (65, 66) of ACE2 (aa 616-768) (Fig. 10A), which is lost in the ~80 kDa form, may be critical  
459 for the ability sACE2 to inhibit cell-to-cell fusion of WT-S. Since Arg<sub>710</sub> and Arg<sub>716</sub> within the  
460 collectrin-like domain (Fig. 10A) have been reported to be implicated in ACE2 dimerization (66), their  
461 Ala mutation in the ACE2 (C0+C4) mutant should significantly impair ACE2 dimerization. Whether  
462 dimerization of ACE2 and the ~95 kDa sACE2 (Fig. 10B) are needed for efficient inhibition of WT-  
463 S-induced fusion (64) is yet to be confirmed.

464 In the context of endogenous expression of ACE2 and TMPRSS2, e.g., in Calu-3 cells (67, 68), our  
465 data show that Camostat significantly reduces SARS-CoV-2 infectivity (Fig. 6C), revealing that a  
466 TMPRSS2-like activity favors viral entry. Similarly, in the presence of BOS-inhibitors or absence of  
467 Furin cleavage at S1/S2, TMPRSS2 enhances cell-to-cell-fusion (Figs. 8A, 9A). HeLa cells expressing  
468 WT-S in donor cells and both ACE2 and TMPRSS2 in acceptor cells, exhibited reduced cell-to-cell  
469 fusion, a process inhibited by Camostat. This suggests that the relative contribution of TMPRSS2 to  
470 the shedding of ACE2 into sACE2 and cleavage of S-protein at S2' is cell-type dependent. Future  
471 experiments may unravel the underlying mechanism that would explain the difference between the  
472 HeLa and Calu-3 cells. Our study highlights a complex dynamic between spike, ACE2, Furin and  
473 TMPRSS2 (Fig. 11) and points to a potential role of TMPRSS2, which in the absence of S1/S2

474 processing (e.g.,  $\mu$ AS1/S2 or in presence of BOS-inhibitors) can by shedding ACE2 facilitate S2'  
475 cleavage and cell-to-cell fusion.

476 The human airway epithelium is an important site of early SARS-CoV-2 infection (18, 24, 69). The  
477 virus can then disseminate to other tissues/cells such as gut, liver, endothelial cells and macrophages  
478 where ACE2, Furin and TMPRSS2 are co-expressed (70). While Furin is mostly found in the TGN, it  
479 is also present in endosomes and on apical/basolateral plasma membranes in polarized cells such as  
480 those of the lung, small intestine and kidney (71). In contrast, TMPRSS2 is mostly found at the apical  
481 membrane of secretory epithelia (72), suggesting that both enzymes would be poised to process the S-  
482 protein on the apical side. Their relative abundance may be an important factor governing which of the  
483 two might cleave S at the S2' cleavage site. The complementarity and interchangeability of these  
484 different proteases, together with those in endosomes, likely allows SARS-CoV-2 to exhibit a wider  
485 tropism compared to SARS-CoV-1 (73). In this context, we note that randomized placebo controlled  
486 clinical trials using an orally administered TMPRSS2 inhibitor Camostat mesilate three times a day for  
487 treatment of COVID-19 patients did not show improvement in outcomes (74). We believe that the  
488 maximal benefit of TMPRSS2 inhibition could be achieved when Furin activity is also inhibited, since  
489 our results showed that TMPRSS2 activity is preponderant in the context of absence of cleavage at  
490 S1/S2. Furthermore, the intranasal delivery of both agents would be expected to have less side effects  
491 and be more effective, as it would directly target the airway epithelia of the nose and the lungs, the  
492 major sites of SARS-CoV-2 entry.

493 Altogether, our results strongly support the notion that a combination of BOS- and selective  
494 TMPRSS2-inhibitors would provide a more effective blockade against SARS-CoV-2 infection  
495 (Figs. 5D, 11). It would now be interesting to validate *in vivo* whether a combination of a BOS-  
496 inhibitor and a more potent/selective TMPRSS2-inhibitor (75) together with hydroxy-chloroquine  
497 (56, 76) would synergize the antiviral effect of these entry inhibitors.

498 The availability for worldwide distribution of various SARS-CoV-2 vaccines that inhibit the  
499 accessibility of the RBD of S-protein to ACE2 ([https://www.raps.org/news-and-articles/news-](https://www.raps.org/news-and-articles/news-articles/2020/3/covid-19-vaccine-tracker)  
500 [articles/2020/3/covid-19-vaccine-tracker](https://www.raps.org/news-and-articles/news-articles/2020/3/covid-19-vaccine-tracker)) represents a major advance to limit the spread of SARS-  
501 CoV-2 infections. However, it is still not known with certainty whether they will be effective in  
502 patients with impaired immune systems, and whether they will confer a persistent protection  
503 against new variants of SARS-CoV-2. If the protective effect of the vaccination remains  
504 incomplete, effective antiviral drugs are still needed and could help with early diagnosis of the  
505 disease. Ultimately, in case of new emerging coronavirus pandemics (77), the availability of such  
506 treatments would constitute a powerful anti-viral arsenal to be used in pandemic preparedness.

507

## 508 MATERIALS AND METHODS

### 509 Enzymatic PC-inhibition by BOS-inhibitors

510 Biochemical assay: The proprotein convertases Furin (108-574-Tev-Flag-6His), PC5A (PCSK5;  
511 115-63-Tev-Flag-6His), PACE4 (PCSK6; 150-693-Tev-Flag-6His), and PC7 (PCSK7; 142-634-  
512 Tev-Flag-6His) enzymes were purified from BacMam transduced CHO cells. Reactions were  
513 performed in black 384-well polystyrene low volume plates (Greiner) at a final volume of 10  $\mu$ L.  
514 BOS-inhibitors (BOS-318, BOS-857 and BOS-981) were dissolved in DMSO (1 mM) and serially  
515 diluted 1 to 3 with DMSO through eleven dilutions to provide a final compound concentration  
516 range from 0.00017 to 10  $\mu$ M. 0.05  $\mu$ l of each concentration was transferred to the corresponding  
517 well of an assay plate, and then 5  $\mu$ l of enzyme (Furin, PCSK5, PCSK6, and PCSK7) in assay  
518 buffer (100 mM HEPES pH7.5, 1 mM  $\text{CaCl}_2$  and 0.005% Triton X-100) was added using a  
519 Multidrop Combi (Thermo) to the compound plates to give a final protein concentration of 0.02,  
520 0.5, 2.5, and 1.0 nM respectively. The plates were mixed by inversion and following a 30 min  
521 preincubation of enzyme with compound at room temperature ( $\sim 22^\circ\text{C}$ ), the substrate FAM-  
522 QRVRRRAVGIDK-TAMRA (AnaSpec # 808143, 5  $\mu$ l of a 1, 0.25, 0.20, and 0.5  $\mu$ M solution in  
523 assay buffer for Furin, PCSK5, PCSK6, and PCSK7 respectively) was added using a Multidrop  
524 Combi. The plates were centrifuged at 500 x g for 1 minute and incubated at room temperature for  
525 two hours. Enzyme inhibition was then quantified using an Envision instrument (PerkinElmer).  
526 Data were normalized to maximal inhibition determined by 1  $\mu$ M decanoyl-Arg-Val-Lys-Arg-  
527 chloromethylketone (Calbiochem #344930).

528 Golgi imaging assay: This assay uses an image-based platform to evaluate the intracellular activity  
529 of Furin inhibitors. Reactions were performed in black 384-well, tissue culture-treated, clear  
530 bottom plates (Greiner). Compounds dissolved in DMSO (1.0 mM) were serially three-fold diluted

531 to give a final compound concentration range from 0.00017 to 10  $\mu$ M. Analyses were initiated by  
532 the addition of U2OS cells simultaneously transduced with a BacMam-delivered construct  
533 containing a Golgi-targeting sequence followed by a 12-amino acid Furin/PCSK cleavage site  
534 from Bone Morphogenic Protein 10 (BMP10) and then GFP at the C terminus. The dibasic Furin  
535 cleavage site sequence was flanked by glycine rich linkers (GalNAc-T2-GGGGS-  
536 DSTARRNAKG-GGGGS-GFP). Briefly, frozen cells are thawed in assay media (Dulbecco's  
537 Modified Eagles Medium Nutritional Mixture F-12 (Ham) without phenol red containing 5% FBS)  
538 and diluted to deliver 6000 cells/well (50  $\mu$ l) to the plate using a Multidrop Combi (Thermo). After  
539 a 24-hour incubation period at 37°C, the cells are stained with Cell Mask Deep Red, fixed in  
540 paraformaldehyde and the nuclei stained using Ho33342. The Golgi-targeted GFP forms bright  
541 punctate clusters within the cell. In the absence of a Furin/PCSK inhibitor, the endogenous  
542 protease cleaves GFP from its N-acetylgalactosaminyltransferase-2 Golgi tether, releasing GFP  
543 into the Golgi lumen where fluorescence was diluted below the threshold of assay sensitivity. In  
544 the presence of a cell permeable Furin/PCSK inhibitor, GFP fluorescence increases as intra-Golgi  
545 protease activity was reduced. Cellular GFP intensity was determined by image-based acquisition  
546 (Incell 2200, Perkin Elmer) at 40x magnification with 4 fields measured per well. Multi-scale top  
547 hat segmentation was used to identify the GFP-tagged puncta and to quantitate the average  
548 fluorescence of all puncta on a per cell basis. Cellular toxicity was determined in parallel.

549 Furin and TMPRSS2 fluorogenic assays: Recombinant Furin was purchased from BioLegend  
550 (#719406), human recombinant TRMPSS2 from Cliniscience (ref LS-G57269-100), and the  
551 DABCYLGlu-EDANS labelled peptides encompassing the different cleavage sites (SI Table 1)  
552 were purchased from Genscript. Reactions were performed at room temperature in black 384-well  
553 polystyrene low volume plates (CELLSTAR-Greiner Bio-One # 784476) at a final volume of 15



554  $\mu$ L. The fluorescent peptides were used at 5  $\mu$ M and the reactions were performed in 50 mM Tris  
555 buffer (pH 6.5 or 7.5), 0.2% Triton X-100, 1mM CaCl<sub>2</sub> and Furin was added at a final  
556 concentration of 0.2 to 100 nM. BOS-inhibitors (BOS-318, BOS-857 and BOS-981) were  
557 dissolved in DMSO (1 mM) and serially diluted 1 to 2 with DMSO to provide a final compound  
558 concentration range from 50  $\mu$ M to 0.01 nM with 5% DMSO in the enzymatic assay. For  
559 TMPRSS2, the fluorescent peptides were used at 5  $\mu$ M and the reactions were performed in 50  
560 mM Tris buffer (pH 8), 150 mM NaCl and TMPRSS2 was added at final concentrations of 50 nM.  
561 Cleavage of the synthetic peptides was quantitated by determining the increase of EDANS (493  
562 nM) fluorescence following release of the DABCYL quencher, which was excited at 335 nM using  
563 a Safire 2 Tecan fluorimeter. The fluorescence was followed during 90 min, and the enzymatic  
564 activity was deduced by measurement of the increase of fluorescence during the linear phase of  
565 the reaction. Each reaction was performed in triplicate and the standard deviation was calculated  
566 using Excel-ecart type function ( $\sqrt{\frac{\sum(x-\bar{x})^2}{(n-1)}}$ ).

## 567 **Plasmids**

568 Single tagged (C-terminal V5 tag) or double tagged (N-terminal HA tag and C-terminal V5 tag)  
569 spike-glycoprotein of SARS-CoV-2 (optimized sequence) and its mutants were cloned into the  
570 pIRES2-EGFP vector. Site-directed mutagenesis was achieved using a Quick-Change kit  
571 (Stratagene, CA) according to the manufacturer's instructions. The plasmids pCI-NEO-hACE2  
572 received from DW Lambert (University of Leeds) and pIRES-NEO3-hTMPRSS2 from P Jolicoeur  
573 (IRCM). The  $\Delta$ Env Vpr Luciferase Reporter Vector (pNL4-3.Luc.R-E-) was obtained from Dr.  
574 Nathaniel Landau through the NIH AIDS Reagent Program whereas the pHIV-1NL4-3  $\Delta$ Env-  
575 NanoLuc construct was a kind gift from Dr. P Bieniasz. Plasmids encoding VSV-G, as HIV-1  
576 Env and tat were previously described (78, 79).

## 577 Cell culture and transfection

578 Monolayers of HeLa, HEK293T, HEK293T17, Vero E6 and Calu-3 cells were cultured in 5% CO<sub>2</sub>  
579 at 37°C in Dulbecco's modified Eagle's medium (DMEM; Wisent) supplemented with 10% (v/v)  
580 fetal bovine serum (FBS; Wisent). HEK293T-ACE2(80), a generous gift from Dr. Paul Bieniasz,  
581 were maintained in DMEM containing 10% FBS, 1% nonessential amino acids (NEAA) and 50  
582 µg/ml blasticidin (Invivogen). The cells were transfected with JetPrime transfection reagent  
583 according to the manufacturer's instructions (Polyplus transfection, New York, USA). At 24h post  
584 transfection, the culture media were changed to serum-free and cells incubated for an additional  
585 24h. To establish the HeLa cells stably express human ACE2, transfected cells were selected using  
586 media containing 500 µg/ml of neomycin (G418, Wisent).

587 For knockdown of Furin in HeLa cells, an optimized set of 4 small interfering RNAs (siRNAs;  
588 SMARTPool) targeted against human Furin were purchased from Horizon Discoveries (Perkin  
589 Elmer, Lafayette, LA, USA) and transfections of HeLa cells were carried out using INTERFERin  
590 (PolyPlus) as recommended by the manufacturer.

591 To generate HIV particles pseudotyped with SARS-CoV-2 S, 293T17 cells (600,000 cells plated  
592 in a 6-well vessel) were transfected with 1 µg pNL4-3 Luc.R-E- (or pHIV-1NLΔEnv-NanoLuc)  
593 in the presence or absence of 0.3 µg pIR-2019-nCoV-S V5 plasmids using Lipofectamine-3000  
594 (Life Technologies). In certain experiments, 293T17 cells were treated with BOS-inhibitors at 6 h  
595 post transfection. Pseudovirions expressing the nano- or firefly-luciferase were collected at 24 h  
596 or 48 h post transfection, respectively. Viral supernatants were clarified by centrifugation at 300 x  
597 g, passed through a 0.45-µm pore-size polyvinylidene fluoride (PVDF; Millipore) syringe filter  
598 (Millipore; SLGVR33RS), and aliquots frozen at -80°C. For WB analysis of purified  
599 pseudovirions, viral supernatants were concentrated by ultracentrifugation on a 20% sucrose

600 cushion for 3h at 35,000 RPM; Beckman Coulter OPTIMA XE; Ti70.1 rotor). HIV particles  
601 lacking the SARS-CoV-2 S glycoprotein served as a negative control in all experiments.

### 602 **Cell viability assay using MTT**

603 Cells, seeded in a 96-well plate, the day before, at 10,000 (HEK-293T and Vero E6) or 50,000  
604 (Calu-3) cells, were treated with serial 10-fold dilutions of BOS-inhibitors for up to 48h. Cells  
605 treated with vehicle alone were used as negative control. MTT was subsequently added to the  
606 medium (final concentration: 2.5 mg/ml) and cells were further incubated for 4h at 37 °C. After  
607 removal of the culture media, DMSO was added and absorbance read at 595 nm using a microplate  
608 spectrophotometer. The data from two independent experiments done in triplicates was used to  
609 calculate the CC50 by nonlinear regression using GraphPad Prism V5.0 software.

### 610 **Western blots**

611 The cells were washed with PBS and then lysed using RIPA buffer (1% Triton X-100, 150 mM  
612 NaCl, 5 mM EDTA, and 50 mM Tris, pH 7.5) for 30 min at 4°C. The cell lysates were collected  
613 after centrifugation at 14,000 × g for 10 min. The proteins were separated on 7% tris-glycine or  
614 8% tricine gels by SDS-PAGE and transferred to a PVDF membrane (Perkin Elmer). The proteins  
615 were revealed using a V5-monoclonal antibody (V5-mAb V2660; 1:5000; Invitrogen), ACE2  
616 antibody (rabbit monoclonal ab108252; 1:3,000; Abcam), Actin antibody (rabbit polyclonal  
617 A2066; 1:5,000; Sigma), or HA-HRP antibody (12-013-819; 1:3,500; Roche). The antigen-  
618 antibody complexes were visualized using appropriate HRP conjugated secondary antibodies and  
619 enhanced chemiluminescence kit (ECL; Amersham or Bio-Rad) and normalization was reported  
620 to β-actin. Quantification of immune-bands was performed using Image Lab software (Bio-Rad).

621 For analysis of SARS-CoV-2 S virions or pseudovirions, protein extracts of purified viral  
622 particles and corresponding producing cells (Calu-3 or 293T17, respectively) were resolved on

623 10% tris-glycine gels and immunoblotted for spike, nucleocapsid, HIV-1 Gag p24 or actin using  
624 anti-V5 (for pseudovirion detection; V2660)/anti-S2 (for virion detection; Sino Biologicals;  
625 40590-T62), anti-N (Sino Biologicals; 40143-MM05), anti-p24 (MBS Hybridoma line 31-90-25)  
626 or anti-actin (MP Biomedicals, SKU 08691001), respectively.

### 627 **Glycosidase treatment**

628 30 to 50 µg proteins were digested for 90 min at 37°C with endoglycosidase-H (Endo-H; P0702L)  
629 or endoglycosidase-F (Endo-F; P0705S) as recommended by the manufacturer (New England  
630 Biolabs).

### 631 **Inhibitor treatment**

632 At 24h post transfection, cells were incubated for 6h with two pan-PC inhibitors: the cell permeable  
633 decanoyl-RVKR-chloromethylketone (cmk; 50 mM; 4026850.001; Bachem) or with the cell  
634 surface PC-inhibitor hexa-D-arginine (D6R; 20 µM; 344931; EMD). Culture media were then  
635 replaced with fresh ones containing the inhibitors for an additional 24h. For the selective cell-  
636 permeable Furin-like inhibitors (BOS; Boston Pharmaceuticals), the cells were treated with the  
637 inhibitors at the specified concentration starting at 5h pre-transfection and throughout the duration  
638 of the experiment.

### 639 **Cell-to-cell fusion assay**

640 HeLa or HeLa TZM-bl cells were plated at 200,000 cells in 12-well plates. HeLa cells were  
641 transiently transfected with different constructs of SARS-CoV-2 spike or NL4.3-HIV Env, or an  
642 empty vector and 0.2 µg of CMV-Tat plasmid. HeLa TZM-bl cells were transfected with human  
643 ACE2, TMPRSS2 or a combination of both. At 6h post-transfection, media were replaced with  
644 fresh ones containing Furin-inhibitors, and 24h later the cells were detached with PBS-EDTA (1  
645 µM). Different combinations of HeLa and HeLa-TZM-bl cells were placed in co-culture plate at a

646 ratio of 1:1 for a total of 60,000 cells/well of a 96 well plate. After 18-24h the media were removed  
647 and 50  $\mu$ l of cell lysis reagent was added in each well. 20  $\mu$ l of the cell lysate was used for luciferase  
648 reading using 50  $\mu$ l of Renilla luciferase reagent (Promega, Madison, WI, USA). Relative light  
649 units (RLU) were measured using a Promega GLOMAX plate reader (Promega, Madison, WI,  
650 USA) and values were reported as fold increase over the RLU measured in co-culture of HeLa  
651 cells transfected an empty vector (V) with respective TZM-bl cells.

### 652 **Protein immunoprecipitation from co-culture media**

653 When indicated, a secreted form of double tagged spike-glycoprotein of SARS-CoV-2 (N-terminal  
654 HA tag and C-terminal V5 tag) from media of co-cultured HeLa and HeLa-TZM-bl cells was  
655 analyzed by immunoprecipitation. Namely, 0.3 ml of media were precipitated with 25  $\mu$ l EZ view  
656 Red anti-HA affinity gel (E 6779; Sigma-Aldrich) according to the manufacturers' protocol. Upon  
657 SDS-PAGE separation and PVDF transfer, the proteins were detected using an HA-HRP antibody  
658 (12-013-819; 1:3,500; Roche).

### 659 **Microscopy**

660 In our luciferase assay, cell co-cultures were plated on glass coverslips. After 18-24h, the cells  
661 were incubated with 488 CellMask™ to stain the membrane and then fixed with 4% PFA for 15  
662 min at 4°C. The glass coverslips were mounted on glass slides using ProLong™ Gold Antifade  
663 containing DAPI (Invitrogen). The number of syncytia were counted over 10 fields.

### 664 **Immunofluorescence**

665 Cell culture and transfection were performed on glass coverslips. Cells were washed twice with  
666 PBS and fixed with fresh 4% paraformaldehyde for 10 min at room temperature. Following  
667 washes, cells were either non-permeabilized or permeabilized with 0.2% Triton X-100 in PBS  
668 containing 2% BSA for 5 min, washed, and then blocking was performed with PBS containing 2%

669 BSA for 1h. Cells were incubated with primary antibodies overnight at 4°C using an antibody  
670 against V5 (mouse monoclonal R960-25; 1:1000; Invitrogen), spike (mouse monoclonal  
671 GTX632604; 1:500; GeneTex) and ACE2 (goat polyclonal AF933; 1:500; R&D Systems).  
672 Following wash, corresponding species-specific Alexa-Fluor (488 or 555)-tagged antibodies  
673 (Molecular Probes) were incubated for 1h at room temperature. Coverslips were mounted on a  
674 glass slide using ProLong Gold Reagent with DAPI (P36935, Life Technologies). Samples were  
675 visualized using a confocal laser-scanning microscope (LSM710, Carl Zeiss) with Plan-  
676 Apochromat 63x/1.40 Oil DIC M27 objective on ZEN software.

### 677 **Pseudovirus entry**

678 HEK293T-ACE2 or Calu-3 (10,000 cells/well plated in a 96-well dish 24 or 48h before,  
679 respectively) were incubated with up to 200  $\mu$ l filtered pseudovirions for overnight. In certain  
680 experiments, target cells were pretreated with BOS-318 (1  $\mu$ M) for 6h and/or Camostat (40  $\mu$ M)  
681 for 2h before transduction. The overnight incubation with pseudovirions was performed in the  
682 presence of the inhibitors. Viral inoculum was removed, then fresh media were added, and the  
683 cells cultured for up to 72h. Upon removal of spent media, 293T-ACE2 and Calu-3 cells were  
684 gently washed twice with PBS and analyzed for firefly- or nano- luciferase activity, respectively  
685 using Promega luciferase assay (Cat # E1501) or Nano-Glo luciferase system (Cat # N1110),  
686 respectively.

### 687 **Replication competent SARS-CoV-2 Viruses**

688 SARS-CoV-2, which served as the viral source, was originally isolated from a COVID-19 patient  
689 in Quebec, Canada and was designated as LSPQ1. The clinical isolate was amplified, tittered in  
690 Vero E6 using a plaque assay as detailed below, and the integrity of the S-protein multi-basic  
691 protein convertase site validated by sequencing. All experiments involving infectious SARS-CoV-

692 2 virus were performed in the designated areas of the Biosafety level 3 laboratory (IRCM)  
693 previously approved for SARS-CoV-2 work.

#### 694 **Plaque assay in Vero E6 cells**

695 Vero E6 cells ( $1.2 \times 10^5$  cells/well) were seeded in quadruplicate in 24-well tissue culture plates in  
696 DMEM supplemented with 10% FBS two days before infection. Cells were infected with up to six  
697 ten-fold serial dilutions ( $10^{-2}$ - $10^{-6}$ ) of viral supernatant containing SARS-CoV-2 for 1h at 37°C  
698 (200 µl infection volume). The plates were manually rocked every 15 min during the 1-hour period.  
699 Subsequently, virus was removed, cells were washed and overlaying media (containing 0.6% low  
700 melt agarose in DMEM with 10% FBS) was added and incubated undisturbed for 60-65h at 37°C.  
701 Post incubation, cells were fixed with 4% formaldehyde and stained with 0.25% crystal violet  
702 (prepared in 30% methanol). High quality plaque pictures were taken using a high resolution  
703 DLSR camera (Nikon model: D80, objective: “AF Micro-Nikkor 60mm f/2.8D”). Plaques were  
704 counted manually and in parallel, imaged plaque plates were processed and plaques enumerated  
705 using an automated algorithm based Matlab software. Virus titer is expressed as plaque-forming  
706 units per ml (PFU/ml): (number of plaques x dilution factor of the virus) x 1000 / volume of virus  
707 dilution used for infection (in µl). Multiplicity of infection (MOI) expressed as: MOI = PFU of  
708 virus used for infection / number of cells.

#### 709 **Cell infections with fully replicative SARS-CoV-2**

710 Vero E.6 and Calu-3 cells were seeded in duplicates in 12-well plates ( $2.3 \times 10^5$  cells/well) the day  
711 before. Cells were pre-treated with various concentrations (0.1-1µM) of BOS-inhibitors and  
712 vehicle alone (DMSO) for up to 24h. In certain experiments, Calu-3 were also pre-treated with  
713 Camostat for 1h. Thereafter, the cells were infected with SARS-CoV-2 virus at MOI of 0.001 for  
714 1h (Vero E6) or 0.01 for 3h (Calu-3 cells) in 350 µl of serum-free DMEM at 37°C with occasional

715 manual rocking of plates. Cells plus media only were used as a control. After incubation, virus  
716 was removed, and the cell monolayer was washed twice successively with PBS and serum-free  
717 DMEM. New media (total 1ml) containing the concentrations of BOS-inhibitors was subsequently  
718 added to cells. Cell-free supernatant (250  $\mu$ l) was removed at 12, 24 and 48h post infection. The  
719 drugs were replenished for 1 ml media at 24h post-infection. The virus supernatants were stored  
720 at -80°C until further use. Viral production in the supernatant was quantified using a plaque assay  
721 on Vero E6.1 cells as described above. In certain experiments, viral supernatants were harvested  
722 at the end of infection and purified on a 20% sucrose cushion using ultracentrifugation as described  
723 above. The resulting concentrated virus and corresponding infected cells were analyzed by  
724 Western blotting as appropriate.

725 Quantification and statistical analysis: Virus titers quantified by plaque assay in triplicate were  
726 shown as mean  $\pm$  standard deviation. The results from experiments done with two biological  
727 replicates and two technical replicates in triplicates were used to calculate the IC<sub>50</sub> by nonlinear  
728 regression using GraphPad Prism V5.0 software. The difference between the control cells (virus  
729 with 0.001% DMSO) and the cells treated with BOS-inhibitors were evaluated by Student's t test.  
730 The P values of 0.05 or lower were considered statistically significant (\*,  $p < 0.05$ ; \*\*,  $p < 0.01$ ;  
731 \*\*\*,  $p < 0.001$ ).

732

### 733 **DATA AVAILABILITY**

734 Source data are provided with this paper. The data that support the findings of this study are  
735 preserved at repositories of the Montreal Clinical Research Institute (IRCM), Montreal, QC,  
736 Canada and available from the corresponding authors upon reasonable request.

737



## 738 ACKNOWLEDGEMENTS

739 This work was supported in part by CIHR Foundation grants (NGS: # 148363) and (ÉAC: #  
740 154324), a Canada Research Chairs in Precursor Proteolysis (NGS: # 950-231335), a CIHR  
741 CHAMPS Team Grant # HAL 157986 (NGS and ÉAC), Réseau SIDA maladies infectieuses  
742 COVID-19 initiative (ÉAC and NGS), the European score project and ANR Reacting COVID-19  
743 (ED and BC). The authors thank the Quebec public health laboratory for providing the infectious  
744 isolate LSPQ1 SARS-CoV-2. We thank Paul Bieniasz for the 293T-ACE2 cell line and the pHIV-  
745 1NL4-3ΔEnv-NanoLuc construct. The following reagents were obtained from the NIH AIDS  
746 Reagent Program, Division of AIDS, NIAID, NIH: TZM-bl cells, from John C. Kappes, Xiaoyun  
747 Wu, and Tranzyme, Inc. and HIV-1 pNL4-3 ΔEnv Vpr Luciferase Reporter Vector (pNL4-  
748 3.Luc.R-E-) obtained from Nathaniel Landau. We are thankful to Dominic Filion for developing  
749 the algorithm for image-assisted plaque quantification. JJ is supported by the CIHR Postdoctoral  
750 Fellowship (HIV-435243-73284). We also thank Dr Annik Prat (IRCM) for the design of the  
751 summary model shown in Fig. 7. Finally, we would like to thank Mrs. Habiba Oueslati and Brigitte  
752 Mary for their excellent editorial help and organization of the manuscript.

## 753 AUTHOR CONTRIBUTIONS

754 RE made all the original critical experiments revealing the role of the PCs in spike processing and  
755 the effect of their inhibitors. JJ performed all the cell assays with infectious SARS-CoV-2. DSR  
756 participated in the biochemical characterizations of TMPRSS2 processing of ACE2 and S1. UA  
757 performed all cell-to-cell fusion assays. AE made all the mutants used in the work. RMD generated  
758 the HeLa-ACE2 cells and prepared all the cells for *ex vivo* analyses. DNH performed all the  
759 immunocytochemical experiments. FD and ML performed experiments related to SARS-CoV-2  
760 pseudovirions. AD and PSO performed all the Furin and TMPRSS2 *in vitro* kinetic cleavage  
761 analyses of peptides mimicking the S1/S2 and S2' sites. CM and KW provided the BOS-inhibitors

762 and their characterization. ED made seminal contributions to the possible role of Furin-like  
763 enzymes in the processing of the spike-glycoprotein and actively contributed to the  
764 conceptualization and writing of the manuscript. TNQP designed, performed, and analyzed  
765 experiments related to viral entry and contributed to the writing of the manuscript. EAC (virology)  
766 and NGS (biochemistry and cell biology) conceptualized the research program and provided the  
767 intellectual contributions and funding for the whole project. All authors actively contributed to the  
768 final version of the manuscript.

769

770 **REFERENCES**

- 771
- 772 1. Dobson AP, Carper ER. 1996. Infectious Diseases and Human Population History:  
773 Throughout history the establishment of disease has been a side effect of the growth of  
774 civilization. *Bioscience* 46:115-126.
- 775 2. Cui J, Li F, Shi ZL. 2019. Origin and evolution of pathogenic coronaviruses. *Nat Rev*  
776 *Microbiol* 17:181-192.
- 777 3. Almeida JD, Tyrrell DA. 1967. The morphology of three previously uncharacterized  
778 human respiratory viruses that grow in organ culture. *J Gen Virol* 1:175-8.
- 779 4. Belouzard S, Millet JK, Licitra BN, Whittaker GR. 2012. Mechanisms of coronavirus cell  
780 entry mediated by the viral spike protein. *Viruses* 4:1011-33.
- 781 5. Liu PP, Blet A, Smyth D, Li H. 2020. The Science Underlying COVID-19: Implications  
782 for the Cardiovascular System. *Circulation* 142:68-78.
- 783 6. Usul Afsar C. 2020. 2019-nCoV-SARS-CoV-2 (COVID-19) infection: Cruciality of Furn  
784 and relevance with cancer. *Med Hypotheses* 140:109770.
- 785 7. Braun E, Sauter D. 2019. Furin-mediated protein processing in infectious diseases and  
786 cancer. *Clin Transl Immunology* 8:e1073.
- 787 8. Izaguirre G. 2019. The Proteolytic Regulation of Virus Cell Entry by Furin and Other  
788 Proprotein Convertases. *Viruses* 11.
- 789 9. Seidah NG, Pasquato A, Andreo U. 2021. How Do Enveloped Viruses Exploit the  
790 Secretory Proprotein Convertases to Regulate Infectivity and Spread? *Viruses* 13:1229.
- 791 10. Coutard B, Valle C, de Lamballerie X, Canard B, Seidah NG, Decroly E. 2020. The spike  
792 glycoprotein of the new coronavirus 2019-nCoV contains a furin-like cleavage site absent  
793 in CoV of the same clade. *Antiviral Res* 176:104742.

- 794 11. Tang T, Bidon M, Jaimes JA, Whittaker GR, Daniel S. 2020. Coronavirus membrane  
795 fusion mechanism offers as a potential target for antiviral development. *Antiviral Res*  
796 doi:10.1016/j.antiviral.2020.104792:104792.
- 797 12. Hoffmann M, Kleine-Weber H, Pöhlmann S. 2020. A Multibasic Cleavage Site in the Spike  
798 Protein of SARS-CoV-2 Is Essential for Infection of Human Lung Cells. *Mol Cell* 78:779-  
799 784.e5.
- 800 13. Lan J, Ge J, Yu J, Shan S, Zhou H, Fan S, Zhang Q, Shi X, Wang Q, Zhang L, Wang X.  
801 2020. Structure of the SARS-CoV-2 spike receptor-binding domain bound to the ACE2  
802 receptor. *Nature* 581:215-220.
- 803 14. Lu G, Wang Q, Gao GF. 2015. Bat-to-human: spike features determining 'host jump' of  
804 coronaviruses SARS-CoV, MERS-CoV, and beyond. *Trends Microbiol* 23:468-78.
- 805 15. Millet JK, Whittaker GR. 2018. Physiological and molecular triggers for SARS-CoV  
806 membrane fusion and entry into host cells. *Virology* 517:3-8.
- 807 16. Ou X, Liu Y, Lei X, Li P, Mi D, Ren L, Guo L, Guo R, Chen T, Hu J, Xiang Z, Mu Z,  
808 Chen X, Chen J, Hu K, Jin Q, Wang J, Qian Z. 2020. Characterization of spike glycoprotein  
809 of SARS-CoV-2 on virus entry and its immune cross-reactivity with SARS-CoV. *Nat*  
810 *Commun* 11:1620.
- 811 17. Shang J, Wan Y, Luo C, Ye G, Geng Q, Auerbach A, Li F. 2020. Cell entry mechanisms  
812 of SARS-CoV-2. *Proc Natl Acad Sci U S A* 117:11727-11734.
- 813 18. Bestle D, Heindl MR, Limburg H, Van Lam van T, Pilgram O, Moulton H, Stein DA,  
814 Harges K, Eickmann M, Dolnik O, Rohde C, Klenk HD, Garten W, Steinmetzer T,  
815 Böttcher-Friebertshäuser E. 2020. TMPRSS2 and furin are both essential for proteolytic  
816 activation of SARS-CoV-2 in human airway cells. *Life Sci Alliance* 3.

- 817 19. Mykytyn AZ, Breugem TI, Riesebosch S, Schipper D, van den Doel PB, Rottier RJ,  
818 Lamers MM, Haagmans BL. 2021. SARS-CoV-2 entry into human airway organoids is  
819 serine protease-mediated and facilitated by the multibasic cleavage site. *Elife* 10.
- 820 20. Seidah NG, Prat A. 2012. The biology and therapeutic targeting of the proprotein  
821 convertases. *Nat Rev Drug Discov* 11:367-383.
- 822 21. Van de Ven WJ, Creemers JW, Roebroek AJ. 1991. Furin: the prototype mammalian  
823 subtilisin-like proprotein-processing enzyme. Endoproteolytic cleavage at paired basic  
824 residues of proproteins of the eukaryotic secretory pathway. *Enzyme* 45:257-270.
- 825 22. Moulard M, Decroly E. 2000. Maturation of HIV envelope glycoprotein precursors by  
826 cellular endoproteases. *Biochim Biophys Acta* 1469:121-132.
- 827 23. Millet JK, Whittaker GR. 2015. Host cell proteases: Critical determinants of coronavirus  
828 tropism and pathogenesis. *Virus Res* 202:120-34.
- 829 24. Hoffmann M, Kleine-Weber H, Schroeder S, Kruger N, Herrler T, Erichsen S, Schiergens  
830 TS, Herrler G, Wu NH, Nitsche A, Muller MA, Drosten C, Pohlmann S. 2020. SARS-  
831 CoV-2 Cell Entry Depends on ACE2 and TMPRSS2 and Is Blocked by a Clinically Proven  
832 Protease Inhibitor. *Cell* 181:271-280.e8.
- 833 25. Xia S, Lan Q, Su S, Wang X, Xu W, Liu Z, Zhu Y, Wang Q, Lu L, Jiang S. 2020. The role  
834 of furin cleavage site in SARS-CoV-2 spike protein-mediated membrane fusion in the  
835 presence or absence of trypsin. *Signal Transduct Target Ther* 5:92.
- 836 26. Johnson BA, Xie X, Bailey AL, Kalveram B, Lokugamage KG, Muruato A, Zou J, Zhang  
837 X, Juelich T, Smith JK, Zhang L, Bopp N, Schindewolf C, Vu M, Vanderheiden A, Winkler  
838 ES, Swetnam D, Plante JA, Aguilar P, Plante KS, Popov V, Lee B, Weaver SC, Suthar  
839 MS, Routh AL, Ren P, Ku Z, An Z, Debbink K, Diamond MS, Shi PY, Freiberg AN,

- 840 Menachery VD. 2021. Loss of furin cleavage site attenuates SARS-CoV-2 pathogenesis.  
841 Nature doi:10.1038/s41586-021-03237-4.
- 842 27. Peacock TP, Goldhill DH, Zhou J, Baillon L, Frise R, Swann OC, Kugathasan R, Penn R,  
843 Brown JC, Sanchez-David RY, Braga L, Williamson MK, Hassard JA, Staller E, Hanley  
844 B, Osborn M, Giacca M, Davidson AD, Matthews DA, Barclay WS. 2021. The furin  
845 cleavage site in the SARS-CoV-2 spike protein is required for transmission in ferrets. Nat  
846 Microbiol doi:10.1038/s41564-021-00908-w.
- 847 28. Johnson BA, Xie X, Bailey AL, Kalveram B, Lokugamage KG, Muruato A, Zou J, Zhang  
848 X, Juelich T, Smith JK, Zhang L, Bopp N, Schindewolf C, Vu M, Vanderheiden A, Winkler  
849 ES, Swetnam D, Plante JA, Aguilar P, Plante KS, Popov V, Lee B, Weaver SC, Suthar  
850 MS, Routh AL, Ren P, Ku Z, An Z, Debbink K, Diamond MS, Shi PY, Freiberg AN,  
851 Menachery VD. 2021. Loss of furin cleavage site attenuates SARS-CoV-2 pathogenesis.  
852 Nature 591:293-299.
- 853 29. Afar DE, Vivanco I, Hubert RS, Kuo J, Chen E, Saffran DC, Raitano AB, Jakobovits A.  
854 2001. Catalytic cleavage of the androgen-regulated TMPRSS2 protease results in its  
855 secretion by prostate and prostate cancer epithelia. Cancer Res 61:1686-92.
- 856 30. Shrimp JH, Kales SC, Sanderson PE, Simeonov A, Shen M, Hall MD. 2020. An Enzymatic  
857 TMPRSS2 Assay for Assessment of Clinical Candidates and Discovery of Inhibitors as  
858 Potential Treatment of COVID-19. bioRxiv doi:10.1101/2020.06.23.167544.
- 859 31. Kawase M, Shirato K, van der Hoek L, Taguchi F, Matsuyama S. 2012. Simultaneous  
860 treatment of human bronchial epithelial cells with serine and cysteine protease inhibitors  
861 prevents severe acute respiratory syndrome coronavirus entry. J Virol 86:6537-45.

- 862 32. Nimishakavi S, Raymond WW, Gruenert DC, Caughey GH. 2015. Divergent Inhibitor  
863 Susceptibility among Airway Lumen-Accessible Tryptic Proteases. *PLoS One*  
864 10:e0141169.
- 865 33. Hörnich BF, Großkopf AK, Schlagowski S, Tenbusch M, Kleine-Weber H, Neipel F,  
866 Stahl-Hennig C, Hahn AS. 2021. SARS-CoV-2 and SARS-CoV spike-mediated cell-cell  
867 fusion differ in the requirements for receptor expression and proteolytic activation. *J Virol*  
868 doi:10.1128/jvi.00002-21.
- 869 34. Cyranoski D. 2020. Profile of a killer: the complex biology powering the coronavirus  
870 pandemic. *Nature* 581:22-26.
- 871 35. Matoba Y, Aoki Y, Tanaka S, Yahagi K, Katsushima Y, Katsushima F, Sugawara K,  
872 Matsuzaki Y, Mizuta K. 2016. HeLa-ACE2-TMPRSS2 Cells Are Useful for the Isolation  
873 of Human Coronavirus 229E. *Jpn J Infect Dis* 69:452-4.
- 874 36. Thomas G. 2002. Furin at the cutting edge: from protein traffic to embryogenesis and  
875 disease. *Nature Reviews Molecular Cell Biology* 3:753-766.
- 876 37. Örd M, Faustova I, Loog M. 2020. Biochemical evidence of furin specificity and potential  
877 for phospho-regulation at Spike protein S1/S2 cleavage site in SARS-CoV2 but not in  
878 SARS-CoV1 or MERS-CoV. *bioRxiv*  
879 doi:10.1101/2020.06.23.166900:2020.06.23.166900.
- 880 38. Andersen KG, Rambaut A, Lipkin WI, Holmes EC, Garry RF. 2020. The proximal origin  
881 of SARS-CoV-2. *Nat Med* 26:450-452.
- 882 39. Schjoldager KT, Clausen H. 2012. Site-specific protein O-glycosylation modulates  
883 proprotein processing - deciphering specific functions of the large polypeptide GalNAc-  
884 transferase gene family. *Biochim Biophys Acta* 1820:2079-2094.

- 885 40. Benton DJ, Wrobel AG, Xu P, Roustan C, Martin SR, Rosenthal PB, Skehel JJ, Gamblin  
886 SJ. 2020. Receptor binding and priming of the spike protein of SARS-CoV-2 for membrane  
887 fusion. *Nature* 588:327-330.
- 888 41. Belouzard S, Chu VC, Whittaker GR. 2009. Activation of the SARS coronavirus spike  
889 protein via sequential proteolytic cleavage at two distinct sites. *Proc Natl Acad Sci U S A*  
890 106:5871-6.
- 891 42. Hallenberger S, Bosch V, Angliker H, Shaw E, Klenk HD, Garten W. 1992. Inhibition of  
892 furin-mediated cleavage activation of HIV-1 glycoprotein gp160. *Nature* 360:358-361.
- 893 43. Susan-Resiga D, Essalmani R, Hamelin J, Asselin MC, Benjannet S, Chamberland A, Day  
894 R, Szumska D, Constam D, Bhattacharya S, Prat A, Seidah NG. 2011. Furin Is the Major  
895 Processing Enzyme of the Cardiac-specific Growth Factor Bone Morphogenetic Protein  
896 10. *J Biol Chem* 286:22785-22794.
- 897 44. Cheng YW, Chao TL, Li CL, Chiu MF, Kao HC, Wang SH, Pang YH, Lin CH, Tsai YM,  
898 Lee WH, Tao MH, Ho TC, Wu PY, Jang LT, Chen PJ, Chang SY, Yeh SH. 2020. Furin  
899 Inhibitors Block SARS-CoV-2 Spike Protein Cleavage to Suppress Virus Production and  
900 Cytopathic Effects. *Cell Rep* 33:108254.
- 901 45. Walls AC, Park YJ, Tortorici MA, Wall A, McGuire AT, Velesler D. 2020. Structure,  
902 Function, and Antigenicity of the SARS-CoV-2 Spike Glycoprotein. *Cell* 181:281-292.e6.
- 903 46. Hoffmann M, Mösbauer K, Hofmann-Winkler H, Kaul A, Kleine-Weber H, Krüger N,  
904 Gassen NC, Müller MA, Drosten C, Pöhlmann S. 2020. Chloroquine does not inhibit  
905 infection of human lung cells with SARS-CoV-2. *Nature* 585:588-590.
- 906 47. Vincent MJ, Bergeron E, Benjannet S, Erickson BR, Rollin PE, Ksiazek TG, Seidah NG,  
907 Nichol ST. 2005. Chloroquine is a potent inhibitor of SARS coronavirus infection and  
908 spread. *Virol J* 2:69.



- 909 48. Bayati A, Kumar R, Francis V, McPherson PS. 2021. SARS-CoV-2 infects cells following  
910 viral entry via clathrin-mediated endocytosis. *J Biol Chem* 296:100306.
- 911 49. Platt EJ, Wehrly K, Kuhmann SE, Chesebro B, Kabat D. 1998. Effects of CCR5 and CD4  
912 cell surface concentrations on infections by macrophagetropic isolates of human  
913 immunodeficiency virus type 1. *J Virol* 72:2855-64.
- 914 50. Plante JA, Mitchell BM, Plante KS, Debbink K, Weaver SC, Menachery VD. 2021. The  
915 variant gambit: COVID-19's next move. *Cell Host Microbe* 29:508-515.
- 916 51. Peacock TP, Penrice-Randal R, Hiscox JA, Barclay WS. 2021. SARS-CoV-2 one year on:  
917 evidence for ongoing viral adaptation. *J Gen Virol* 102.
- 918 52. Rajah MM, Hubert M, Bishop E, Saunders N, Robinot R, Grzelak L, Planas D, Dufloo J,  
919 Gellenoncourt S, Bongers A, Zivaljic M, Planchais C, Guivel-Benhassine F, Porrot F,  
920 Mouquet H, Chakrabarti LA, Buchrieser J, Schwartz O. 2021. SARS-CoV-2 Alpha, Beta,  
921 and Delta variants display enhanced Spike-mediated syncytia formation. *EMBO J*  
922 doi:10.15252/emj.2021108944:e108944.
- 923 53. Matsuyama S, Nagata N, Shirato K, Kawase M, Takeda M, Taguchi F. 2010. Efficient  
924 activation of the severe acute respiratory syndrome coronavirus spike protein by the  
925 transmembrane protease TMPRSS2. *J Virol* 84:12658-64.
- 926 54. Heurich A, Hofmann-Winkler H, Gierer S, Liepold T, Jahn O, Pöhlmann S. 2014.  
927 TMPRSS2 and ADAM17 cleave ACE2 differentially and only proteolysis by TMPRSS2  
928 augments entry driven by the severe acute respiratory syndrome coronavirus spike protein.  
929 *J Virol* 88:1293-307.
- 930 55. Monteil V, Kwon H, Prado P, Hagelkrüys A, Wimmer RA, Stahl M, Leopoldi A, Garreta  
931 E, Hurtado Del Pozo C, Prosper F, Romero JP, Wirnsberger G, Zhang H, Slutsky AS,  
932 Conder R, Montserrat N, Mirazimi A, Penninger JM. 2020. Inhibition of SARS-CoV-2

- 933 Infections in Engineered Human Tissues Using Clinical-Grade Soluble Human ACE2. *Cell*  
934 181:905-913.e7.
- 935 56. Hoffmann M, Mösbauer K, Hofmann-Winkler H, Kaul A, Kleine-Weber H, Krüger N,  
936 Gassen NC, Müller MA, Drosten C, Pöhlmann S. 2020. Chloroquine does not inhibit  
937 infection of human lung cells with SARS-CoV-2. *Nature* doi:10.1038/s41586-020-2575-3.
- 938 57. Bellamine A, Pham TNQ, Jain J, Wilson J, Sahin K, Dallaire F, Seidah NG, Durkee S,  
939 Radošević K, Cohen É A. 2021. L-Carnitine Tartrate Downregulates the ACE2 Receptor  
940 and Limits SARS-CoV-2 Infection. *Nutrients* 13.
- 941 58. Padmanabhan P, Desikan R, Dixit NM. 2020. Targeting TMPRSS2 and Cathepsin B/L  
942 together may be synergistic against SARS-CoV-2 infection. *PLoS Comput Biol*  
943 16:e1008461.
- 944 59. Papa G, Mallery DL, Albecka A, Welch LG, Cattin-Ortolá J, Luptak J, Paul D, McMahon  
945 HT, Goodfellow IG, Carter A, Munro S, James LC. 2021. Furin cleavage of SARS-CoV-  
946 2 Spike promotes but is not essential for infection and cell-cell fusion. *PLoS Pathog*  
947 17:e1009246.
- 948 60. Altulea D, Maassen S, Baranov MV, van den Bogaart G. 2021. What makes  
949 (hydroxy)chloroquine ineffective against COVID-19: insights from cell biology. *J Mol*  
950 *Cell Biol* doi:10.1093/jmcb/mjab016.
- 951 61. Self WH, Semler MW, Leither LM, Casey JD, Angus DC, Brower RG, Chang SY, Collins  
952 SP, Eppensteiner JC, Filbin MR, Files DC, Gibbs KW, Ginde AA, Gong MN, Harrell FE,  
953 Jr, Hayden DL, Hough CL, Johnson NJ, Khan A, Lindsell CJ, Matthay MA, Moss M, Park  
954 PK, Rice TW, Robinson BRH, Schoenfeld DA, Shapiro NI, Steingrub JS, Ulysse CA,  
955 Weissman A, Yealy DM, Thompson BT, Brown SM, National Heart L, Network BIPCT.

- 956 2020. Effect of Hydroxychloroquine on Clinical Status at 14 Days in Hospitalized Patients  
957 With COVID-19: A Randomized Clinical Trial. *JAMA* 324:2165-2176.
- 958 62. Rosenke K, Jarvis MA, Feldmann F, Schwarz B, Okumura A, Lovaglio J, Saturday G,  
959 Hanley PW, Meade-White K, Williamson BN, Hansen F, Perez-Perez L, Leventhal S,  
960 Tang-Huau TL, Callison J, Haddock E, Stromberg KA, Scott D, Sewell G, Bosio CM,  
961 Hawman D, de Wit E, Feldmann H. 2020. Hydroxychloroquine prophylaxis and treatment  
962 is ineffective in macaque and hamster SARS-CoV-2 disease models. *JCI Insight* 5.
- 963 63. Glowacka I, Bertram S, Müller MA, Allen P, Soilleux E, Pfefferle S, Steffen I, Tsegaye  
964 TS, He Y, Gnirss K, Niemeyer D, Schneider H, Drosten C, Pöhlmann S. 2011. Evidence  
965 that TMPRSS2 activates the severe acute respiratory syndrome coronavirus spike protein  
966 for membrane fusion and reduces viral control by the humoral immune response. *J Virol*  
967 85:4122-34.
- 968 64. Raghuvamsi PV, Tulsian NK, Samsudin F, Qian X, Purushotorman K, Yue G, Kozma MM,  
969 Hwa WY, Lescar J, Bond PJ, MacAry PA, Anand GS. 2021. SARS-CoV-2 S protein:ACE2  
970 interaction reveals novel allosteric targets. *Elife* 10.
- 971 65. Zhang H, Wada J, Hida K, Tsuchiyama Y, Hiragushi K, Shikata K, Wang H, Lin S, Kanwar  
972 YS, Makino H. 2001. Collectrin, a collecting duct-specific transmembrane glycoprotein, is  
973 a novel homolog of ACE2 and is developmentally regulated in embryonic kidneys. *J Biol*  
974 *Chem* 276:17132-9.
- 975 66. Yan R, Zhang Y, Li Y, Xia L, Guo Y, Zhou Q. 2020. Structural basis for the recognition  
976 of SARS-CoV-2 by full-length human ACE2. *Science* 367:1444-1448.
- 977 67. Yamamoto M, Kiso M, Sakai-Tagawa Y, Iwatsuki-Horimoto K, Imai M, Takeda M,  
978 Kinoshita N, Ohmagari N, Gohda J, Semba K, Matsuda Z, Kawaguchi Y, Kawaoka Y,  
979 Inoue JI. 2020. The Anticoagulant Nafamostat Potently Inhibits SARS-CoV-2 S Protein-

- 980 Mediated Fusion in a Cell Fusion Assay System and Viral Infection In Vitro in a Cell-  
981 Type-Dependent Manner. *Viruses* 12.
- 982 68. Koch J, Uckeley ZM, Doldan P, Stanifer M, Boulant S, Lozach PY. 2021. TMPRSS2  
983 expression dictates the entry route used by SARS-CoV-2 to infect host cells. *EMBO J*  
984 40:e107821.
- 985 69. Wölfel R, Corman VM, Guggemos W, Seilmaier M, Zange S, Müller MA, Niemeyer D,  
986 Jones TC, Vollmar P, Rothe C, Hoelscher M, Bleicker T, Brünink S, Schneider J, Ehmann  
987 R, Zwirgmaier K, Drosten C, Wendtner C. 2020. Virological assessment of hospitalized  
988 patients with COVID-2019. *Nature* 581:465-469.
- 989 70. Zhou L, Niu Z, Jiang X, Zhang Z, Zheng Y, Wang Z, Zhu Y, Gao L, Huang H, Wang X,  
990 Sun Q. 2020. The SARS-CoV-2 targets by the pscRNA profiling of ACE2, TMPRSS2 and  
991 Furin proteases. *iScience* doi:10.1016/j.isci.2020.101744:101744.
- 992 71. Mayer G, Boileau G, Bendayan M. 2004. Sorting of furin in polarized epithelial and  
993 endothelial cells: expression beyond the Golgi apparatus. *J Histochem Cytochem* 52:567-  
994 580.
- 995 72. Antalis TM, Bugge TH, Wu Q. 2011. Membrane-anchored serine proteases in health and  
996 disease. *Prog Mol Biol Transl Sci* 99:1-50.
- 997 73. Chu H, Chan JF, Yuen TT, Shuai H, Yuan S, Wang Y, Hu B, Yip CC, Tsang JO, Huang  
998 X, Chai Y, Yang D, Hou Y, Chik KK, Zhang X, Fung AY, Tsoi HW, Cai JP, Chan WM,  
999 Ip JD, Chu AW, Zhou J, Lung DC, Kok KH, To KK, Tsang OT, Chan KH, Yuen KY.  
1000 2020. Comparative tropism, replication kinetics, and cell damage profiling of SARS-CoV-  
1001 2 and SARS-CoV with implications for clinical manifestations, transmissibility, and  
1002 laboratory studies of COVID-19: an observational study. *Lancet Microbe* 1:e14-e23.

- 1003 74. Gunst JD, Staerke NB, Pahus MH, Kristensen LH, Bodilsen J, Lohse N, Dalgaard LS,  
1004 Brønnum D, Frøbert O, Hønge B, Johansen IS, Monrad I, Erikstrup C, Rosendal R, Vilstrup  
1005 E, Mariager T, Bove DG, Offersen R, Shakar S, Cajander S, Jørgensen NP, Sritharan SS,  
1006 Breining P, Jespersen S, Mortensen KL, Jensen ML, Kolte L, Frattari GS, Larsen CS,  
1007 Storgaard M, Nielsen LP, Tolstrup M, Sædder EA, Østergaard LJ, Ngo HTT, Jensen MH,  
1008 Højen JF, Kjolby M, Søgaard OS. 2021. Efficacy of the TMPRSS2 inhibitor camostat  
1009 mesilate in patients hospitalized with Covid-19-a double-blind randomized controlled trial.  
1010 *EClinicalMedicine* 35:100849.
- 1011 75. Shapira T, Monreal IA, Dion SP, Jager M, Désilets A, Olmstead AD, Vandal T, Buchholz  
1012 DW, Imbiakha B, Gao G, Chin A, Rees WD, Steiner T, Nabi IR, Marsault E, Sahler J,  
1013 August A, Van de Walle G, Whittaker GR, Boudreault PL, Aguilar HC, Leduc R, Jean F.  
1014 2021. A novel highly potent inhibitor of TMPRSS2-like proteases blocks SARS-CoV-2  
1015 variants of concern and is broadly protective against infection and mortality in mice.  
1016 [bioRxiv doi:10.1101/2021.05.03.442520](https://doi.org/10.1101/2021.05.03.442520).
- 1017 76. Ou T, Mou H, Zhang L, Ojha A, Choe H, Farzan M. 2021. Hydroxychloroquine-mediated  
1018 inhibition of SARS-CoV-2 entry is attenuated by TMPRSS2. *PLoS Pathog* 17:e1009212.
- 1019 77. Morens DM, Fauci AS. 2020. Emerging Pandemic Diseases: How We Got to COVID-19.  
1020 *Cell* 183:837.
- 1021 78. Lodge R, Lalonde JP, Lemay G, Cohen EA. 1997. The membrane-proximal  
1022 intracytoplasmic tyrosine residue of HIV-1 envelope glycoprotein is critical for basolateral  
1023 targeting of viral budding in MDCK cells. *EMBO J* 16:695-705.
- 1024 79. Forget J, Yao XJ, Mercier J, Cohen EA. 1998. Human immunodeficiency virus type 1 vpr  
1025 protein transactivation function: mechanism and identification of domains involved. *J Mol*  
1026 *Biol* 284:915-23.

1027 80. Schmidt F, Weisblum Y, Muecksch F, Hoffmann HH, Michailidis E, Lorenzi JCC,  
1028 Mendoza P, Rutkowska M, Bednarski E, Gaebler C, Agudelo M, Cho A, Wang Z,  
1029 Gazumyan A, Cipolla M, Caskey M, Robbiani DF, Nussenzweig MC, Rice CM,  
1030 Hatzioannou T, Bieniasz PD. 2020. Measuring SARS-CoV-2 neutralizing antibody  
1031 activity using pseudotyped and chimeric viruses. *J Exp Med* 217.

1032

1033

## 1034 FIGURE LEGENDS

1035 Figure 1: **Processing of S-peptides by Furin and TMPRSS2.** (A) Schematic representation of  
1036 the primary structure of preproS and its domains and the predicted Furin-like S1/S2 site generating  
1037 the S1- and S2-subunits, as well as the S2' site preceding the fusion peptide (FP). The signal  
1038 peptide (SP), N-terminal domain (NTD), receptor binding domain (RBD) to ACE2, the two heptad  
1039 repeats HR1 and HR2, the transmembrane domain (TM), the cytosolic tail (CT) and the C-terminal  
1040 V5-tag are indicated. (B) *In vitro* Furin activity against peptides mimicking the S1/S2 (and its  
1041 mutants) and S2' cleavage site sequence of the spike protein from SARS-CoV-2 and SARS-CoV-  
1042 1, as described in SI-Table 1. Each substrate was tested at a final protease concentration of 2 and  
1043 100 nM. (C) *In vitro* TMPRSS2 activity (at 50 nM) against peptides mimicking the S1/S2 and S2'  
1044 cleavage site sequence of the spike protein from SARS-CoV-2 (and its mutants) described in SI-  
1045 Table 1.

1046 Figure 2: **Processing of spike-glycoprotein in HeLa cells.** (A) Western blot analyses of the  
1047 processing of WT proS into V5-tagged S2 and S2' by the proprotein convertases Furin, PC5A,  
1048 PACE4 and PC7 following co-transfection of their cDNAs in HeLa cells. The migration positions  
1049 of immature proS<sub>im</sub>, S2 and S2' as well as the actin loading control are emphasized. V = empty  
1050 pIRES-EGFP-V5 vector. (B) Western blot analyses of HeLa cells following co-transfection with  
1051 cDNAs coding for either WT-S-protein or its double Ala-mutant [R685A + R682A] ( $\mu$ S1/S2) in the  
1052 absence or presence of Furin cDNA at a ratio S:protease = 1:2. \*Inconsistently observed oligomeric  
1053 forms of proS. (C) Identification of S2' cleavage site by MS/MS. WT-spike-glycoprotein was  
1054 immunoprecipitated from HeLa cells using V5 agarose beads then resolved by SDS  
1055 electrophoresis SDS/PAGE and subjected to silver staining (left panel); the positions of the slices  
1056 are indicated (1 to 10). The MS/MS analysis of peptides generated by a Lys-specific protease

1057 (K<sub>814</sub>↓) are indicated; the data represent the ratio of SFIEDLLFNK<sub>825</sub> to R<sub>815</sub>SFIEDLLFNK<sub>825</sub>  
1058 (right panel). **(D)** Western blot analyses of HeLa cells co-transfected with V5-tagged spike protein,  
1059 WT (S) or its Furin-optimized S2' (KRRKR<sub>815</sub>↓SF) mutant ( $\mu$ S2'), and empty vector (V) or Furin.  
1060 **(A, B)** The estimated % cleavages into S1/S2 and S2' are shown and were calculated as the ratio  
1061 of the V5-immunoreactivity of the cleaved form to the sum of all forms. The data are representative  
1062 of at least three independent experiments.

1063 **Figure 3: Processing of spike-glycoprotein at S2' is enhanced in presence of ACE2.** Western blot  
1064 showing the impact of ACE2 on the processing of WT and  $\mu$ S1/S2 spike-glycoproteins by Furin.  
1065 HeLa cells expressing empty vector (V), WT proS **(A)** or its  $\mu$ S1/S2 mutant **(B)** without or with  
1066 Furin, ACE2 or both were analysed by Western blotting using anti-V5 antibody. The ratio of cDNAs  
1067 used was S:ACE2:Furin = 1:1:1. The data are representative of at least three independent  
1068 experiments.

1069 **Figure 4: Inhibition of PCs by BOS compounds.** **(A)** Chemical motif of BOS-inhibitors and  
1070 representative structure of BOS-318. **(B)** *In vitro* BOS-inhibition of the cleavage of the fluorogenic  
1071 dibasic substrate FAM-QRVRRAVGIDK-TAMRA by each of the proprotein convertases Furin,  
1072 PC5 (PCSK5), PACE4 (PCSK6) and PC7 (PCSK7). All experiments were performed in 10  
1073 different wells and the average pIC<sub>50</sub> (in nM) was calculated. Shown for comparison is the  
1074 inhibitory pIC<sub>50</sub> of the Furin-like inhibitor RVKR-cmk performed >100 times. **(C)** *In vitro*  
1075 inhibition of Furin by the BOS compounds. Furin (2 nM) was incubated with increasing  
1076 concentration of BOS-inhibitors, and its enzymatic activity against the synthetic peptides  
1077 DABSYL/Glu-TNSPRRAR↓SVAS-EDANS (5  $\mu$ M) was measured at pH 7.5 (n=3). **(D)** Golgi  
1078 assay: table representing the effects of BOS-inhibitors on U2OS cells expressing each of Furin,  
1079 PC5A, PACE4 and PC7 simultaneously transduced with a BacMam-delivered construct



1080 containing a Golgi-targeting sequence followed by a 12-amino acid Furin/PCSK cleavage site  
1081 from Bone Morphogenic Protein 10 (BMP10) and GFP at the C terminus (GalNAc-T2-GGGGS-  
1082 DSTARIRR↓NAKG-GGGGS-GFP). Dibasic cleavage releases NAKG-GGGGS-GFP thereby  
1083 reducing the Golgi-associated fluorescence estimated by imaging. **(E)** Furin-inhibitors (BOS)  
1084 abrogate endogenous processing of the spike-glycoprotein. HeLa cells were transiently transfected  
1085 with a cDNA encoding an empty vector (V) or with one expressing the V5-tagged spike (S)  
1086 glycoprotein (spike-V5). At 5h pre-transfection, cells were treated with vehicle DMSO (NT,  
1087 duplicate) or with the Furin-inhibitors at indicated concentrations, or RVKR-cmk at 50  $\mu$ M. At 24h  
1088 post-transfection media were replaced with fresh ones lacking (NT) or containing the inhibitors for  
1089 an additional 24h. Cell extracts were analyzed by Western blotting using a mAb-V5. All data are  
1090 representative of at least three independent experiments.

1091 **Figure 5: Furin-like inhibitors and Camostat treatment decrease SARS-CoV-2 infection in**  
1092 **Calu-3 Cells.** **(A)** Replication kinetics was studied at 12, 24 and 48h post-infection by plaque  
1093 assay to determine PFUs of SARS-CoV-2 virus in the supernatant of infected Calu-3 cells treated  
1094 or not with 1 $\mu$ M BOS-318, BOS-857 and BOS-981. A line graph represents results of the triplicate  
1095 plaque assay results (mean  $\pm$  SD). **(B)** The virus titers (PFU per milliliter) released in the  
1096 supernatant (24h post-infection) of infected Calu-3 cells treated with indicated concentrations of  
1097 BOS-318 were determined by plaque assay (mean  $\pm$  SD of triplicates, \* $p$  < 0.05; \*\* $p$  < 0.01; \*\*\* $p$   
1098 < 0.001) (left panel). The selectivity index (SI) of BOS-318 in Calu-3 cells as shown in top right  
1099 panel was determined by  $CC_{50}/IC_{50}$ . The left y axis indicates the inhibition of virus titer (percent)  
1100 relative to that of the untreated control group (red). The right y axis indicates the cell viability  
1101 (percent) relative to that of the untreated control group (green). The  $CC_{50}$  (50% cytotoxic  
1102 concentration),  $IC_{50}$  (half maximal inhibitory concentration), and SI (selectivity index) values for

1103 each inhibitor are as shown. Representative plaque images of infected Calu-3 cells treated with  
1104 indicated doses of BOS-inhibitors are shown in the bottom right panel. (C) Immunoblots for the  
1105 infected Calu-3 cells (right panel) and viral particles secreted in the supernatant (left panel) with  
1106 and without treatment with BOS-inhibitors indicate reduced viral protein levels. Immunoblots  
1107 were probed for the full-length (proSm) and cleaved (S2) fragments of viral S protein and  
1108 nucleocapsid (N) protein as indicated;  $\beta$ -Actin was included as the loading control for the cells.  
1109 (D) The virus titers (PFU per milliliter) released in the supernatant (24h post-infection) of infected  
1110 Calu-3 cells treated with BOS-318 and/or Camostat (Camo) were determined by plaque assay  
1111 (mean  $\pm$  SD of duplicates, \*,  $p < 0.05$ ; \*\*,  $p < 0.01$ ; \*\*\*,  $p < 0.001$ ) (top panel). Representative  
1112 plaque images of infected Calu-3 cells are shown in the bottom panel. Color plaques differentiate  
1113 the lawn (one color gray per well) from individual plaques (independent colors).

1114 **Figure 6: Processing of SARS-CoV-2 S by Furin-like convertases and TMPRSS2 is critical**  
1115 **for viral entry in human lung epithelial cells but not in model HEK293 cells stably expressing**  
1116 **ACE2. (A)** Furin cleavage of proS at the S1/S2 site is required for SARS-CoV-2 pseudoviral entry  
1117 in Calu-3 cells but not HEK293T-ACE2 cells. Cells were inoculated with nanoluciferase-  
1118 expressing HIV particles pseudotyped with SARS-CoV-2: wild-type spike (WT), double Ala-  
1119 mutant spike ( $\mu$ S1/S2) or Furin-optimized spike ( $\mu$ S2'). Inhibition of proS processing at S1/S2 by  
1120 a novel Furin-like inhibitor (BOS-318) during pseudovirion packaging prevents viral entry in  
1121 Calu-3 cells but not in HEK293T-ACE2 cells. (B) Western blot analyses show inhibition by BOS-  
1122 318 of proS processing at S1/S2 site. Purified pseudovirions and cellular extracts of producing  
1123 HEK293-T17 cells treated or not with BOS-318 inhibitor were separated on SDS-PAGE gel and  
1124 analyzed for HIV-1 p24 and V5-tagged S-protein (proSm or cleaved, S2) as indicated. (C) Pre-  
1125 treatment of Calu-3 cells with (B) 1  $\mu$ M BOS-318, (C) 100  $\mu$ M Camostat or both (B+C) markedly

1126 reduces viral entry. In Panels A and C, Calu-3 cells were transduced with nanoluciferase-  
1127 expressing HIV particles pseudotyped with SARS-CoV-2 S WT,  $\mu$ S1/S2 or  $\mu$ S2' for 72h and  
1128 analyzed for nano-luciferase expression. Viral entry was expressed as fold increase over that given  
1129 by bald particles (pseudovirions made in the absence of S). In panels A and C each dot represents  
1130 a different experiment with median luciferase activity calculated from three biological replicates.  
1131 Two to four experiments were performed for each cell type. Error bars indicate standard deviation  
1132 (SD) from the mean.

1133 **Figure 7: Spike-induced cell-to-cell fusion relies on Furin cleavage at S1/S2.** (A) Cell-to-cell  
1134 fusion between donor cells (HeLa) expressing the fusogenic SARS-CoV-2 spike protein along  
1135 with the HIV trans-activator Tat, and acceptor cells (TZM-bl) that express ACE2. Upon fusion,  
1136 Tat is transferred from donor to acceptor cells, thereby inducing luciferase expression. (B) Cell-  
1137 to-cell fusion was evaluated using confocal microscopy. A representative immunocytochemistry  
1138 of HeLa cells transfected with a vector expressing SARS-CoV-2 spike co-cultured with TZM-bl  
1139 cells for 18h. The number of syncytia (multiple nuclei) was examined using CellMask™ to probe  
1140 for the plasma membrane and Dapi to stain the nuclei. (C) Donor cells were transfected with  
1141 vectors expressing either no protein (empty vector, V),  $\mu$ S1/S2, or WT-spike (S) in the absence  
1142 (NT) or presence of vehicle (DMSO) or with the Furin-inhibitors BOS-318, BOS-981, BOS-857  
1143 (300 nM) or RVKR (10  $\mu$ M). Acceptor cells were transfected with a vector expressing ACE2.  
1144 After 48h, donor and acceptor cells were co-cultured for 18h. Relative luminescence units (RLU)  
1145 were normalized to the V value arbitrarily set to 1. Data are presented as mean values  $\pm$  SD (n=3),  
1146 One-Way ANOVA, Dunn-Sidak multiple comparison test. (D) Donor HeLa cells expressing WT-  
1147 S or its indicated mutants and variants were co-cultured with acceptor TZM-bl cells expressing  
1148 ACE2. The extent of fusion is represented as a ratio between the RLU measured for each condition

1149 and that of donor cells expressing empty vector. The bar graph represents the average of 3  
1150 experiments performed in triplicates. Data are presented as mean values  $\pm$  SEM (n=3), One-way  
1151 Anova Bonferroni multiple comparison test. Two-Way ANOVA, Dunn-Sidak multiple  
1152 comparison test.

1153 **Figure 8: Spike-glycoprotein processing by Furin and TMPRSS2 in a co-culture system and**  
1154 **their role in cell-to-cell fusion.** Donor HeLa cells expressing empty vector (V), WT-S-HA or  
1155  $\mu$ S1/S2-HA were co-cultured with acceptor TZM-bl cells expressing V, ACE2, or ACE2 +  
1156 TMPRSS2 (TMP). From the same experiment, cell-to-cell fusion (**A**) was assessed in parallel by  
1157 Western blotting of spike-glycoproteins in cells and media using an anti-V5 mAb (**B**). Secreted  
1158 forms of spike protein (S1) in the media were detected with anti HA-HRP upon  
1159 immunoprecipitation with anti-HA agarose. The bar graph shows one representative fusion assay  
1160 done un duplicate. The corresponding Western-blot is representative of three independent  
1161 experiments. Values of S2 and S2' relative to  $\beta$ -actin are shown (nd = too low or not detected).

1162 **Figure 9: Exogenous TMPRSS2-generated shedding of ACE2 differentially regulates S-induced**  
1163 **fusion at the plasma membrane of WT-S versus  $\mu$ AS1/S2.** Donor HeLa cells expressing double  
1164 tagged (N-terminal HA-tag; C-terminal V5-tag) spike-glycoprotein WT (S) or its S1/S2 mutant  
1165 ( $\mu$ AS1/S2) were co-cultured with acceptor TZM-bl cells expressing (empty vector, V), ACE2, or  
1166 ACE2 + TMPRSS2 (TMP) and treated with DMSO (vehicle control) or Camostat (120  $\mu$ M).  
1167 Within the same experiment, cell-to-cell fusion (**A**) was assessed in parallel with spike processing  
1168 in cells and media by Western-blot (**B, C**). (**A**) The extent of fusion is represented as a ratio  
1169 between the RLU measured for each condition and that of donor cells expressing V. The bar graph  
1170 represents the average of 2 experiments performed in triplicates. (**B, C**). Western blot analyses of  
1171 media and cell extracts of the co-cultured cells with donor cells overexpressing double tagged (N-

1172 terminal HA-tag; C-terminal V5-tag) spike-glycoprotein, WT (S) (**B**) or  $\mu$ AS1/S2 (**C**). The arrow  
1173 points to a putative degradation product of S2', that is absent in presence of Camostat. Media were  
1174 subjected to immunoprecipitation with anti-HA agarose for the secreted forms of spike protein (S1,  
1175 S1<sub>L</sub>) followed by Western blotting with anti HA-HRP. In the cell extracts Spike-glycoproteins and  
1176 ACE2 were immunoblotted with anti-V5 mAb and a polyclonal ACE2 antibody, respectively. The  
1177 data are representative of three independent experiments.

1178 **Figure 10: The C-terminal collectrin-like domain of ACE2 may be critical for the regulation**  
1179 **of cell-to-cell fusion of spike-glycoprotein when exogenous TMPRSS2 is present. (A)**

1180 Schematic representation of the primary structure of human ACE2 with emphasis on the C-  
1181 terminal collectrin-like domain (aa 616-768, light gray), TMPRSS2 cleavage region (aa 697-716,  
1182 black) and the polybasic amino-acid segments in which K/R were mutated to A (C0 and C4)  
1183 (amino acids underlined and in bold). Also shown are the peptidase domain (aa 19-615, white)  
1184 containing the regions involved in the interaction with the spike SARS-CoV protein (hatched) and  
1185 transmembrane domain (TM). (**B**) HeLa cells were co-transfected with ACE2, WT (ACE2) or its  
1186 mutant ACE2 (C0+C4), and TMPRSS2, WT (TMPRSS2) or its S441A active-site mutant  
1187 ( $\mu$ TMPRSS2), or empty vector (V). Media and cell extracts were analyzed by western blotting for  
1188 shed ACE2 (sACE2) and ACE2, respectively. The migration positions of the ~95 kDa and ~80  
1189 kDa sACE2 are emphasized. (**C**) Donor HeLa cells expressing WT-S-HA or  $\mu$ AS1/S2-HA were  
1190 co-cultured with acceptor TZM-bl cells expressing ACE2, WT (ACE2) or its mutant ACE2  
1191 (C0+C4) in presence or absence of TMPRSS2. From the same experiment, cell-to-cell fusion was  
1192 assessed (**C**), in parallel with WB analyses of cells and media (**D**). The extent of fusion is  
1193 represented as a ratio between the RLU measured for each condition and that of donor cells  
1194 expressing an empty vector. The bar graph represents the average of 3 experiments performed in  
1195 triplicates. Data are presented as mean values  $\pm$  SD (n=3), One-way Anova Turkey's multiple

1196 comparison test. **(D)** Co-culture media were subjected to immunoprecipitation with anti-HA  
1197 agarose for the secreted forms of spike protein (S1) followed by western blot with anti HA-HRP.  
1198 Spike-glycoproteins in the cell extracts were immunoblotted with anti-V5 mAb. The Western blot  
1199 data are representative of three independent experiments.

1200 Figure 11: **Proposed model for the processing of S-protein and its blockade by Furin and**  
1201 **TMPRSS2 inhibitors.** Boxed left panel: schematic representation of the S-glycoprotein domains  
1202 of SARS-CoV-2, including the N-terminal (NTD) and C-terminal (CTD) domains of S1, the Furin-  
1203 S1/S2 and the Furin/TMPRSS2-S2' processing sites as well as the fusogenic  $\alpha$ -helix that follows  
1204 S2'. Binding of the RBD domain of S1 to the membrane associated ACE2 in target cells, and the  
1205 cell surface expression of TMPRSS2 and Furin are also schematized. Right panels: **(1)** BOS-  
1206 inhibitors (or  $\mu$ S1/S2 mutant) completely prevent cell-to-cell fusion of donor HeLa cells expressing  
1207 S-glycoprotein with acceptor HeLa-ACE2 cells, which lack endogenous TMPRSS2. In this  
1208 context, this reveals that Furin is a major processing enzyme cleaving at S1/S2 and generating S2'.  
1209 **(2)** In acceptor HeLa cells expressing TMPRSS2 (+), maximal prevention of cell-to-cell fusion  
1210 can be achieved by a combination of Furin (BOS, phenocopying the  $\mu$ S1/S2 or  $\mu$ AS1/S2 mutants)  
1211 and TMPRSS2 (Camostat) inhibitors blocks S2' production, ACE2-shedding (sACE2) and the  
1212 separation of sACE2-S1<sub>L</sub> complex from S2. **(3)** Optimal blockade of SARS-CoV-2 infection of  
1213 Calu-3 cells, which express endogenously both Furin and TMPRSS2, is also achieved by a  
1214 combination of Furin (BOS) and TMPRSS2 (Camostat) inhibitors.

1215

1216 **SUPPORTING INFORMATION (SI): TABLE 1; FIGURES 1-7**

1217 **Table 1: Sequences of the different peptides mimicking the Cov spike cleavage sites that have**  
1218 **been tested in the enzymatic assay.** The arrow indicates the expected cleavage site.

1219 **SI-Figure 1: Importance of Furin in the processing of the Spike-glycoprotein.** (A) HeLa cells  
1220 were first transfected with control non-targeting siRNA (siCTL) or siRNA Furin (siFur) at final  
1221 concentrations of 20 nM, or mock transfected (N) and 24h later, transfected with empty vector (V)  
1222 or with that coding for a V5-tagged spike-glycoprotein for an additional 48h. Following lysis,  
1223 proteins were resolved on SDS-PAGE followed by WB with anti-V5 or anti-Furin antibodies. (B)  
1224 HeLa cells transfected with empty vector (V), V5-tagged wild type spike-protein (WT) or its S1/S2  
1225 site mutant ( $\mu$ S1/S2) were treated with Endo-F and Endo-H or mock treated (NT) and analyzed as  
1226 described in panel A. (C, D) HeLa cells transfected with V5-tagged wild type spike-protein (WT)  
1227 or S1/S2 single mutants (C) or S2' single or double mutants (D) in the absence (V) or presence of  
1228 overexpressed Furin were lysed and analyzed by WB.

1229 **SI-Figure 2: Immunocytochemistry of the co-localization of ACE2 and S-protein or  $\mu$ S1/S2-**  
1230 **S in HeLa cells.** Immunofluorescence of S-protein (green), WT (S) or  $\mu$ S1/S2, and ACE2 (red)  
1231 were revealed using the spike S2-antibody GTX632604 in non-permeabilized (NP) conditions or  
1232 anti-V5 in permeabilized (P) conditions, and ACE2 antibody AF933. The confocal co-localizations  
1233 are shown in the merged Figures. Scale bar = 10  $\mu$ m.

1234 **SI-Figure 3: Furin-like inhibitors strongly reduce SARS-CoV-2 infection in Calu-3 cells.**

1235 Calu-3 cells were treated with indicated concentrations of (A) BOS-857 and (B) BOS-981 and  
1236 infected with SARS-CoV-2 for 24h. Virus titers in the supernatant were determined by plaque  
1237 assay on VeroE6 cells (mean plaque forming units [PFU] per ml)  $\pm$  SD of triplicates, \*p <  
1238 0.05; \*\*p < 0.01; \*\*\*p < 0.001). The selectivity index (SI) of (A) BOS-857, and (B) BOS-981 in

1239 Calu-3 cells as shown in top right panel was determined by  $CC_{50}/IC_{50}$ . The left y axis indicates  
1240 the inhibition of virus titer (percent) relative to that of the untreated control group (red). The  
1241 right y axis indicates the cell viability (percent) relative to that of the untreated control group  
1242 (green). Representative plaque images of infected Calu-3 cells treated with indicated doses of  
1243 BOS-inhibitors are shown in the bottom right panel. Color plaques differentiate the lawn (one  
1244 color gray per well) from individual plaques (independent colors).

1245 **SI-Figure 4: Furin-like inhibitors modestly reduce virus production in SARS-CoV-2-infected**  
1246 **Vero E6 cells in a concentration-dependent manner. (A)** Vero E6 cells treated or not with  $1\mu\text{M}$   
1247 BOS-318, BOS-857 or BOS-981 were infected with SARS-CoV-2 for up to 45h. Virus titers in  
1248 the supernatant obtained at 12, 24 and 48 h post infection were determined by plaque assay on  
1249 Vero E6. A line graph represents results of the triplicate plaque assay (mean PFU/ml  $\pm$  SD). **(B,**  
1250 **C, and D)** Virus released in the supernatant (48 hr post infection) of infected Vero E6 cells treated  
1251 with indicated concentrations of (B) BOS-318, (C) BOS-857, or (D) BOS-981 were determined  
1252 by plaque assay (mean  $\pm$  SD of triplicates, \* $p < 0.05$ ; \*\* $p < 0.01$ ; \*\*\* $p < 0.001$ ).

1253 **SI-Figure 5: Combination of BOS-981 and Camostat reduces SARS-CoV-2 replication.** Calu-  
1254 3 cells were treated with BOS-981 and/or Camostat (Camo) and infected with SARS-CoV-2 for  
1255 24h. Virus titers in the supernatant were determined by plaque assay on VeroE6 (mean PFU/ml  $\pm$   
1256 SD of duplicates, \* $p < 0.05$ ). Representative plaque images of infected Calu-3 cells are shown in the  
1257 bottom panel. Color plaques differentiate the lawn (one color gray per well) from individual  
1258 plaques (independent colors).

1259 **SI-Figure 6: Cell-to-cell fusion assay: correlation between syncytia formation and luciferase**  
1260 **activity. (A)** Cell-to-cell fusion between donor cells (HeLa) and acceptor cells (TZM-bl) was  
1261 evaluated using confocal microscopy. HeLa cells transfected with: (a) an empty vector (V), or



1262 expressing (b) HIV-gp160 and Tat, (c) SARS-CoV-2 spike, or (d)  $\mu$ S1/S2 were co-cultured with  
1263 TZM-bl cells for 18h and the number of syncytia was examined using CellMask™ to probe for  
1264 the plasma membrane and Dapi to stain the nuclei. (B) Donor cells were transfected with vectors  
1265 expressing either no protein (V), Tat, WT-spike (S), Tat and WT-spike (Tat + S) or Tat and HIV-  
1266 gp160 (Tat + gp160). Acceptor cells were transfected with a vector expressing no protein (V), with  
1267 ACE2 or directly with Tat as a positive control (hatched bar). After 48h, cells were co-cultured for  
1268 18h. Luminescence was normalized to the V value arbitrarily set to 1. Data are presented as mean  
1269 values  $\pm$  SD (n=3) and a representative experiment is shown. (C) Donor cells were transfected  
1270 with increasing amount of plasmid expressing WT-spike and acceptor cells were transfected with  
1271 a vector expressing ACE2. After 48h, cells were co-cultured for 18h, and prepared for  
1272 luminescence or microscopy. Correlation between the number of syncytia counted by microscopy  
1273 (n=10 per condition) and the luciferase activity was determined, and the calculated correlation  
1274 coefficient is  $R^2=0.87$ .

1275 SI-Figure 7: **Secretion of S1.** HeLa cells were transiently co-expressed with double-tagged spike  
1276 protein (N-terminal HA-tag; C-terminal V5-tag), WT (S) or its mutants,  $\mu$ S1/S2 or  $\mu$ AS1/S2, and  
1277 ACE2 alone or in combination with TMPRSS2, WT (TMPRSS2) or its S441A active-mutant  
1278 ( $\mu$ TMPRSS2), at a ratio S:ACE2:TMPRSS2 = 1:0.5:0.5. Immunoblot of the 24h conditioned  
1279 media was first probed for secreted S1, S1' and S1<sub>L</sub> (HA-HRP antibody), stripped and next probed  
1280 for shed ACE2 (sACE2).

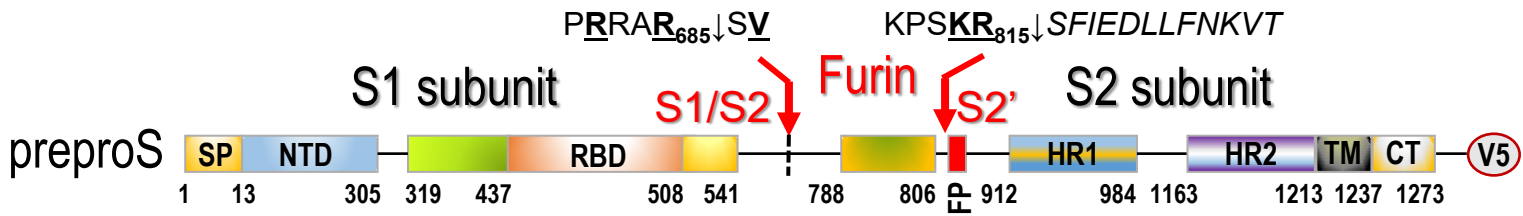

**B**

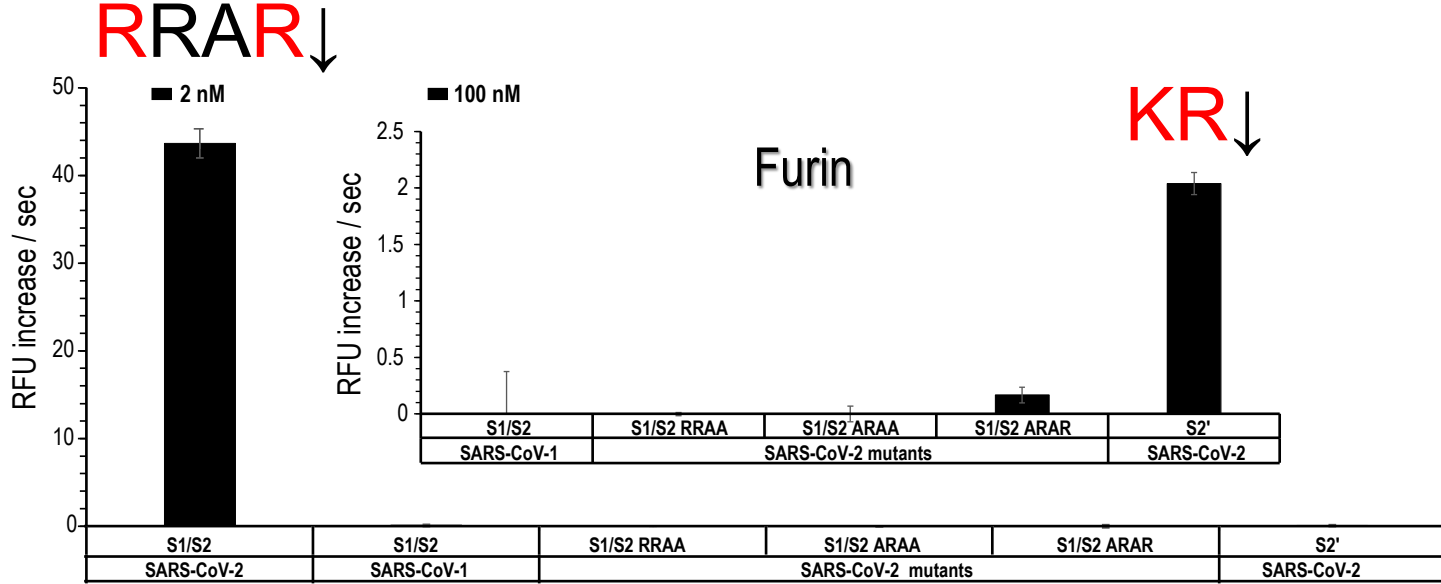

**C**

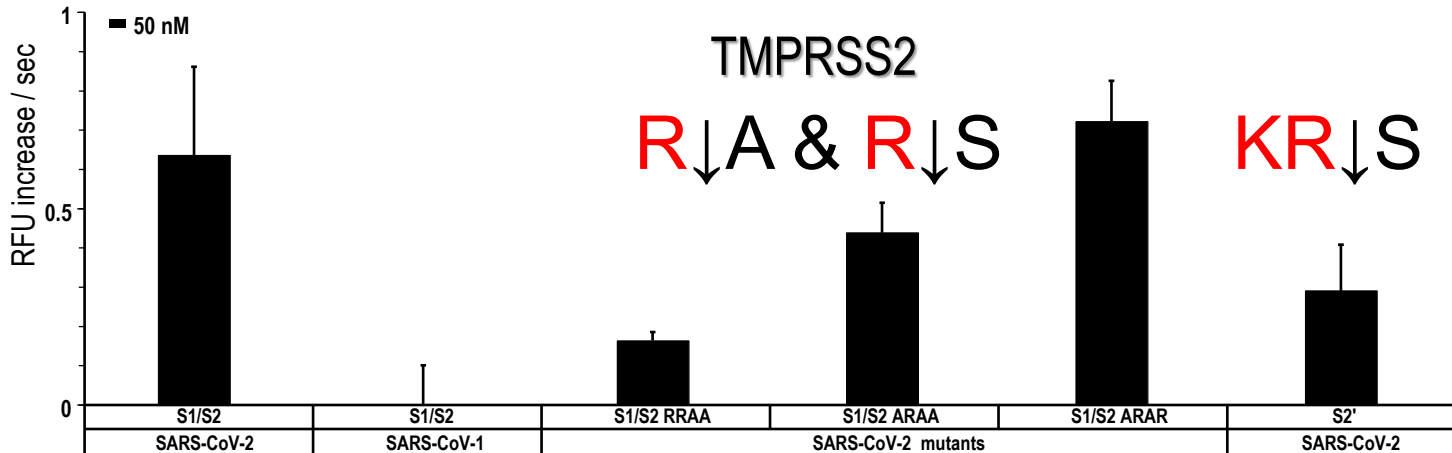

**Figure 1: Processing of S-peptides by Furin and TMPRSS2.** (A) Schematic representation of the primary structure of preproS and its domains and the predicted Furin-like S1/S2 site generating the S1- and S2-subunits, as well as the S2' site preceding the fusion peptide (FP). The signal peptide (SP), N-terminal domain (NTD), receptor binding domain (RBD) to ACE2, the two heptad repeats HR1 and HR2, the transmembrane domain (TM), the cytosolic tail (CT) and the C-terminal V5-tag are indicated. (B) *In vitro* Furin activity against peptides mimicking the S1/S2 (and its mutants) and S2' cleavage site sequence of the spike protein from SARS-CoV-2 and SARS-CoV-1, as described in SI-Table 1. Each substrate was tested at a final protease concentration of 2 and 100 nM. (C) *In vitro* TMPRSS2 activity (at 50 nM) against peptides mimicking the S1/S2 and S2' cleavage site sequence of the spike protein from SARS-CoV-2 (and its mutants) described in SI-Table 1.

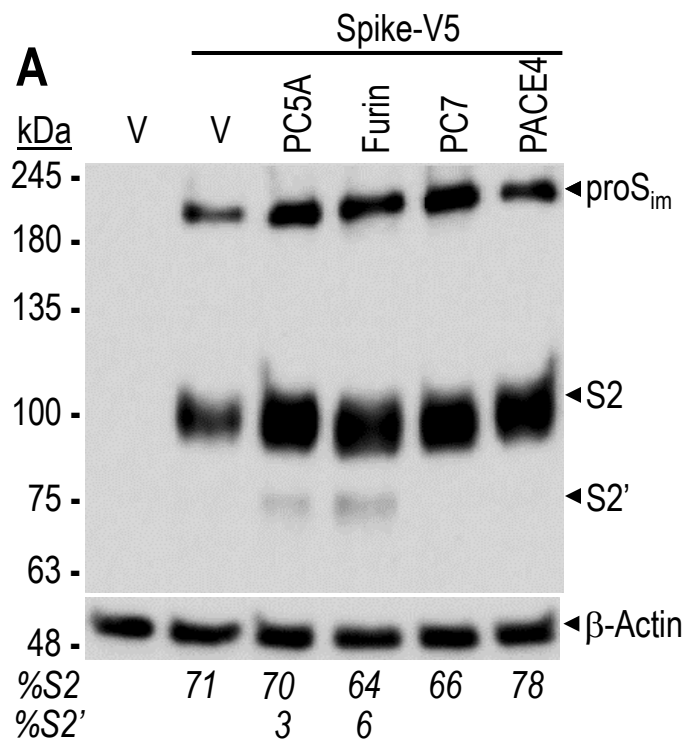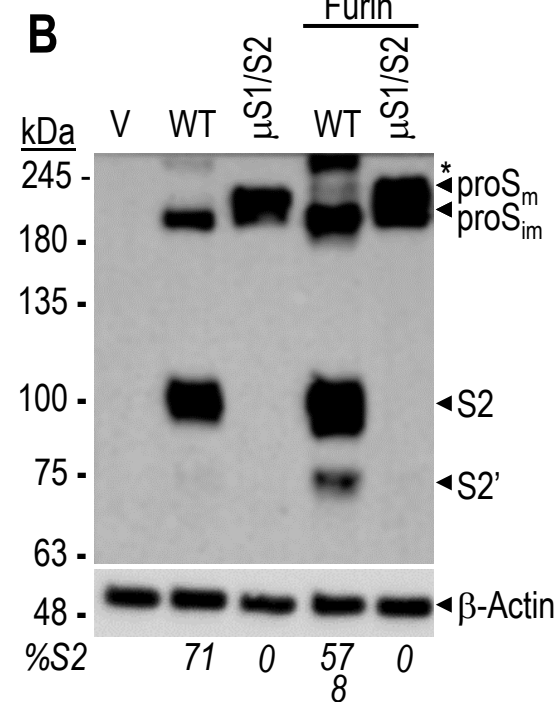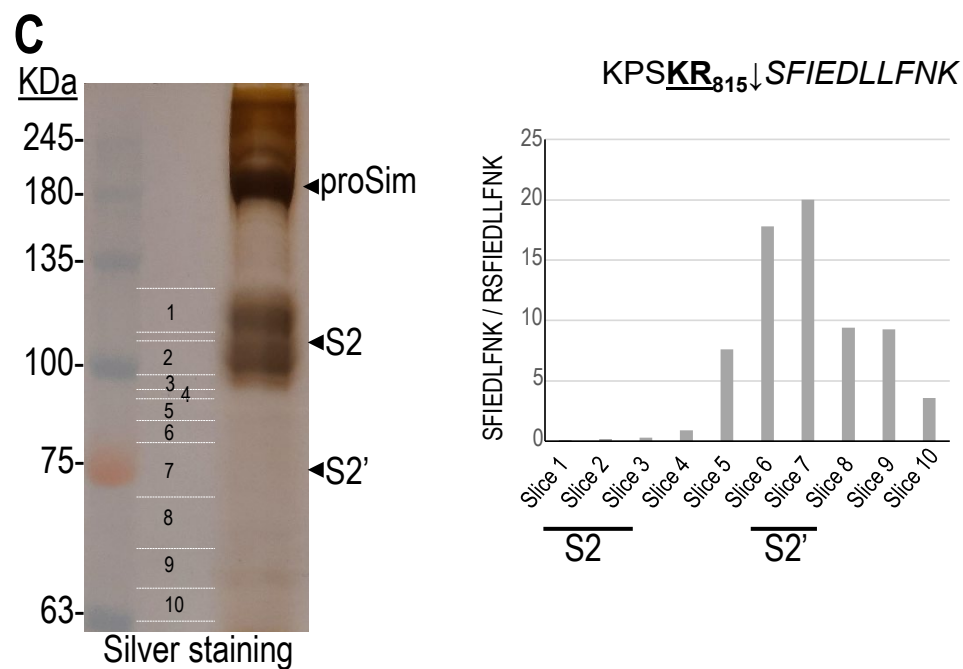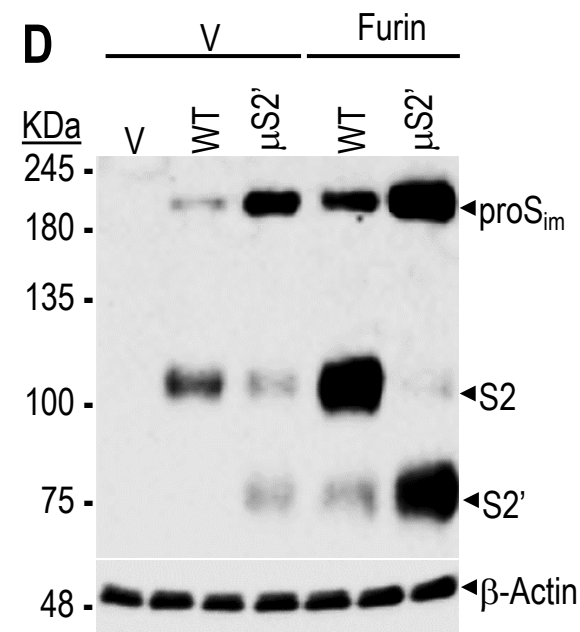

**Figure 2: Processing of spike-glycoprotein in HeLa cells.** (A) Western blot analyses of the processing of WT proS into V5-tagged S2 and S2' by the proprotein convertases Furin, PC5A, PACE4 and PC7 following co-transfection of their cDNAs in HeLa cells. The migration positions of immature proSim, S2 and S2' as well as the  $\beta$ -Actin loading control are emphasized. V = empty pIRES-EGFP-V5 vector. (B) Western blot analyses of HeLa cells following co-transfection with cDNAs coding for either WT-S protein or its double Ala-mutant [R685A + R682A] ( $\mu$ S1/S2) in the absence or presence of Furin cDNA at a ratio S:protease = 1:2. \*Inconsistently observed oligomeric forms of proS. (C) Identification of S2' cleavage site by MS/MS. WT-spike-glycoprotein was immunoprecipitated from HeLa cells using V5 agarose beads then resolved by SDS electrophoresis SDS/PAGE and subjected to silver staining (left panel); the positions of the slices are indicated (1 to 10). The MS/MS analysis of peptides generated by a Lys-specific protease (K814 $\downarrow$ ) are indicated; the data represent the ratio of SFIEDLLFNK<sub>825</sub> to R<sub>815</sub>SFIEDLLFNK<sub>825</sub> (right panel). (D) Western blot analyses of HeLa cells co-transfected with V5-tagged spike protein, WT (S) or its Furin-optimized S2' (KRRKR<sub>815</sub> $\downarrow$ SF) mutant ( $\mu$ S2'), and empty vector (V) or Furin. (A, B) The estimated % cleavages into S1/S2 and S2' are shown and were calculated as the ratio of the V5-immunoreactivity of the cleaved form to the sum of all forms. The data are representative of at least three independent experiments.

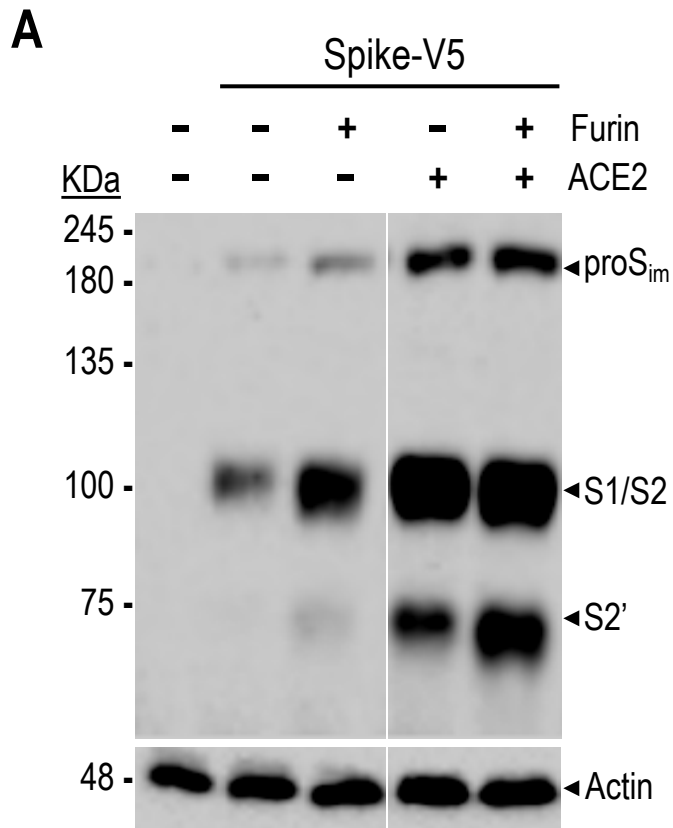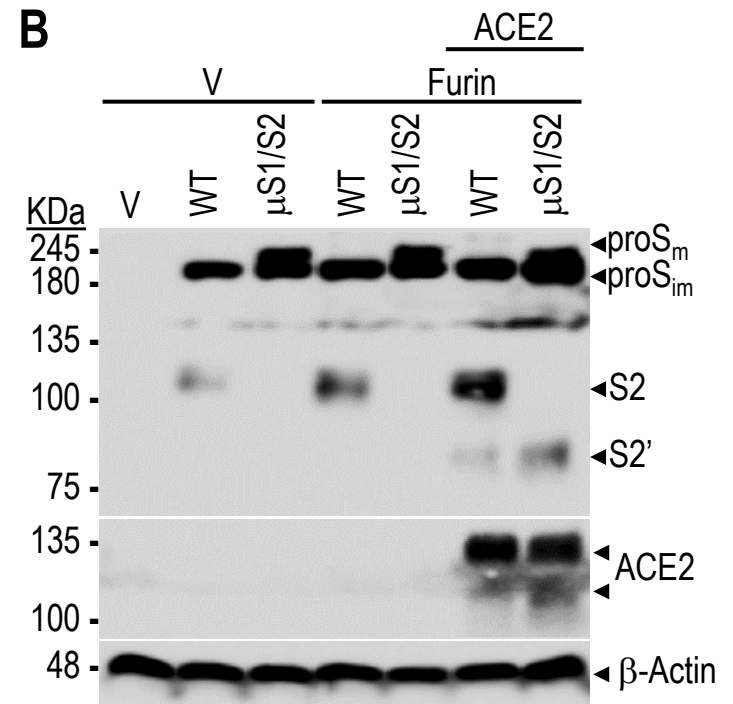

Figure 3: **Processing of spike-glycoprotein at S2' is enhanced in presence of ACE2.** Western blot showing the impact of ACE2 on the processing of WT and  $\mu$ S1/S2 spike-glycoproteins by Furin. HeLa cells expressing empty vector (V), WT proS (A) or its  $\mu$ S1/S2 mutant (B) without or with Furin, ACE2 or both were analysed by Western blotting using anti-V5 antibody. The ratio of cDNAs used was S:ACE2:Furin = 1:1:1. The data are representative of at least three independent experiments.

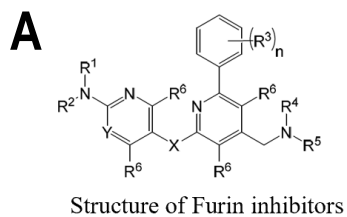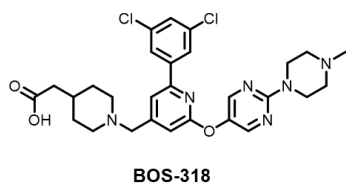**B**

|                   | Furin pIC50      | PC5 pIC50        | PACE4 pIC50      | PC7 pIC50        |
|-------------------|------------------|------------------|------------------|------------------|
| BOS-318           | 8.8±0.4 (n=10)   | 6.7±0.15 (n=8)   | 6.7±0.15 (n=6)   | 7.4±0.22 (n=8)   |
| BOS-981           | 9.3±0.5 (n=10)   | 7.5±0.22 (n=10)  | 6.9±0.1 (n=4)    | 6.9±0.2 (n=8)    |
| BOS-857           | 9.4±0.3 (n=10)   | 7.6±0.2 (n=10)   | 6.7±0.24 (n=5)   | 6.9±0.3 (n=8)    |
| decanoyl-RVKR-cmk | 9.1±0.43 (n=447) | 9.9±0.38 (n=162) | 9.2±0.24 (n=214) | 9.6±0.63 (n=198) |

**C**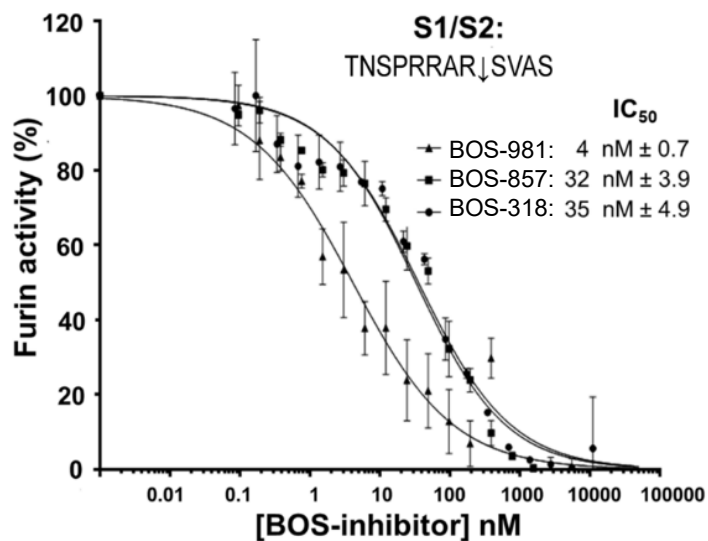**D**

|                   | Golgi pIC50 (U20S) |
|-------------------|--------------------|
| BOS-318           | 7.7±0.24 (n=22)    |
| BOS-981           | 8.3±0.25 (n=12)    |
| BOS-857           | 7.6±0.2 (n=12)     |
| decanoyl-RVKR-cmk | 5.1±0.33 (n=8)     |

**E**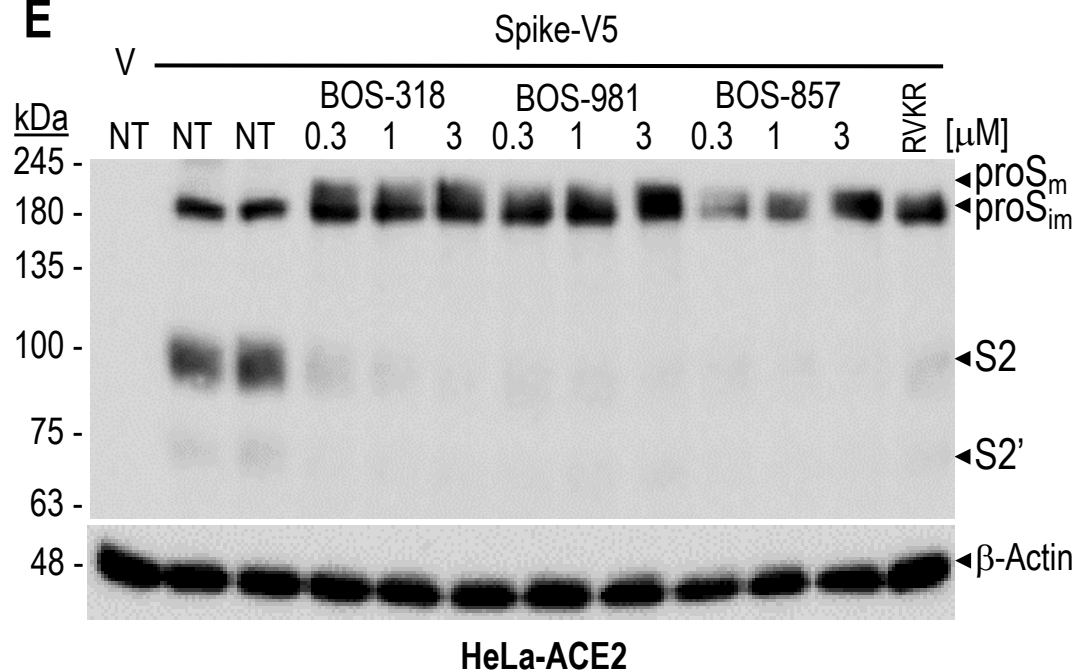



**Figure 4: Inhibition of PCs by BOS compounds.** (A) Chemical motif of BOS-inhibitors and representative structure of BOS-318. (B) *In vitro* BOS-inhibition of the cleavage of the fluorogenic dibasic substrate FAM-QRVRRAVGIDK-TAMRA by each of the proprotein convertases Furin, PC5 (PCSK5), PACE4 (PCSK6) and PC7 (PCSK7). All experiments were performed in 10 different wells and the average pIC<sub>50</sub> (in nM) was calculated. Shown for comparison is the inhibitory pIC<sub>50</sub> of the Furin-like inhibitor dec-RVKR-cmk performed >100 times. (C) *In vitro* inhibition of Furin by the BOS compounds. Furin (2 nM) was incubated with increasing concentration of BOS-inhibitors, and its enzymatic activity against the synthetic peptides DABSYL/Glu-TNSPRRAR↓SVAS-EDANS (5 μM) was measured at pH 7.5 (n=3). (D) Golgi assay: table representing the effects of BOS-inhibitors on U2OS cells expressing each of Furin, PC5A, PACE4 and PC7 simultaneously transduced with a BacMam-delivered construct containing a Golgi-targeting sequence followed by a 12-amino acid Furin/PCSK cleavage site from Bone Morphogenic Protein 10 (BMP10) and GFP at the C terminus (GalNAc-T2-GGGGS-DSTARIRR↓NAKG-GGGGS-GFP). Dibasic cleavage releases NAKG-GGGGS-GFP thereby reducing the Golgi-associated fluorescence estimated by imaging. (E) Furin-inhibitors (BOS) abrogate endogenous processing of the spike-glycoprotein. HeLa cells were transiently transfected with a cDNA encoding an empty vector (V) or with one expressing the V5-tagged spike (S) glycoprotein (spike-V5). At 5h pre-transfection, cells were treated with vehicle DMSO (NT, duplicate) or with the Furin-inhibitors at indicated concentrations, or RVKR-cmk at 50 μM. At 24h post-transfection media were replaced with fresh ones lacking (NT) or containing the inhibitors for an additional 24h. Cell extracts were analyzed by Western blotting using a mAb-V5. All data are representative of at least three independent experiments.

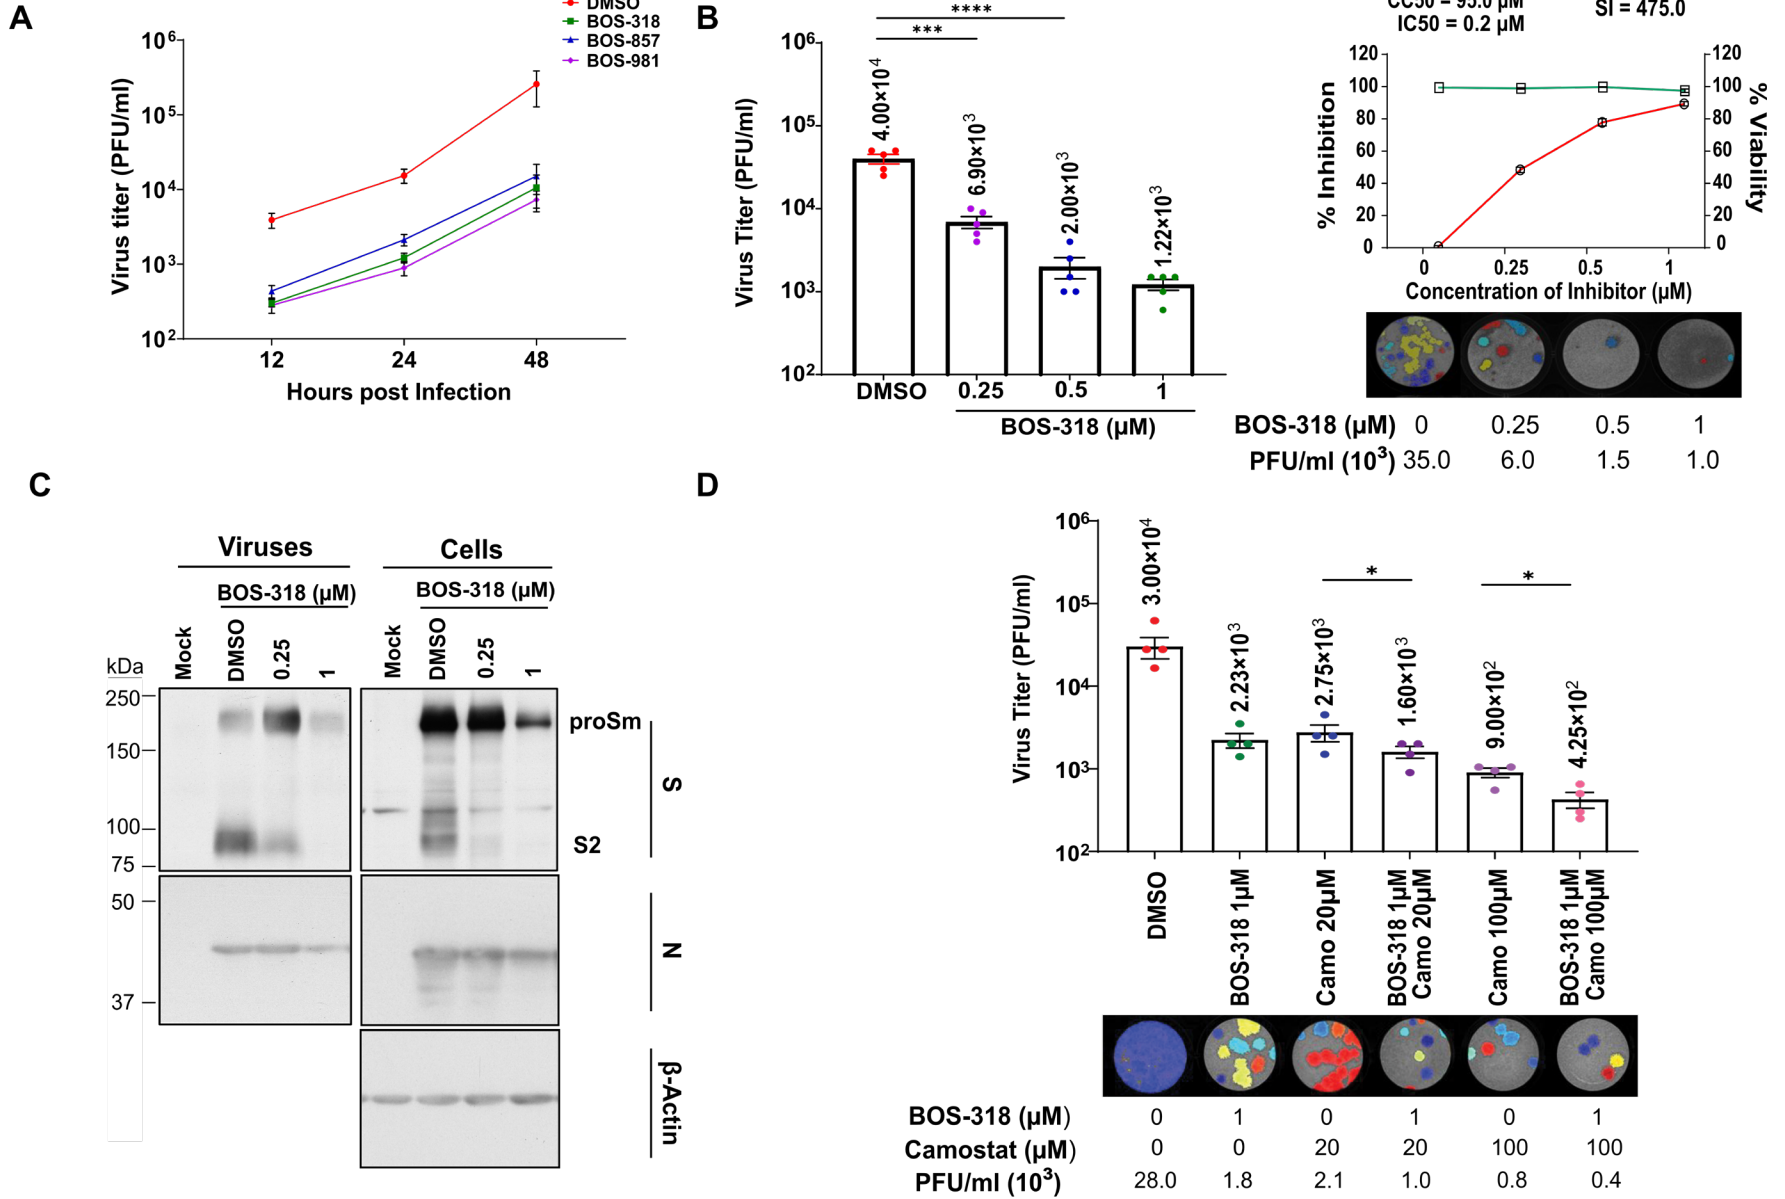

**Figure 5: Furin-like inhibitors and Camostat treatment decrease SARS-CoV-2 infection in Calu-3 Cells.** (A) Replication kinetics was studied at 12, 24 and 48h post-infection by plaque assay to determine PFUs of SARS-CoV-2 virus in the supernatant of infected Calu-3 cells treated or not with 1 $\mu$ M BOS-318, BOS-857 and BOS-981. A line graph represents results of the triplicate plaque assay results (mean  $\pm$  SD). (B) The virus titers (PFU per milliliter) released in the supernatant (24h post-infection) of infected Calu-3 cells treated with indicated concentrations of BOS-318 were determined by plaque assay (mean  $\pm$  SD of triplicates, \* $p$  < 0.05; \*\* $p$  < 0.01; \*\*\* $p$  < 0.001) (left panel). The selectivity index (SI) of BOS-318 in Calu-3 cells as shown in top right panel was determined by  $CC_{50}/IC_{50}$ . The left y axis indicates the inhibition of virus titer (percent) relative to that of the untreated control group (red). The right y axis indicates the cell viability (percent) relative to that of the untreated control group (green). The  $CC_{50}$  (50% cytotoxic concentration),  $IC_{50}$  (half maximal inhibitory concentration), and SI (selectivity index) values for each inhibitor are as shown. Representative plaque images of infected Calu-3 cells treated with indicated doses of BOS-inhibitors are shown in the bottom right panel. (C) Immunoblots for the infected Calu-3 cells (right panel) and viral particles secreted in the supernatant (left panel) with and without treatment with BOS-inhibitors indicate reduced viral protein levels. Immunoblots were probed for the full-length (proSm) and cleaved (S2) fragments of viral S protein and nucleocapsid (N) protein as indicated;  $\beta$ -Actin was included as the loading control for the cells. (D) The virus titers (PFU per milliliter) released in the supernatant (24h post-infection) of infected Calu-3 cells treated with BOS-318 and/or Camostat (Camo) were determined by plaque assay (mean  $\pm$  SD of duplicates, \*,  $p$  < 0.05; \*\*,  $p$  < 0.01; \*\*\*,  $p$  < 0.001) (top panel). Representative plaque images of infected Calu-3 cells are shown in the bottom panel. Color plaques differentiate the lawn (one color gray per well) from individual plaques (independent colors).



**Figure 6: Processing of SARS-CoV-2 S by Furin-like convertases and TMPRSS2 is critical for viral entry in human lung epithelial cells but not in model HEK293 cells stably expressing ACE2.** (A) Furin cleavage of proS at the S1/S2 site is required for SARS-CoV-2 pseudoviral entry in Calu-3 cells but not HEK293T-ACE2 cells. Cells were inoculated with nanoluciferase-expressing HIV particles pseudotyped with SARS-CoV-2: wild-type spike (WT), double Ala-mutant spike ( $\mu$ S1/S2) or Furin-optimized spike ( $\mu$ S2'). Inhibition of proS processing at S1/S2 by a novel Furin-like inhibitor (BOS-318) during pseudovirion packaging prevents viral entry in Calu-3 cells but not in HEK293T-ACE2 cells. (B) Western blot analyses show inhibition by BOS-318 of proS processing at S1/S2 site. Purified pseudovirions and cellular extracts of producing HEK293-T17 cells treated or not with BOS-318 inhibitor were separated on SDS-PAGE gel and analyzed for HIV-1 p24 and V5-tagged S-protein (proSm or cleaved, S2) as indicated. (C) Pre-treatment of Calu-3 cells with 1  $\mu$ M BOS-318 (B), 100  $\mu$ M Camostat (C) or both (B+C) markedly reduces viral entry. In Panels A and C, Calu-3 cells were transduced with nanoluciferase-expressing HIV particles pseudotyped with SARS-CoV-2 S WT,  $\mu$ S1/S2 or  $\mu$ S2' for 72h and analyzed for nano-luciferase expression. Viral entry was expressed as fold increase over that given by bald particles (pseudovirions made in the absence of S). Each dot represents a different experiment with median luciferase activity calculated from three biological replicates. Two to four experiments were performed for each cell type. Error bars indicate standard deviation (SD) from the mean.

**A**

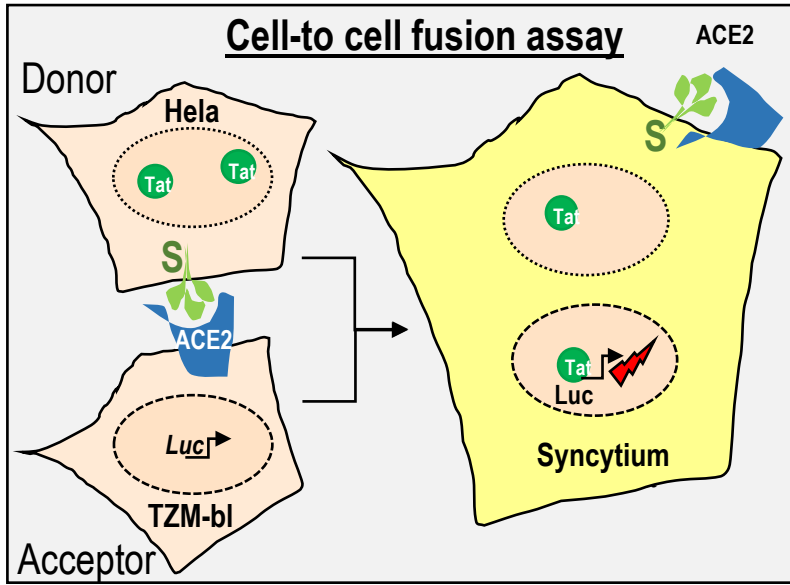

**B**

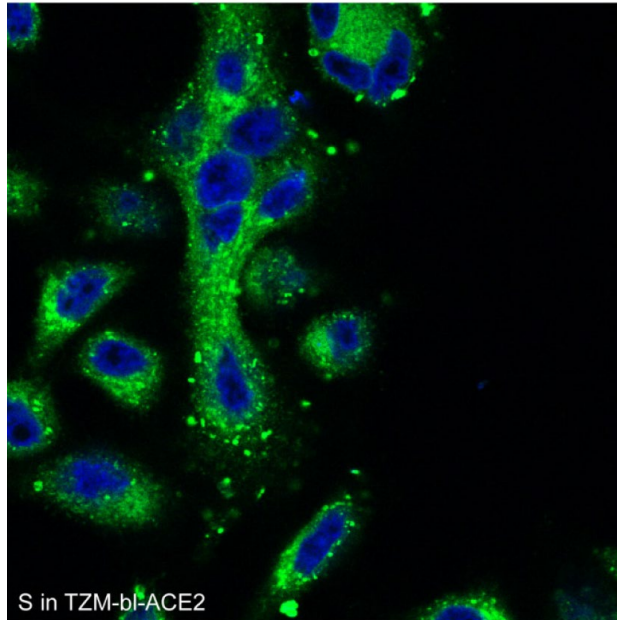

**C**

**ACE2 in acceptor cell**

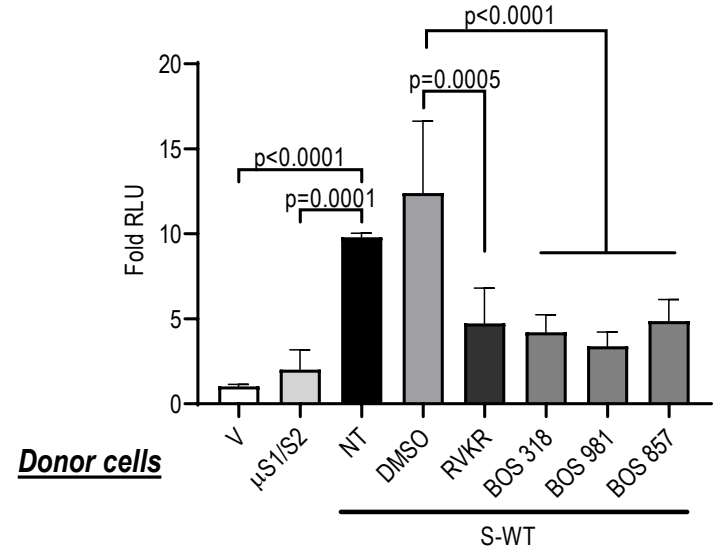

**D**

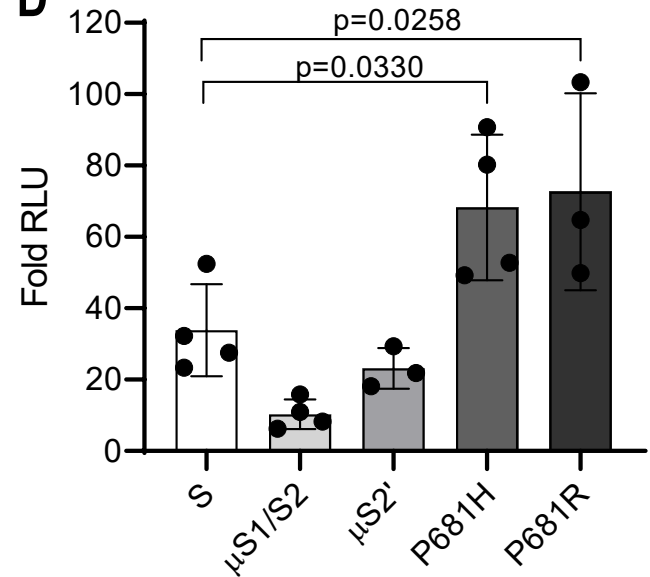

**Figure 7: Spike-induced cell-to-cell fusion relies on Furin cleavage at S1/S2.** (A) Cell-to-cell fusion between donor cells (HeLa) expressing the fusogenic SARS-CoV-2 spike protein along with the HIV trans-activator Tat, and acceptor cells (TZM-bl) that express ACE2. Upon fusion, Tat is transferred from donor to acceptor cells, thereby inducing luciferase expression. (B) Cell-to-cell fusion was evaluated using confocal microscopy. A representative immunocytochemistry of HeLa cells transfected with a vector expressing SARS-CoV-2 spike co-cultured with TZM-bl cells for 18h. The number of syncytia (multiple nuclei) was examined using CellMask™ to probe for the plasma membrane and Dapi to stain the nuclei. (C) Donor cells were transfected with vectors expressing either no protein (empty vector, V),  $\mu$ S1/S2, or WT-spike (S) in the absence (NT) or presence of vehicle (DMSO) or with the Furin-inhibitors BOS-318, BOS-981, BOS-857 (300 nM) or RVKR (10  $\mu$ M). Acceptor cells were transfected with a vector expressing ACE2. After 48h, donor and acceptor cells were co-cultured for 18h. Relative luminescence units (RLU) were normalized to the V value arbitrarily set to 1. Data are presented as mean values  $\pm$  SD (n=3), One-Way ANOVA, Dunn-Sidak multiple comparison test. (D) Donor HeLa cells expressing WT-S or its indicated mutants and variants were co-cultured with acceptor TZM-bl cells expressing ACE2. The extent of fusion is represented as a ratio between the RLU measured for each condition and that of donor cells expressing empty vector. The bar graph represents the average of 4 experiments performed in triplicates. Data are presented as mean values  $\pm$  SEM (n=3 or 4), One-way Anova Dunnett's multiple comparison test.

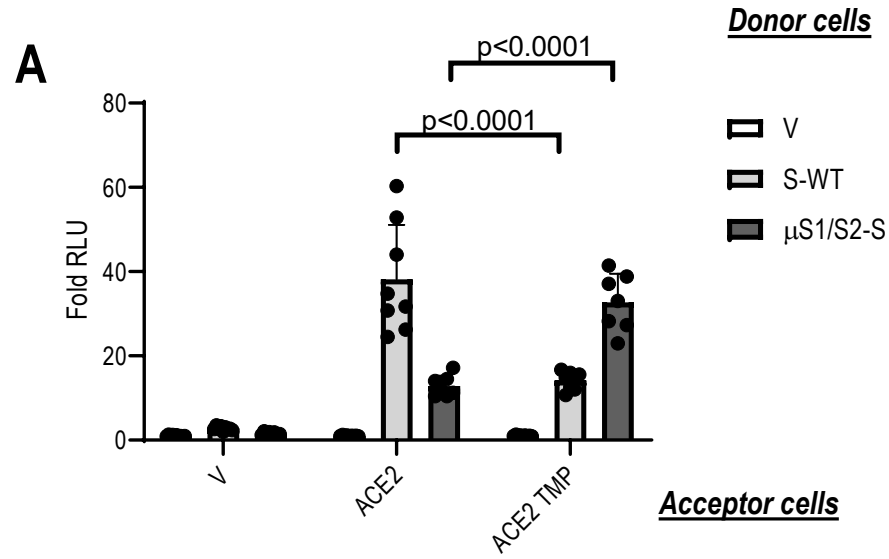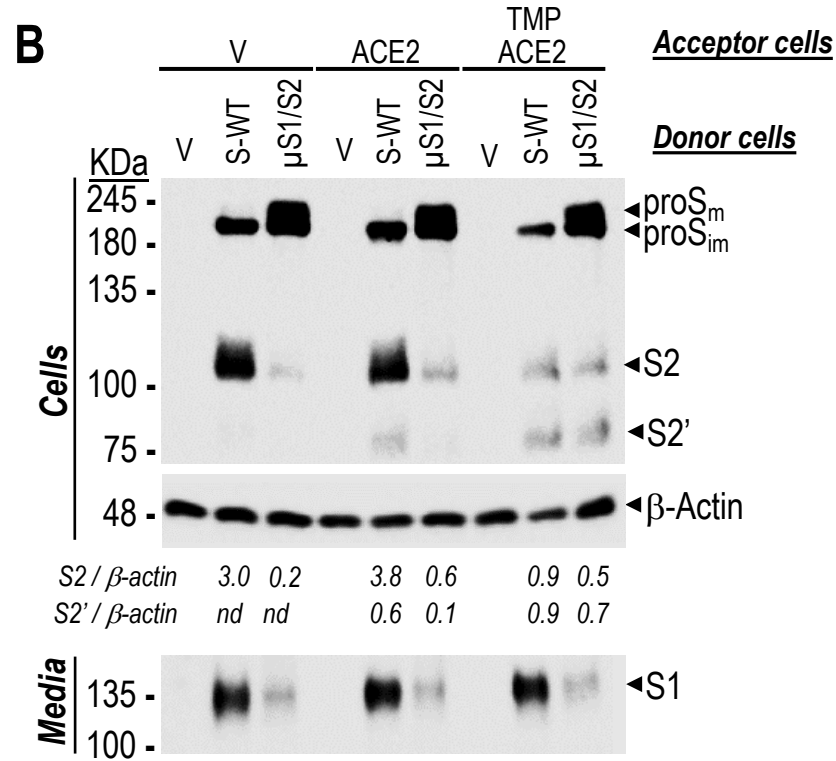



**Figure 8: Spike-glycoprotein processing by Furin and TMPRSS2 in a co-culture system and their role in cell-to-cell fusion.**

Donor HeLa cells expressing empty vector (V), WT-S-HA or  $\mu$ S1/S2-HA were co-cultured with acceptor TZM-bl cells expressing V, ACE2 + V, or ACE2 + TMPRSS2. From the same experiment, cell-to-cell fusion (**A**) was assessed in parallel with spike processing in cells and media by Western blotting (**B**). (**B**) spike-glycoproteins in the cell extracts were analyzed by Western blotting using an anti-V5 mAb. Secreted forms of spike protein (S1) in the media were detected with anti HA-HRP upon immunoprecipitation with anti-HA agarose. The bar graph represents the average of 3 experiments performed in triplicates. Data are presented as mean values  $\pm$  SD Two-way Anova Turkey's multiple comparison test. The corresponding Western-blot is representative of three independent experiments. Values of S2 and S2' relative to  $\beta$ -actin are shown (nd = too low or not detected).

**A**

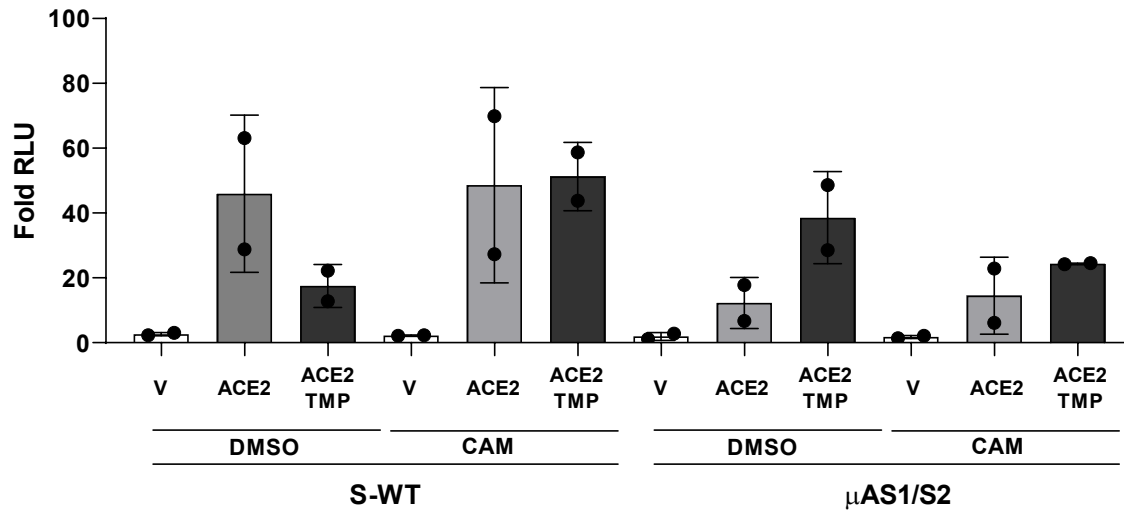

**B**

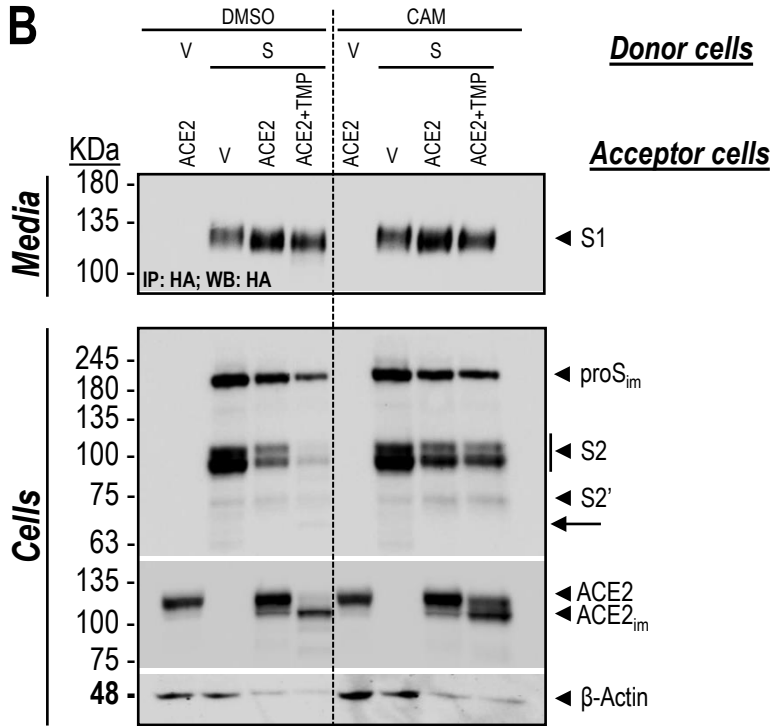

**C**

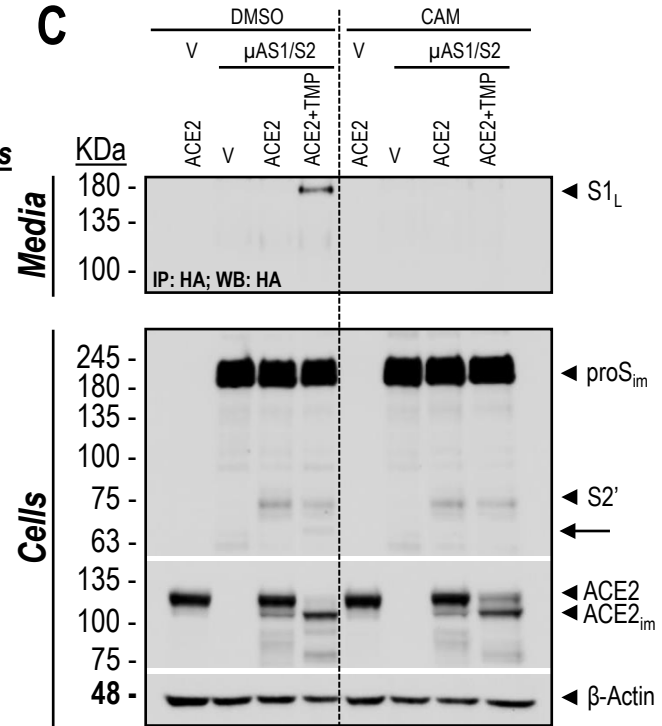

**Figure 9: Exogenous TMPRSS2-generated shedding of ACE2 differentially regulates S-induced fusion at the plasma membrane of WT-S versus  $\mu$ AS1/S2.** Donor HeLa cells expressing double tagged (N-terminal HA-tag; C-terminal V5-tag) spike-glycoprotein WT (S) or its S1/S2 mutant ( $\mu$ AS1/S2) were co-cultured with acceptor TZM-bl cells expressing (empty vector, V), ACE2 + V, or ACE2 + TMPRSS2 and treated with DMSO (vehicle control) or Camostat (120 $\mu$ M). Within the same experiment, cell-to-cell fusion (A) was assessed in parallel with spike processing in cells and media by Western-blot (B, C). (A) The extent of fusion is represented as a ratio between the RLU measured for each condition and that of donor cells expressing V. The bar graph represents the average of 2 experiments performed in triplicates. (B, C). Western blot analyses of media and cell extracts of the co-cultured cells with donor cells overexpressing double tagged (N-terminal HA-tag; C-terminal V5-tag) spike-glycoprotein, WT (S) (B) or  $\mu$ AS1/S2 (C). The arrow points to a putative degradation product of S2', that is absent in presence of Camostat. Media were subjected to immunoprecipitation with anti-HA agarose for the secreted forms of spike protein (S1, S1<sub>L</sub>) followed by Western blotting with anti HA-HRP. spike-glycoproteins in the cell extracts were immunoblotted with anti-V5 mAb. The data are representative of three independent experiments.

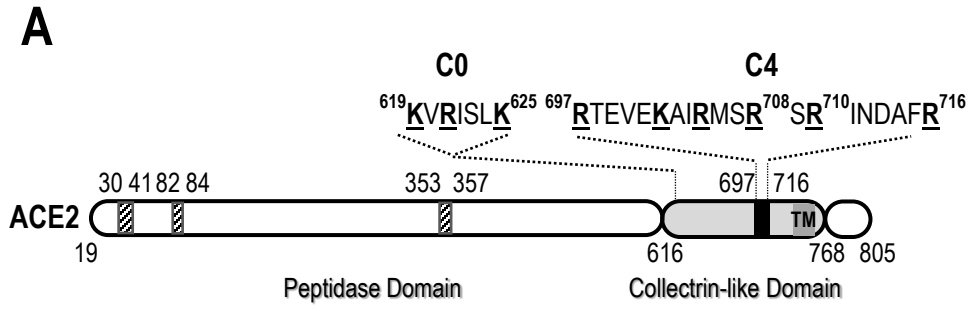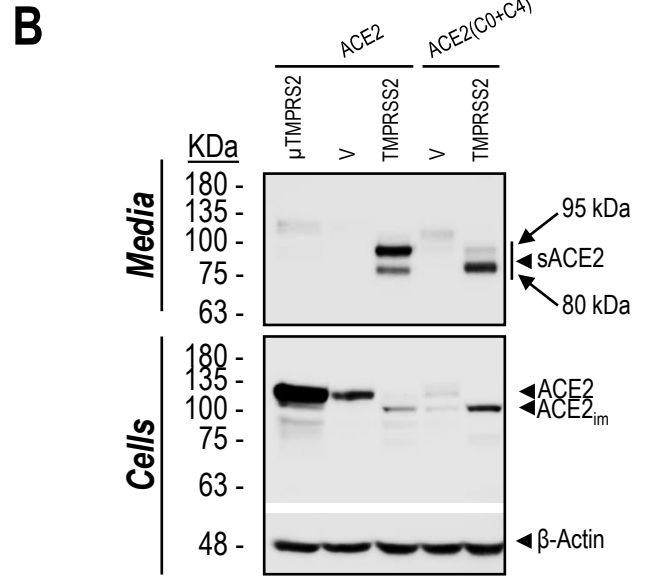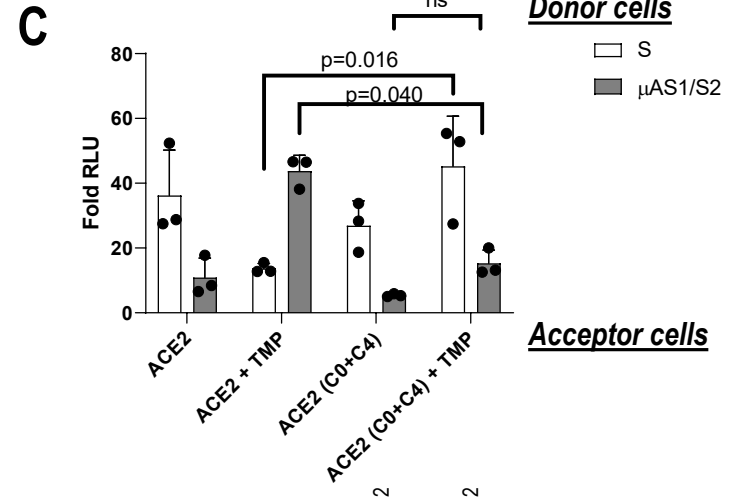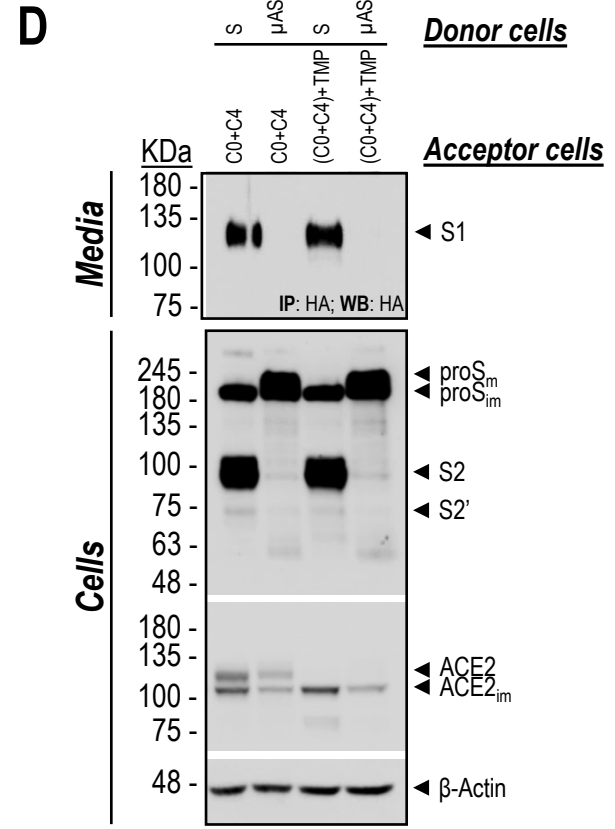

**Figure 10: The C-terminal collectrin-like domain of ACE2 may be critical for the regulation of cell-to-cell fusion of spike-glycoprotein when exogenous TMPRSS2 is present.** (A) Schematic representation of the primary structure of human ACE2 with emphasis on the C-terminal collectrin-like domain (aa 616-768, light grey), TMPRSS2 cleavage region (aa 697-716, black) and the polybasic amino-acid segments in which K/R were mutated to A (C0 and C4) (amino acids underlined and in bold). Also shown are the peptidase domain (aa 19-615, white) containing the regions involved in the interaction with the spike SARS-CoV protein (hatched) and transmembrane domain (TM). (B) HeLa cells were co-transfected with ACE2, WT (ACE2) or its mutant ACE2 (C0+C4), and TMPRSS2, WT (TMPRSS2) or its S441A active-site mutant ( $\mu$ TMPRSS2), or empty vector (V). Media and cell extracts were analyzed by western blotting for shed ACE2 (sACE2) and ACE2, respectively. The migration positions of the ~95 kDa and ~80 kDa sACE2 are emphasized. (C) Donor HeLa cells expressing WT-S-HA or  $\mu$ AS1/S2-HA were co-cultured with acceptor TZM-bl cells expressing ACE2, WT (ACE2) or its mutant ACE2 (C0+C4) in presence or absence of TMPRSS2. From the same experiment, cell-to-cell fusion was assessed (C), in parallel with WB analyses of cells and media (D). The extent of fusion is represented as a ratio between the RLU measured for each condition and that of donor cells expressing an empty vector. The bar graph represents the average of 3 experiments performed in triplicates. Data are presented as mean values  $\pm$  SD (n=3), One-way Anova Turkey's multiple comparison test. (D) Co-culture media were subjected to immunoprecipitation with anti-HA agarose for the secreted forms of spike protein (S1) followed by western blot with anti HA-HRP. spike-glycoproteins in the cell extracts were immunoblotted with anti-V5 mAb. The Western blot data are representative of three independent experiments.

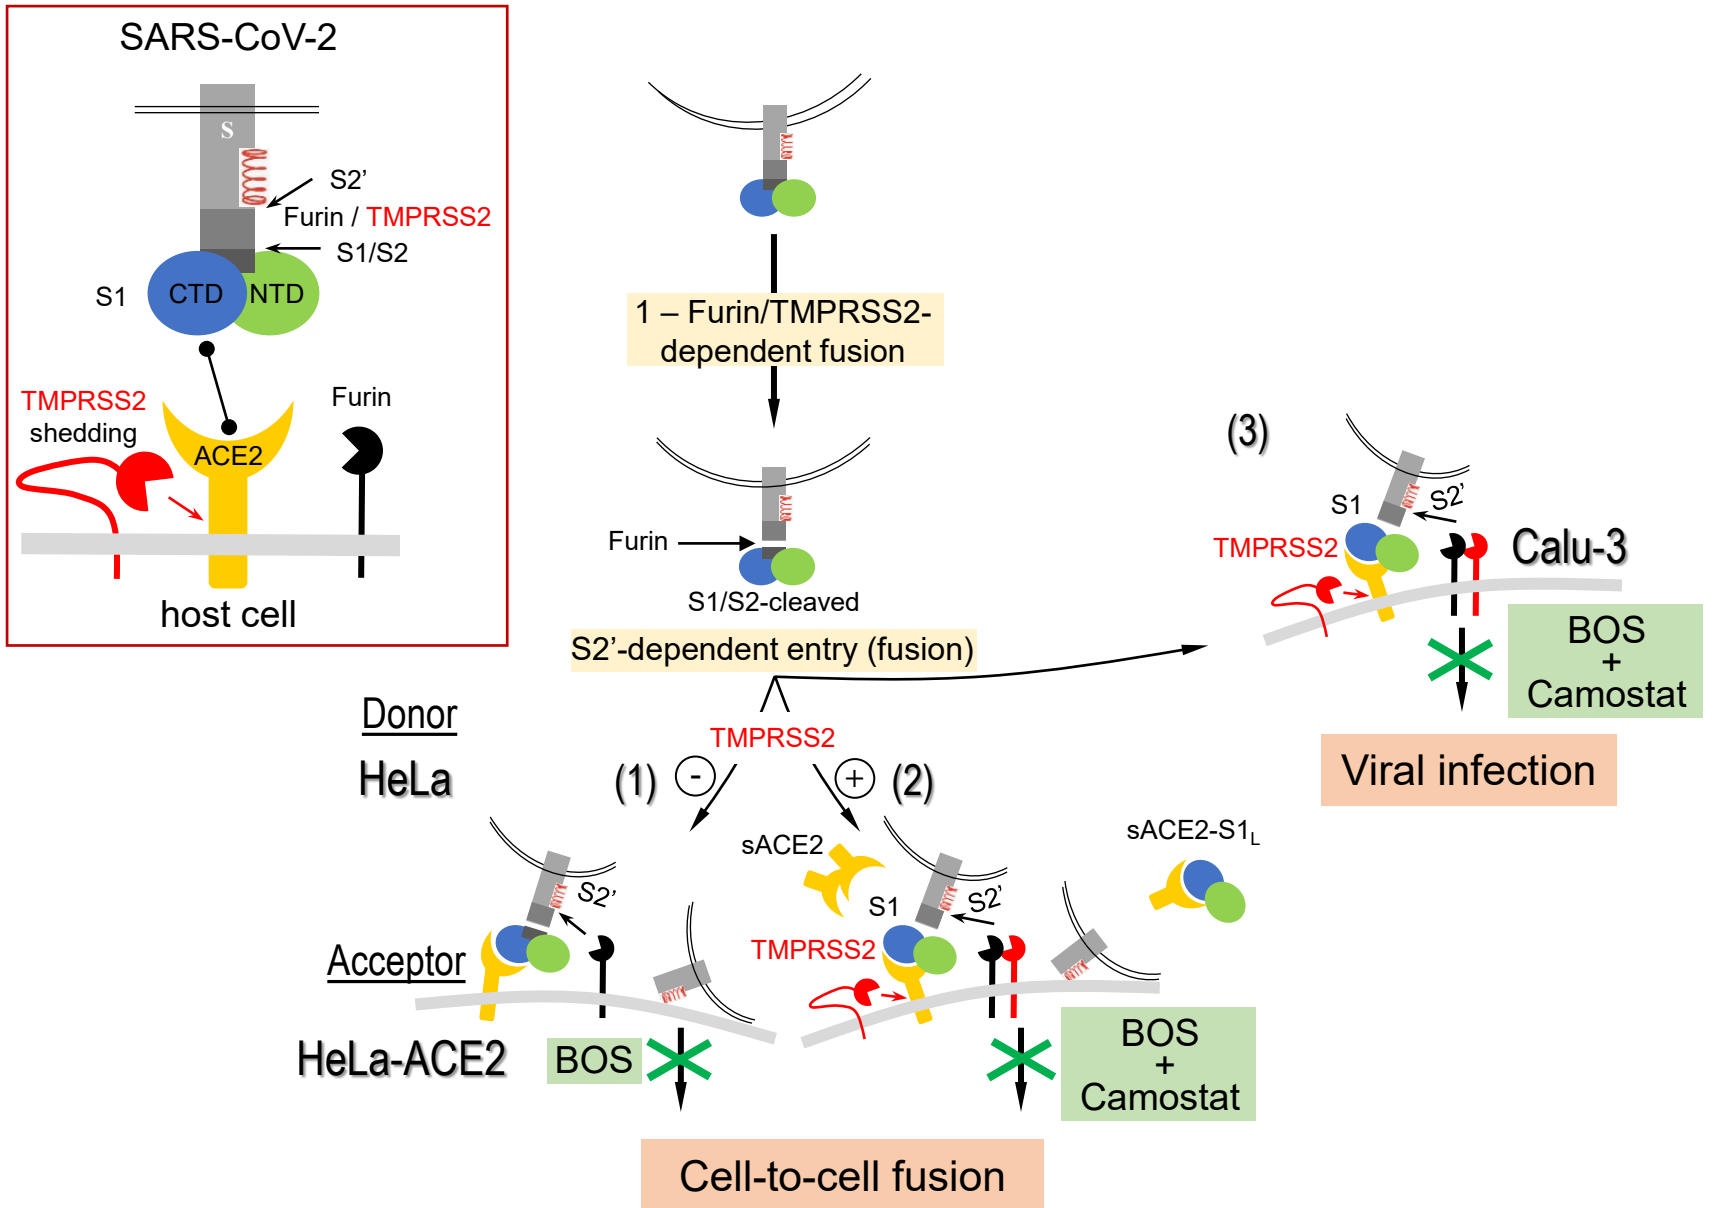

**Figure 11: Proposed model for the processing of S-protein and its blockade by Furin and TMPRSS2 inhibitors.**

Boxed left panel: Schematic representation of the S-glycoprotein domains of SARS-CoV-2, including the N-terminal (NTD) and C-terminal (CTD) domains of S1, the Furin-S1/S2 and the Furin/TMPRSS2-S2' processing sites as well as the fusogenic  $\alpha$ -helix that follows S2'. Binding of the RBD domain of S1 to the membrane associated ACE2 in target cells, and the cell surface expression of TMPRSS2 and Furin are also schematized. Right panels: **(1)** BOS-inhibitors (or  $\mu$ S1/S2 mutant) completely prevent cell-to-cell fusion of donor HeLa cells expressing S-glycoprotein with acceptor HeLa-ACE2 cells, which lack endogenous TMPRSS2. In this context, this reveals that Furin is a major processing enzyme cleaving at S1/S2 and generating S2'. **(2)** In acceptor HeLa cells expressing TMPRSS2 (+), maximal prevention of cell-to-cell fusion can be achieved by a combination of Furin (BOS, phenocopying the  $\mu$ S1/S2 or  $\mu$ AS1/S2 mutants) and TMPRSS2 (Camostat) inhibitors blocks S2' production, ACE2-shedding (sACE2) and the separation of sACE2-S1L complex from S2. **(3)** Optimal blockade of SARS-CoV-2 infection of Calu-3 cells, which express endogenously both Furin and TMPRSS2, is also achieved by a combination of Furin (BOS) and TMPRSS2 (Camostat) inhibitors.
